# Supplementary material for: The mitochondrial genome map of Nelumbo nucifera reveals ancient evolutionary features
Source: PubMed Central journal article supplement (PMC4957087; doi:10.1038/srep30158), 2016-07-22
Supplement: srep30158-s1.pdf [file srep30158-s1.pdf]

# **The mitochondrial genome map of *Nelumbo nucifera* reveals ancient evolutionary features**

Songtao Gui<sup>1#</sup>, Zihua Wu<sup>1#</sup>, Hongyuan Zhang<sup>1</sup>, Yinzen Zheng<sup>1</sup>, Zhixuan Zhu<sup>1</sup>, Dequan Liang<sup>2</sup> and Yi Ding<sup>1\*</sup>

1 State Key Laboratory of Hybrid Rice, Department of Genetics, College of Life Sciences, Wuhan University, Wuhan 430072, China

2 Nextomics Biosciences Co., Ltd., Wuhan, 430075, China

#The authors contributed equally to this study

\*Correspondence and requests for materials should be addressed to Y D.(email: yiding@whu.edu.cn)

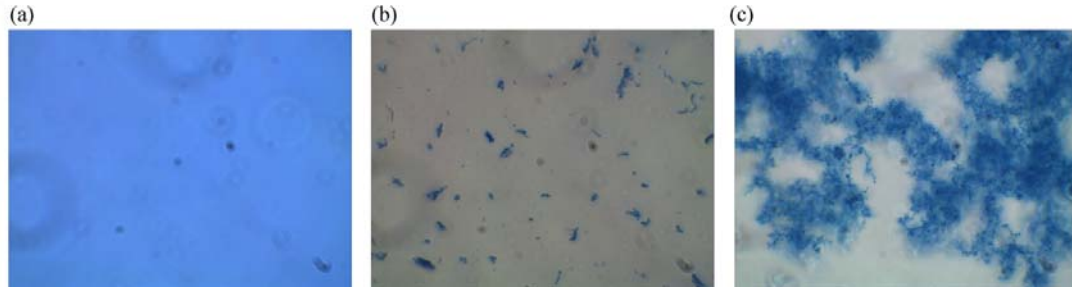

**Figure S1.** The microscopic observation of dyed mitochondria using *Janus Green B* staining. (a) Native control of water, (b) positive control of oral epithelial cells and (c) isolated *N. nucifera* mitochondria with activity.

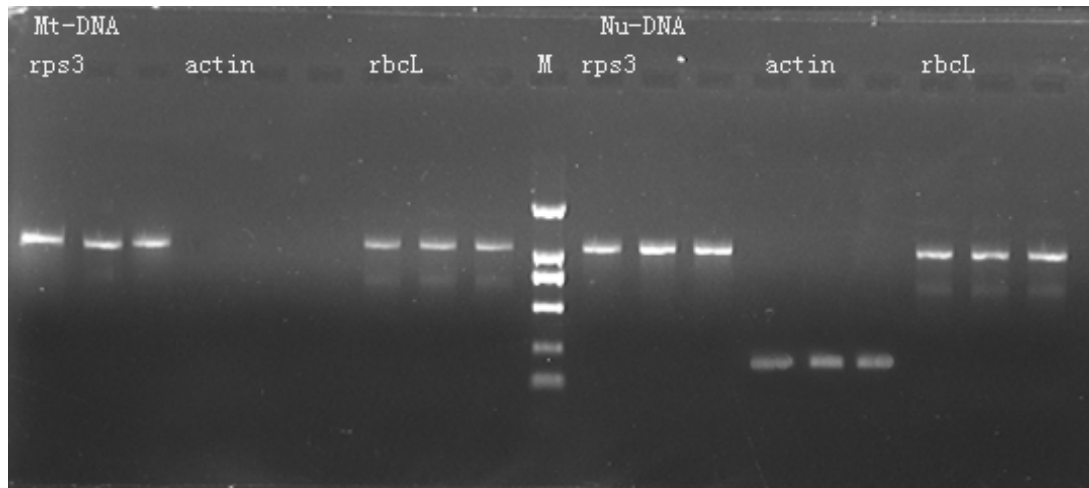

**Figure S2.** The detection of mtDNA purity using three specific primers from nuclear ( $\beta$ -actin), mitochondrial (*rps3*) and chloroplast (*rbcL*) genes. “mt-DNA” represents the mtDNA isolated from the 1.6 M/1.2 M sucrose interface, and “Nu-DNA” represents the total DNA. “M” indicates the DL2000 marker.

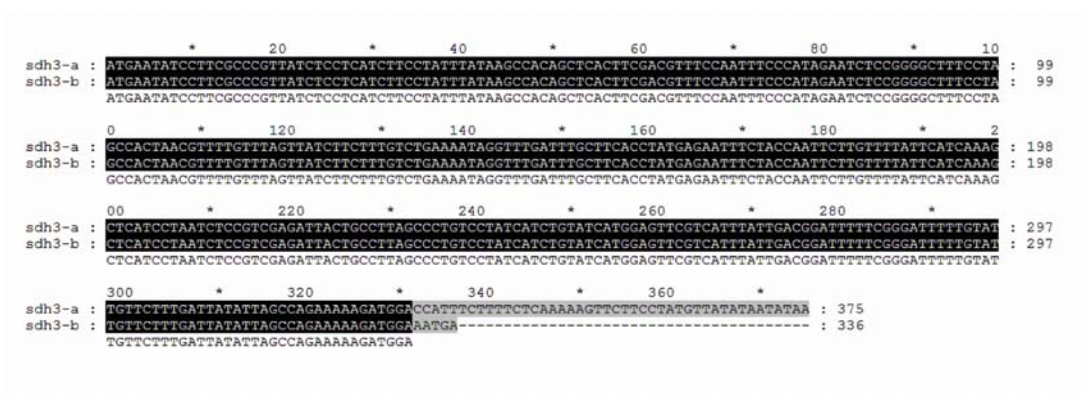

**Figure S3.** The alignment of the *sdh3-a* and *sdh3-b* genes in the *N. nucifera* mitochondrial genome.

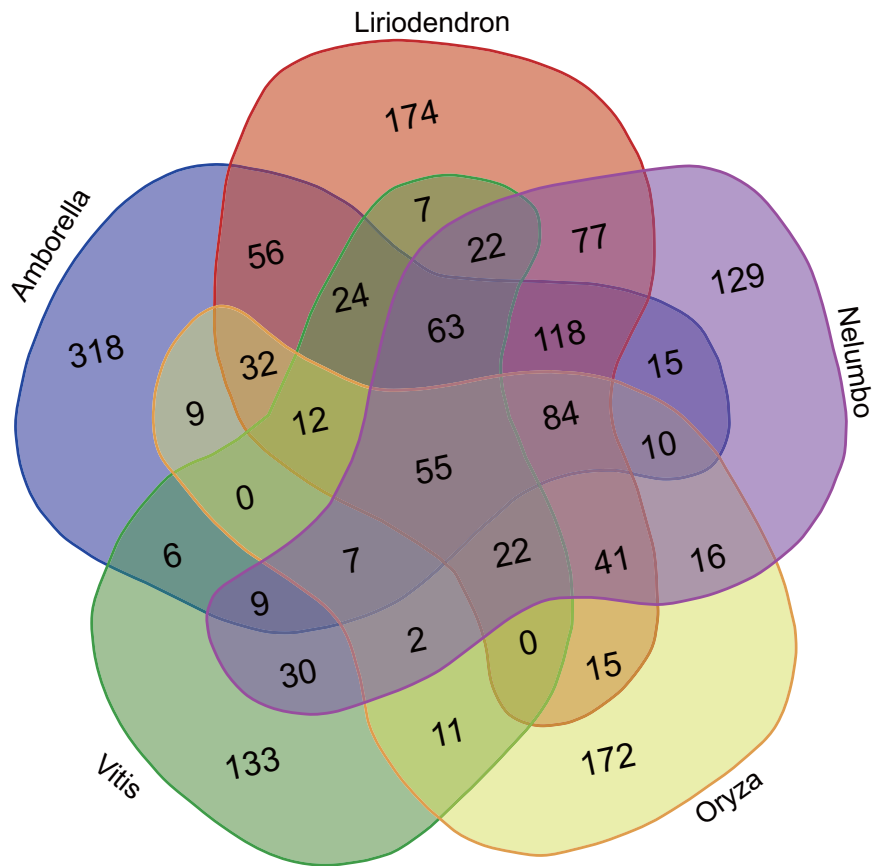

**Figure S4.** Venn diagram of the shared RNA editing sites among *Amborella trichopoda*, *Liriodendron tulipifera*, *Nelumbo nucifera*, *Vitis vinifera* and *Oryza sativa*.

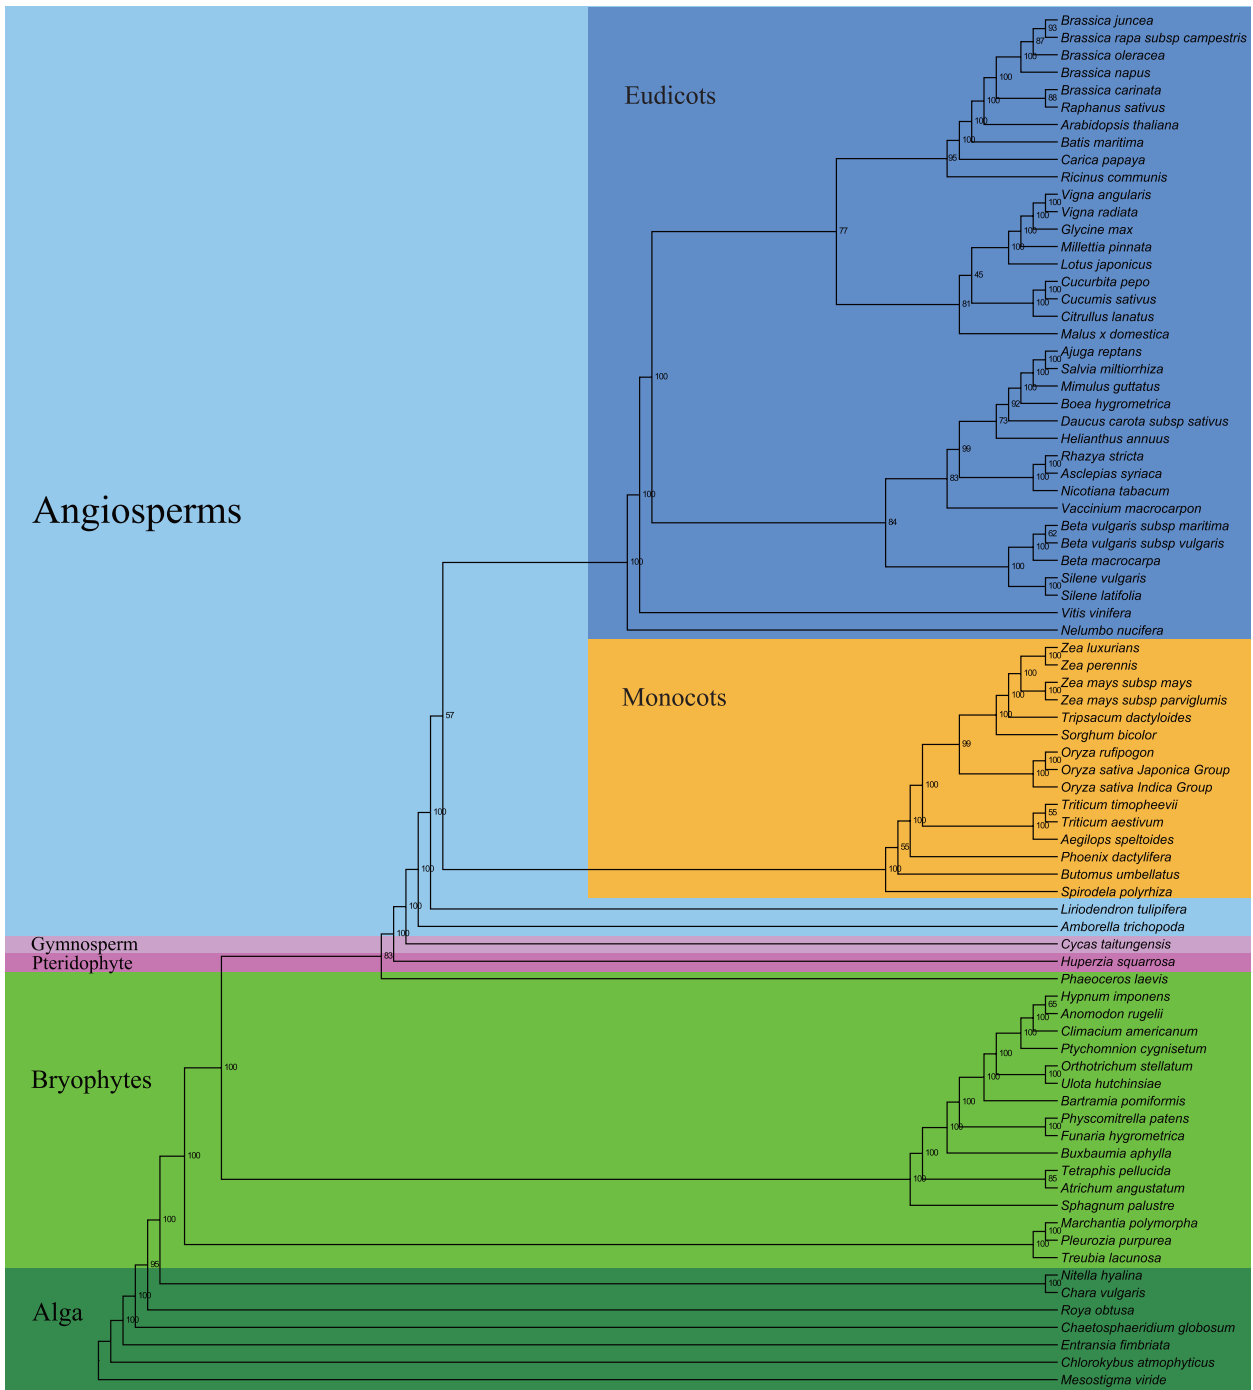

8.0

**Figure S5.** Phylogenetic tree constructed using the data from 79 taxa based on 41 mitochondrial protein-coding genes. Different phyla and classes are highlighted in different colors, with the name of each phylum or class marked at the left of each highlight. The number at each node indicates the percentage of bootstrap value.

**Figure S6. The maximum likelihood trees of 41 single genes.** Bootstrap values >50 or aLRT values >0.75 are shown on the branches. Black dots on the node indicate bootstrap value >60 and aLRT values >0.8; red dots on the node indicate bootstrap value >85 and aLRT values >0.95. Different phyla and classes are highlighted in different colors (Alga, dark green; Bryophytes, light green; Pteridophyte, purple; Gymnosperm, pink; Angiosperms, light blue; Monocots, orange; Eudicots, dark blue). The branch scales (substitutions per site) are shown on the top left of each tree, bold branches correspond to four times the scales.

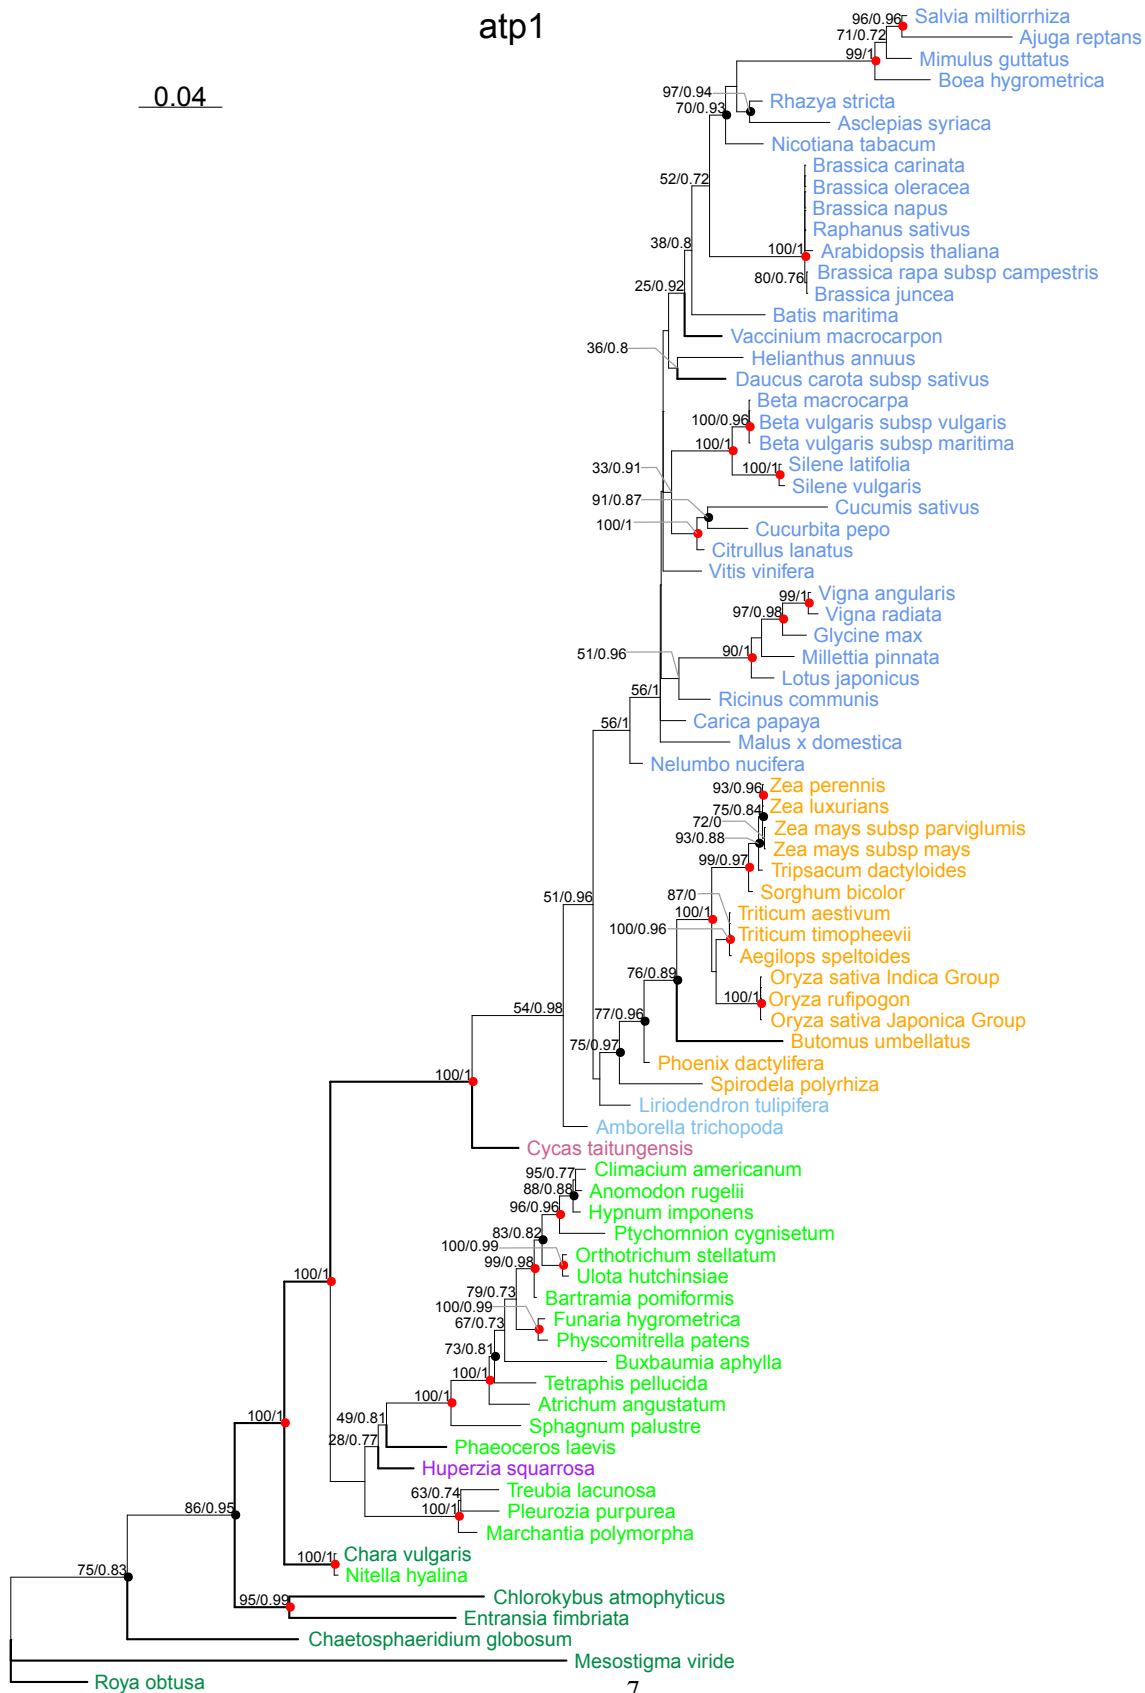

Figure S6 (continued)

atp4

0.04

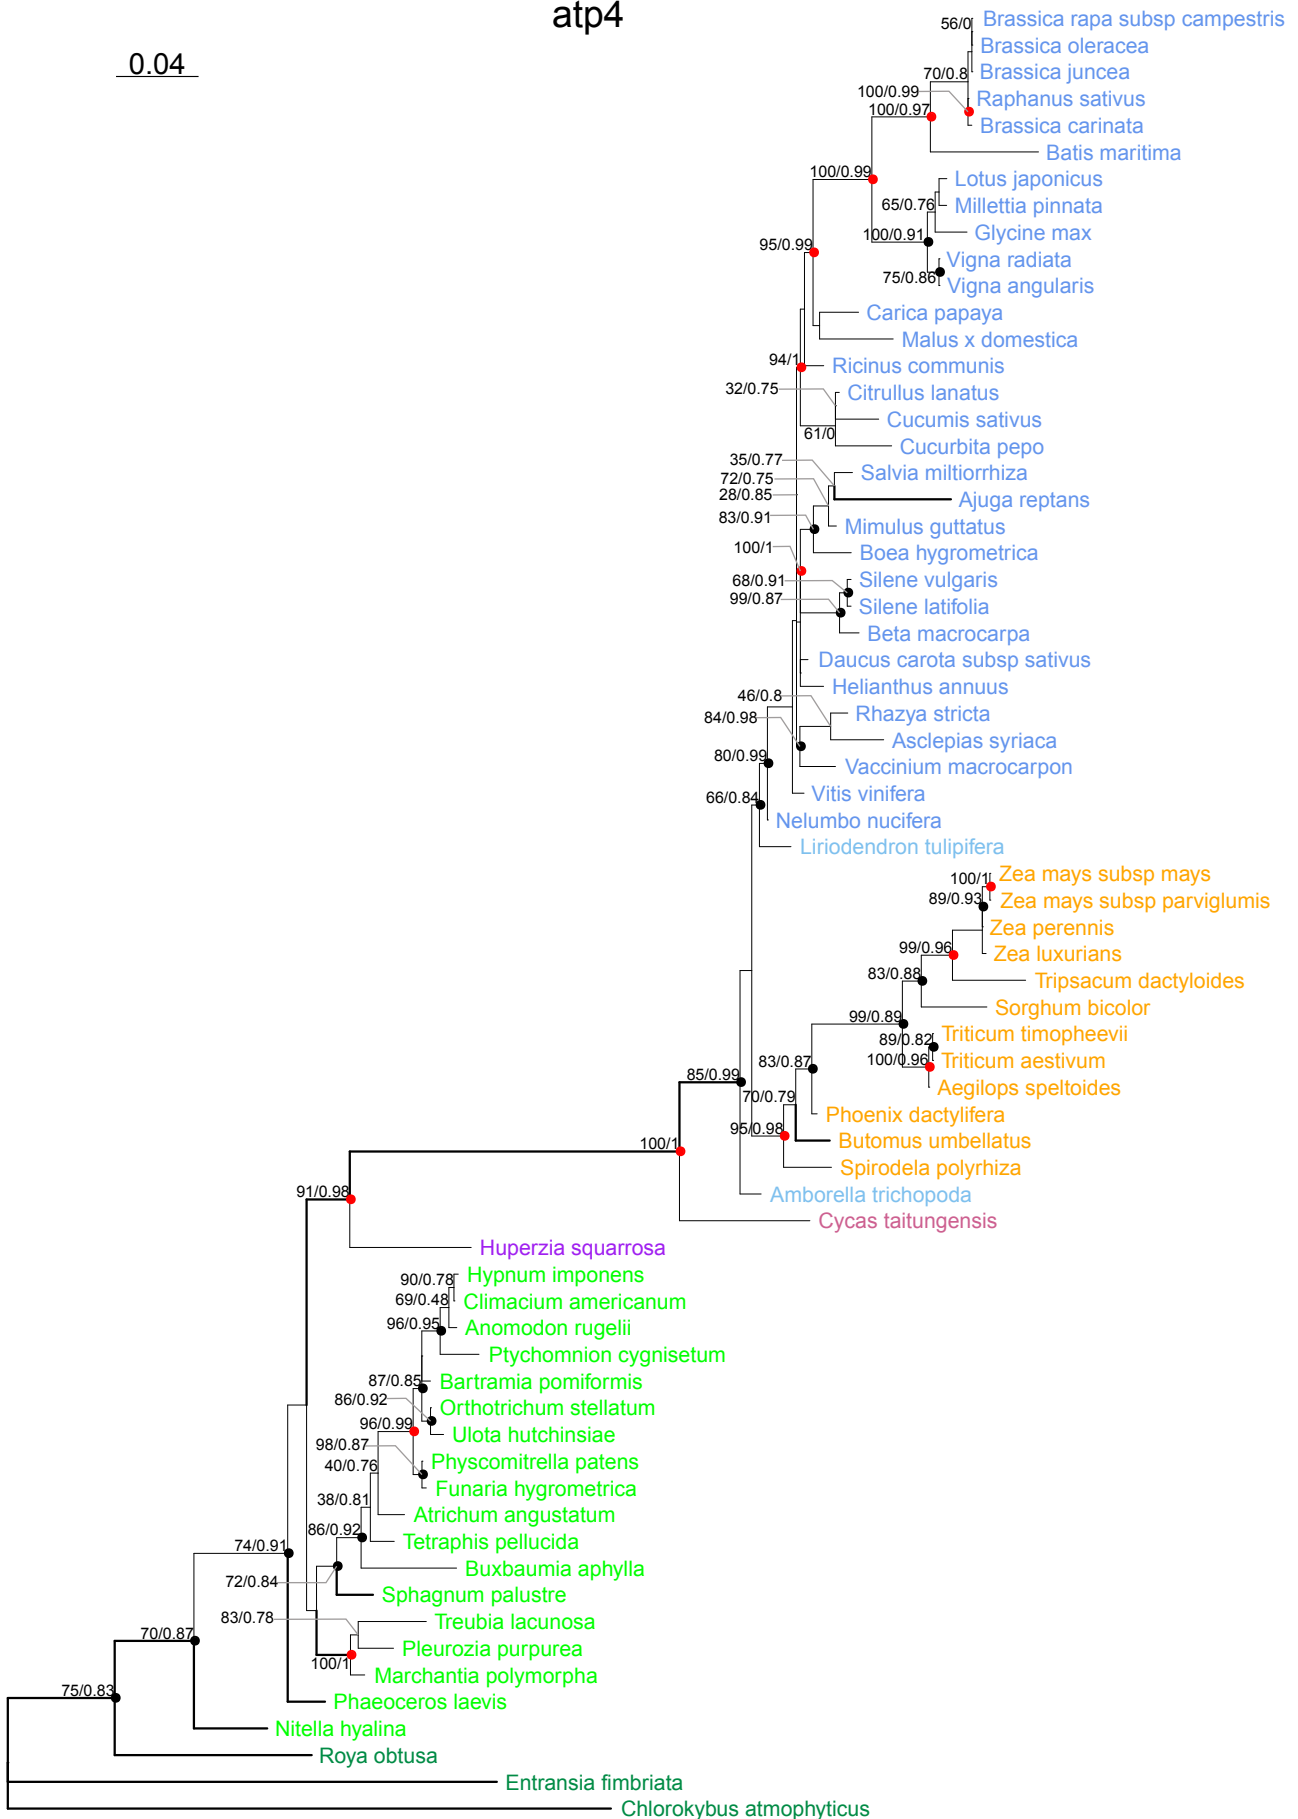



Figure S6 (continued)

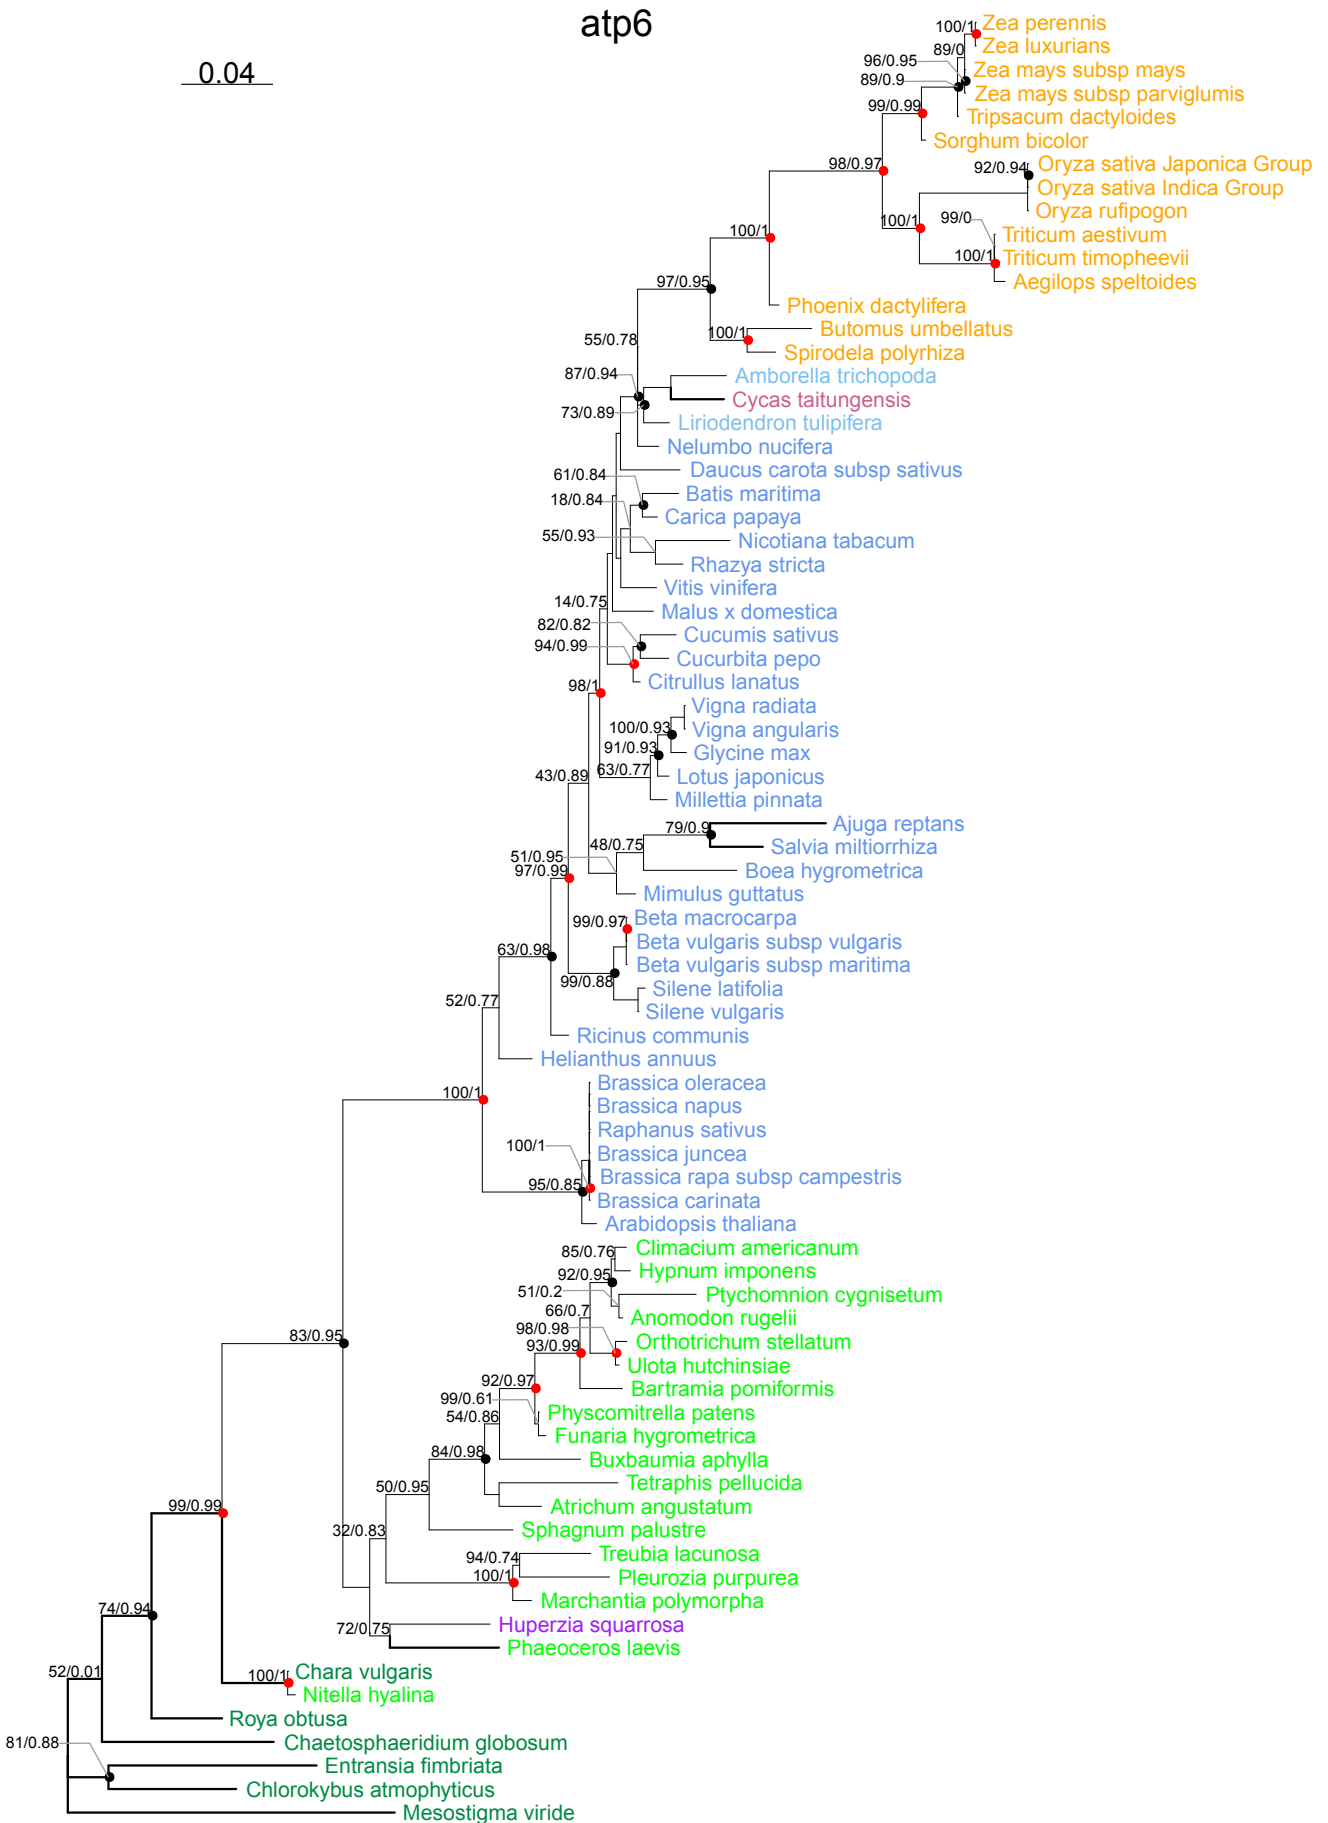

Figure S6 (continued)

atp8

0.1

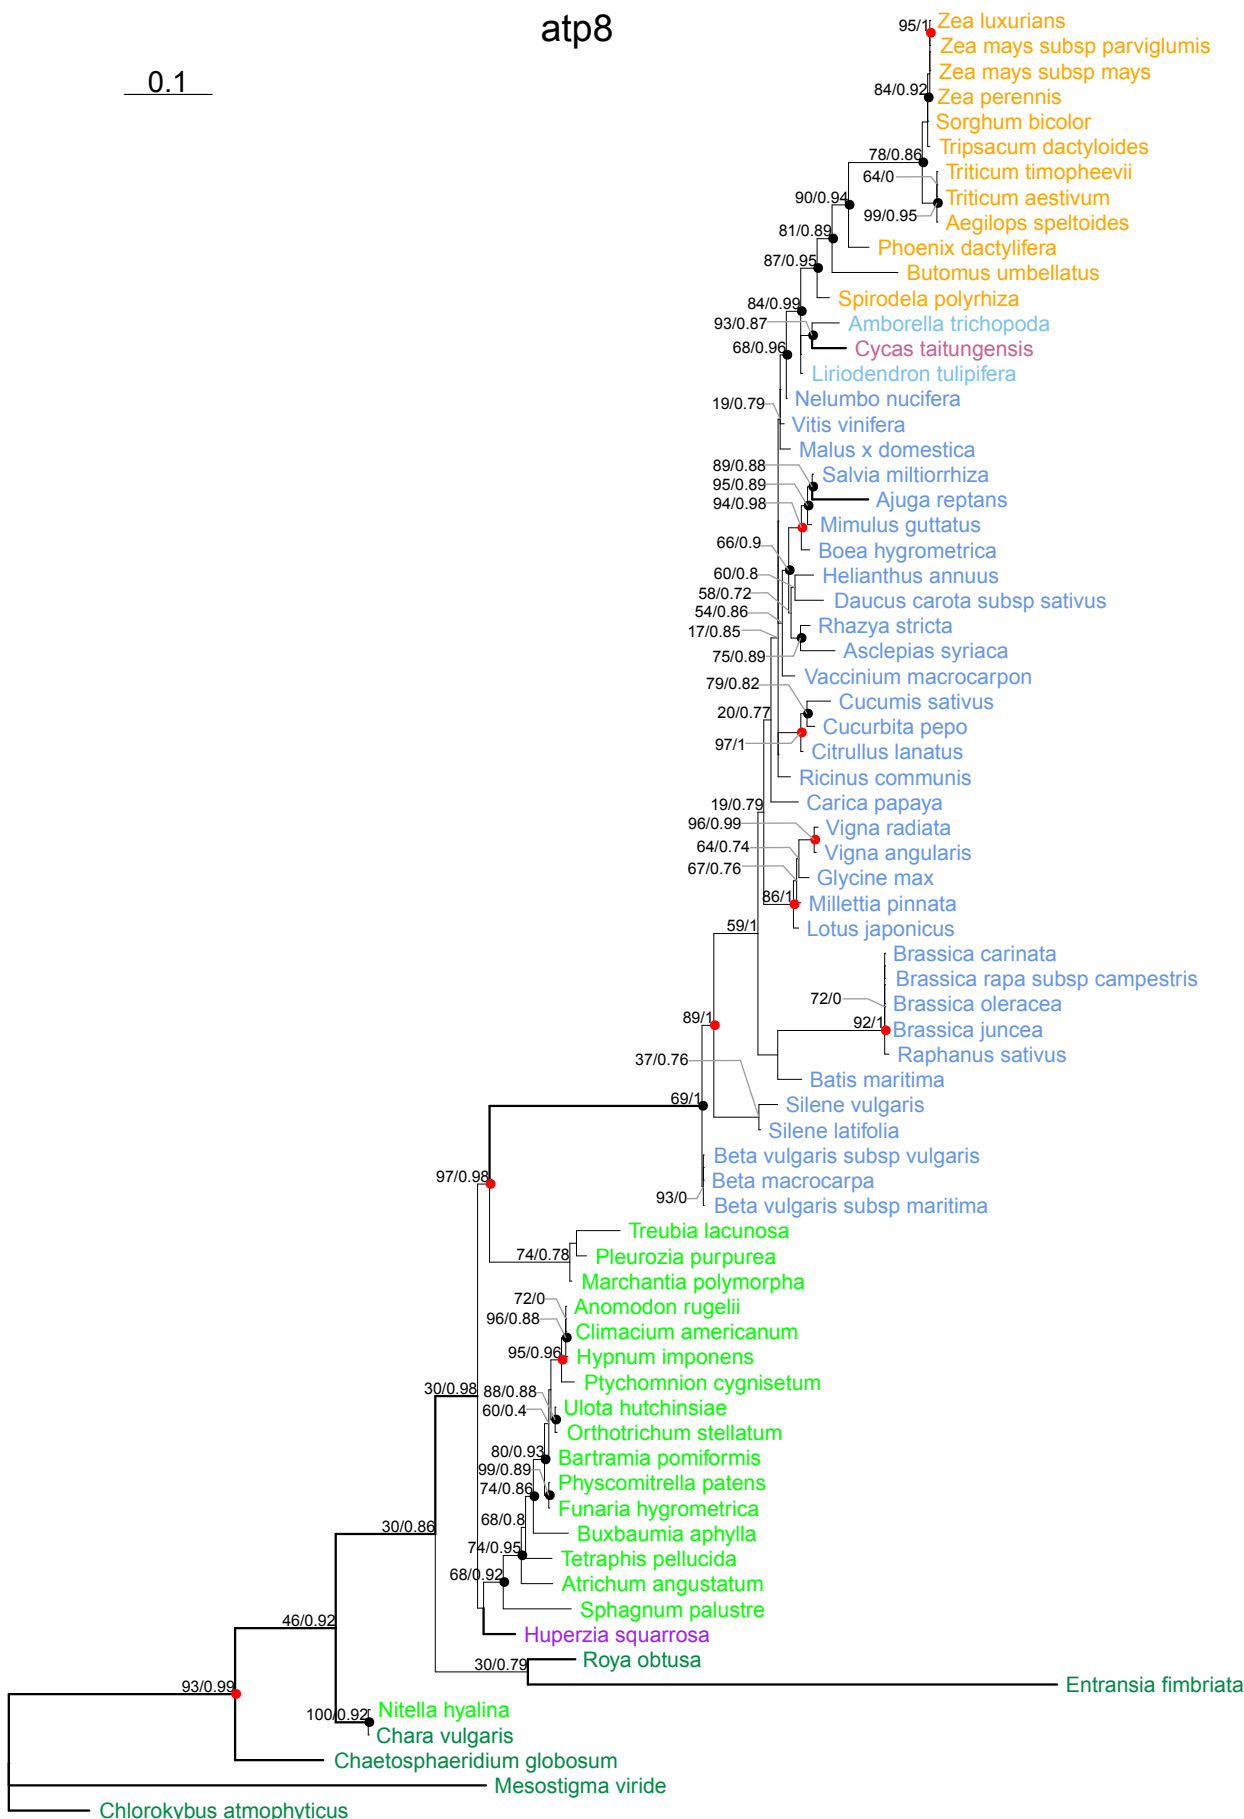

Figure S6 (continued)

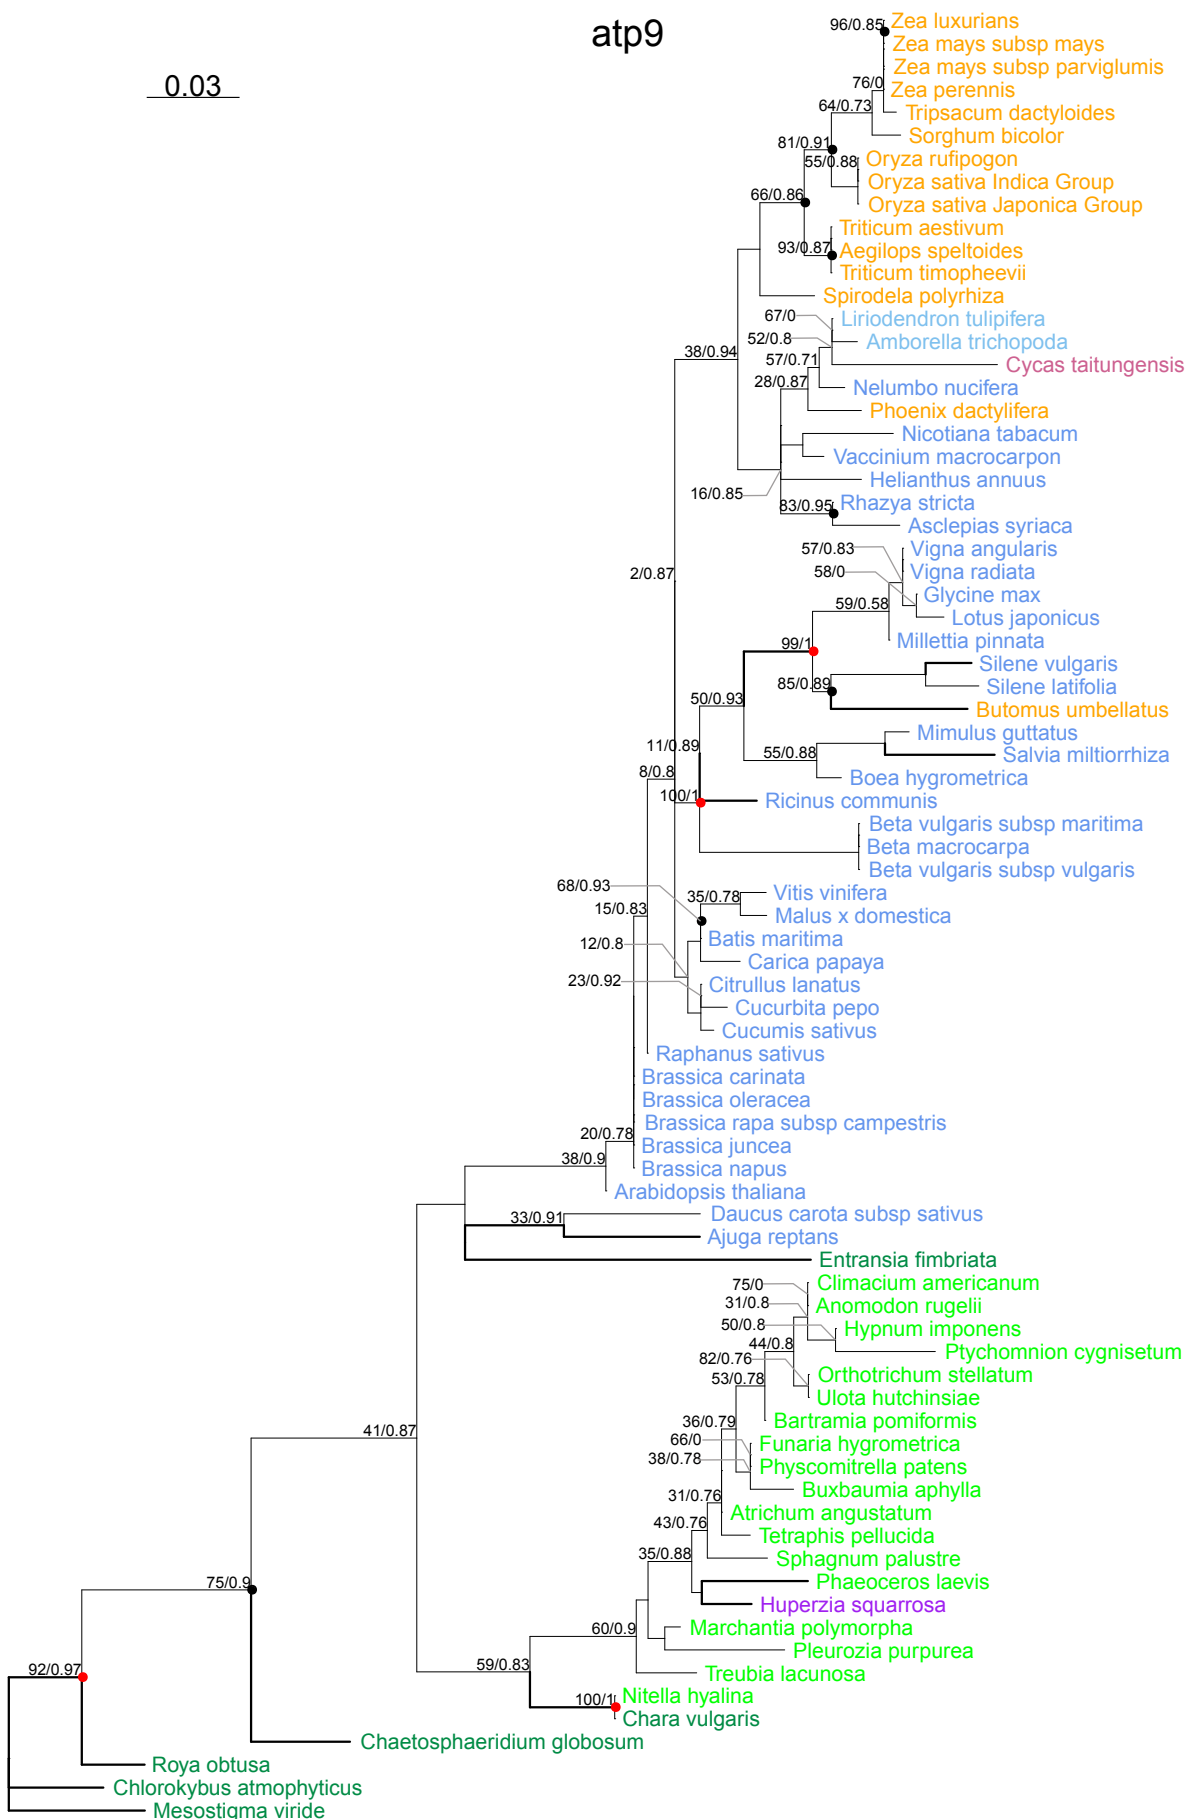

Figure S6 (continued)

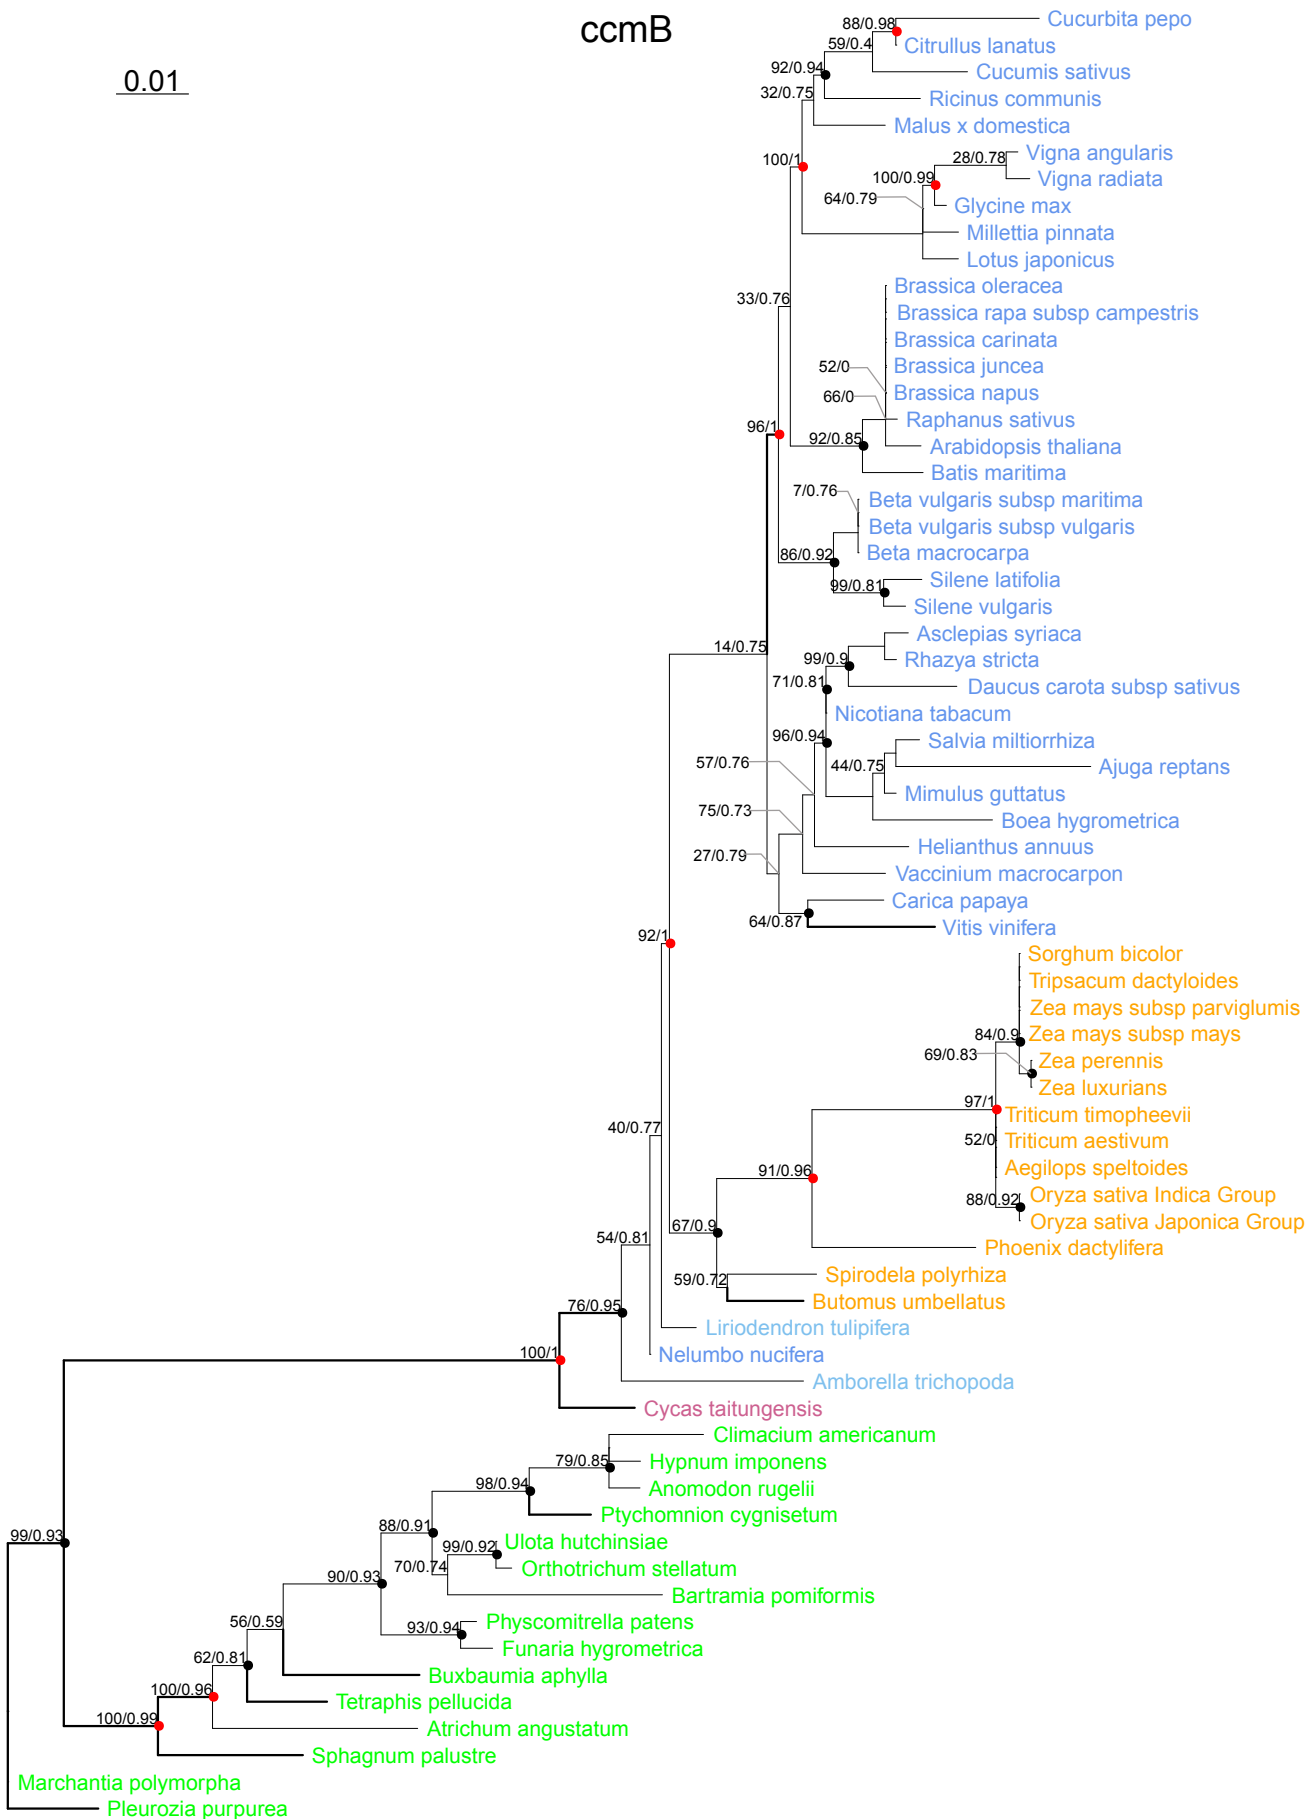

Figure S6 (continued)

ccmC

0.02

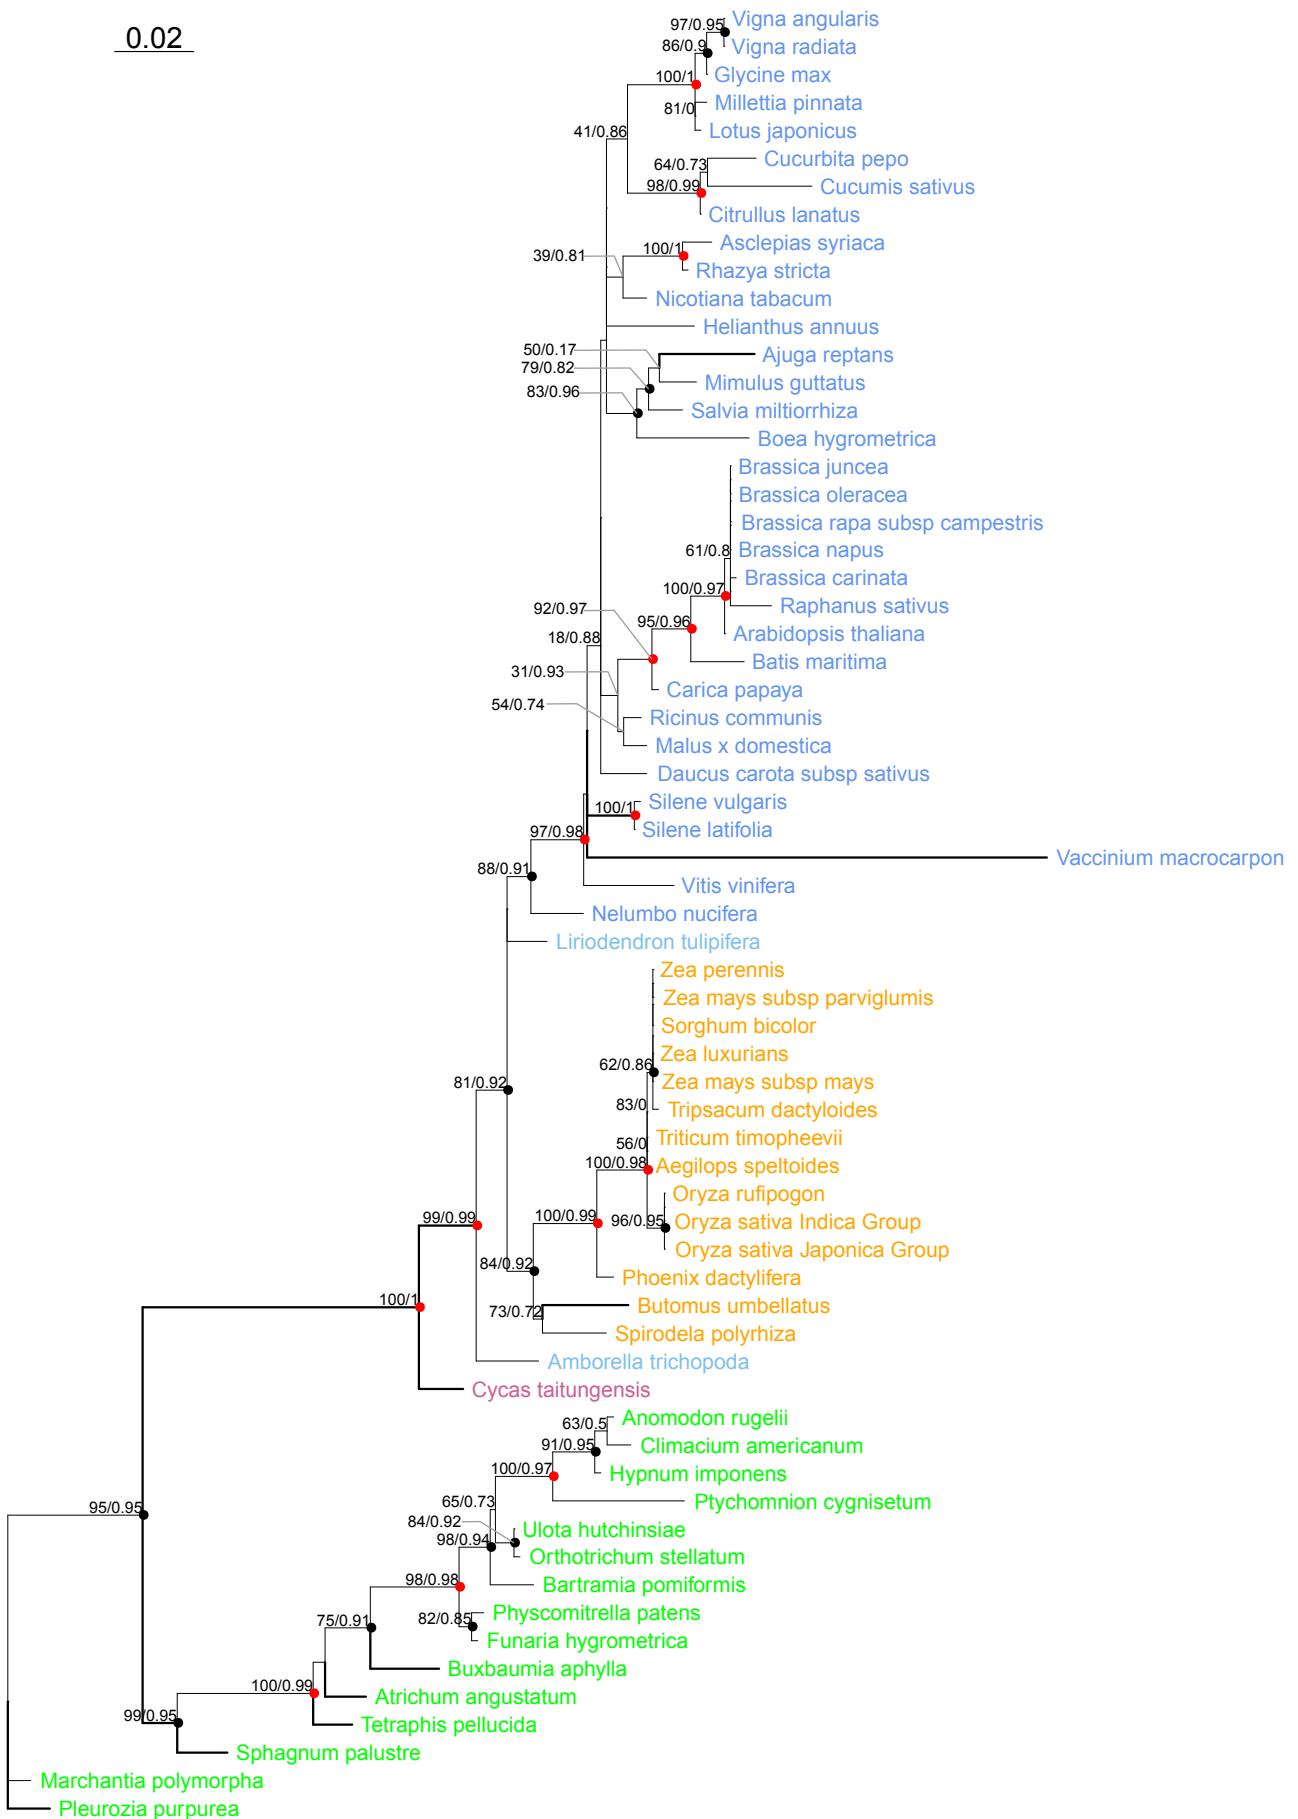

Figure S6 (continued)

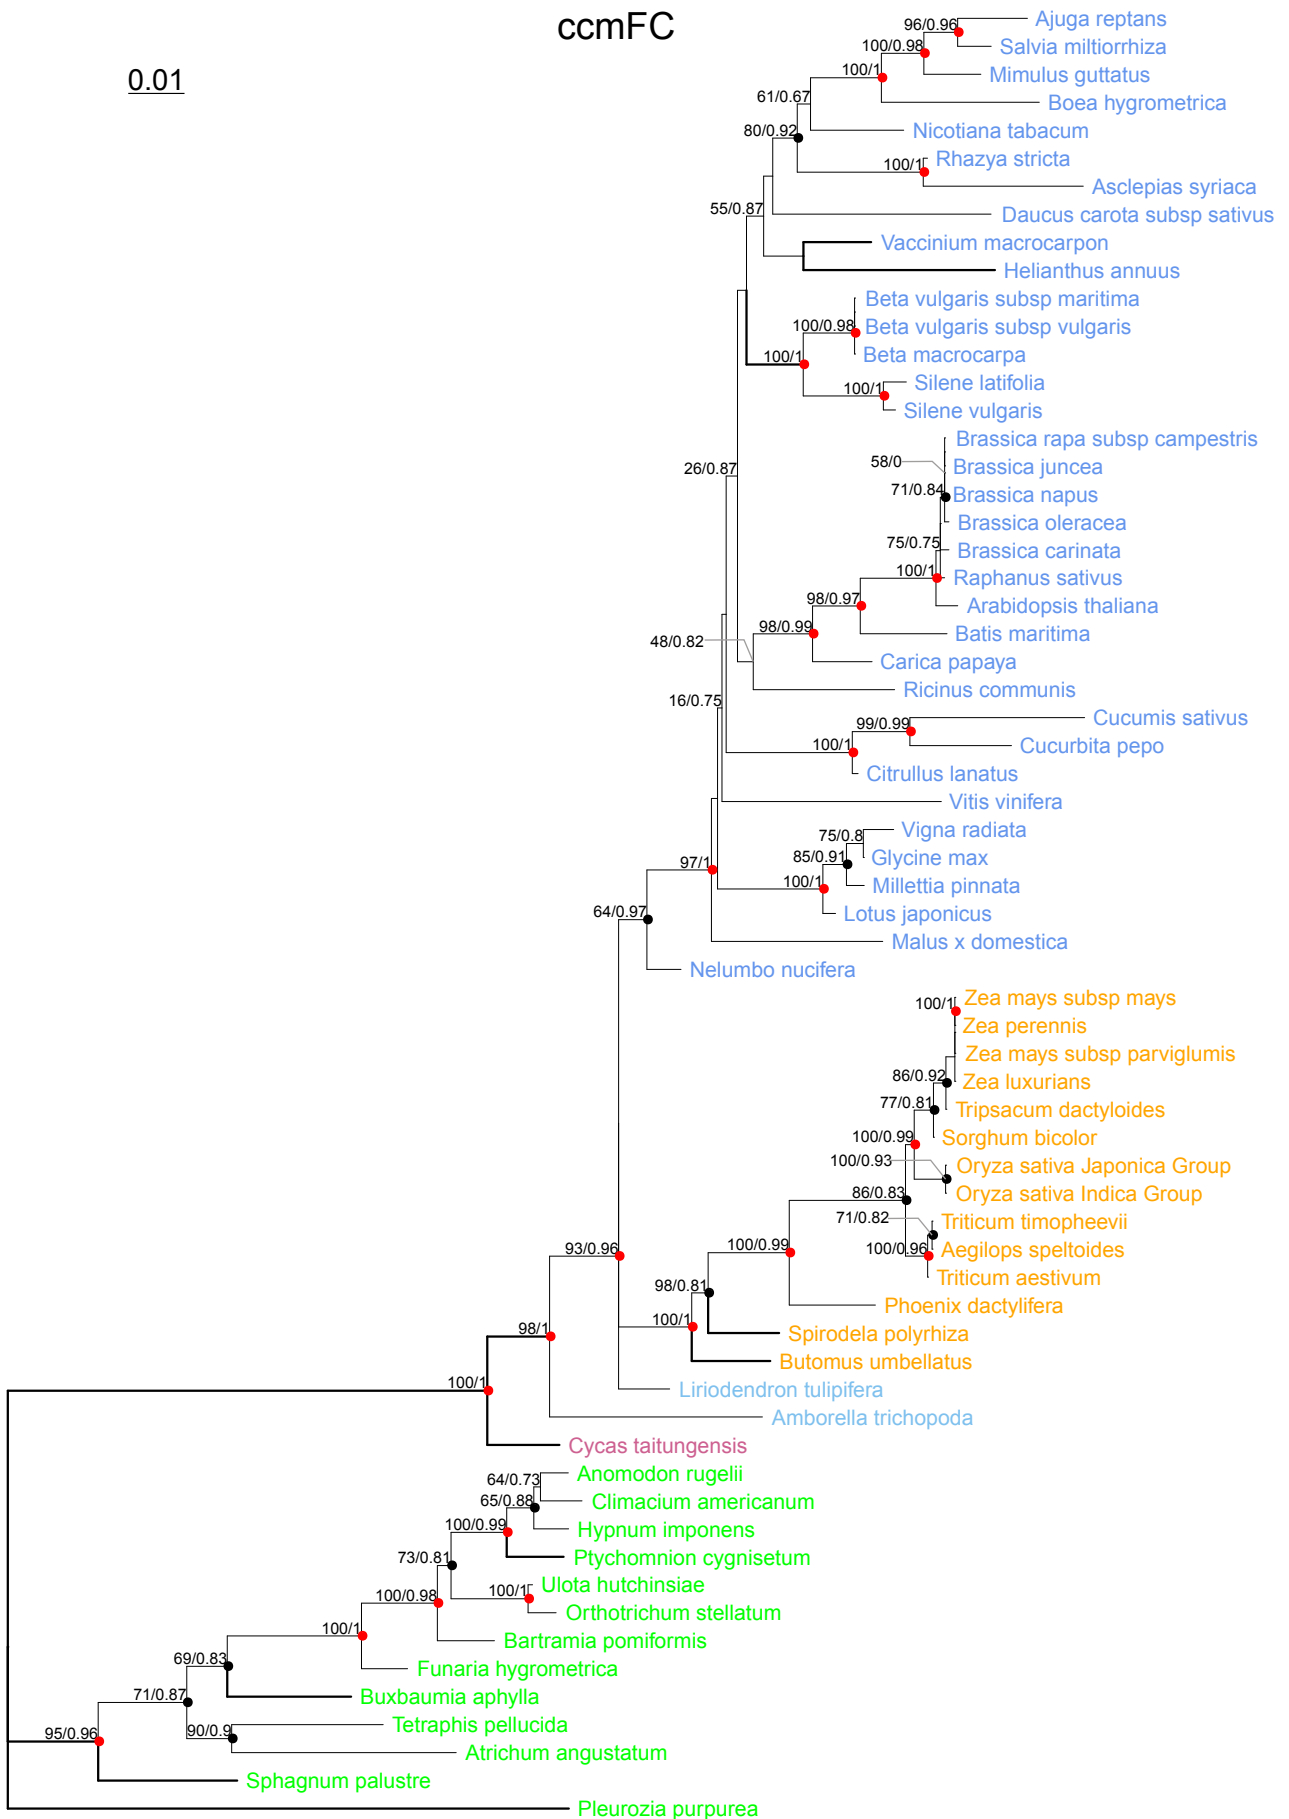

Figure S6 (continued)

ccmFN

0.02

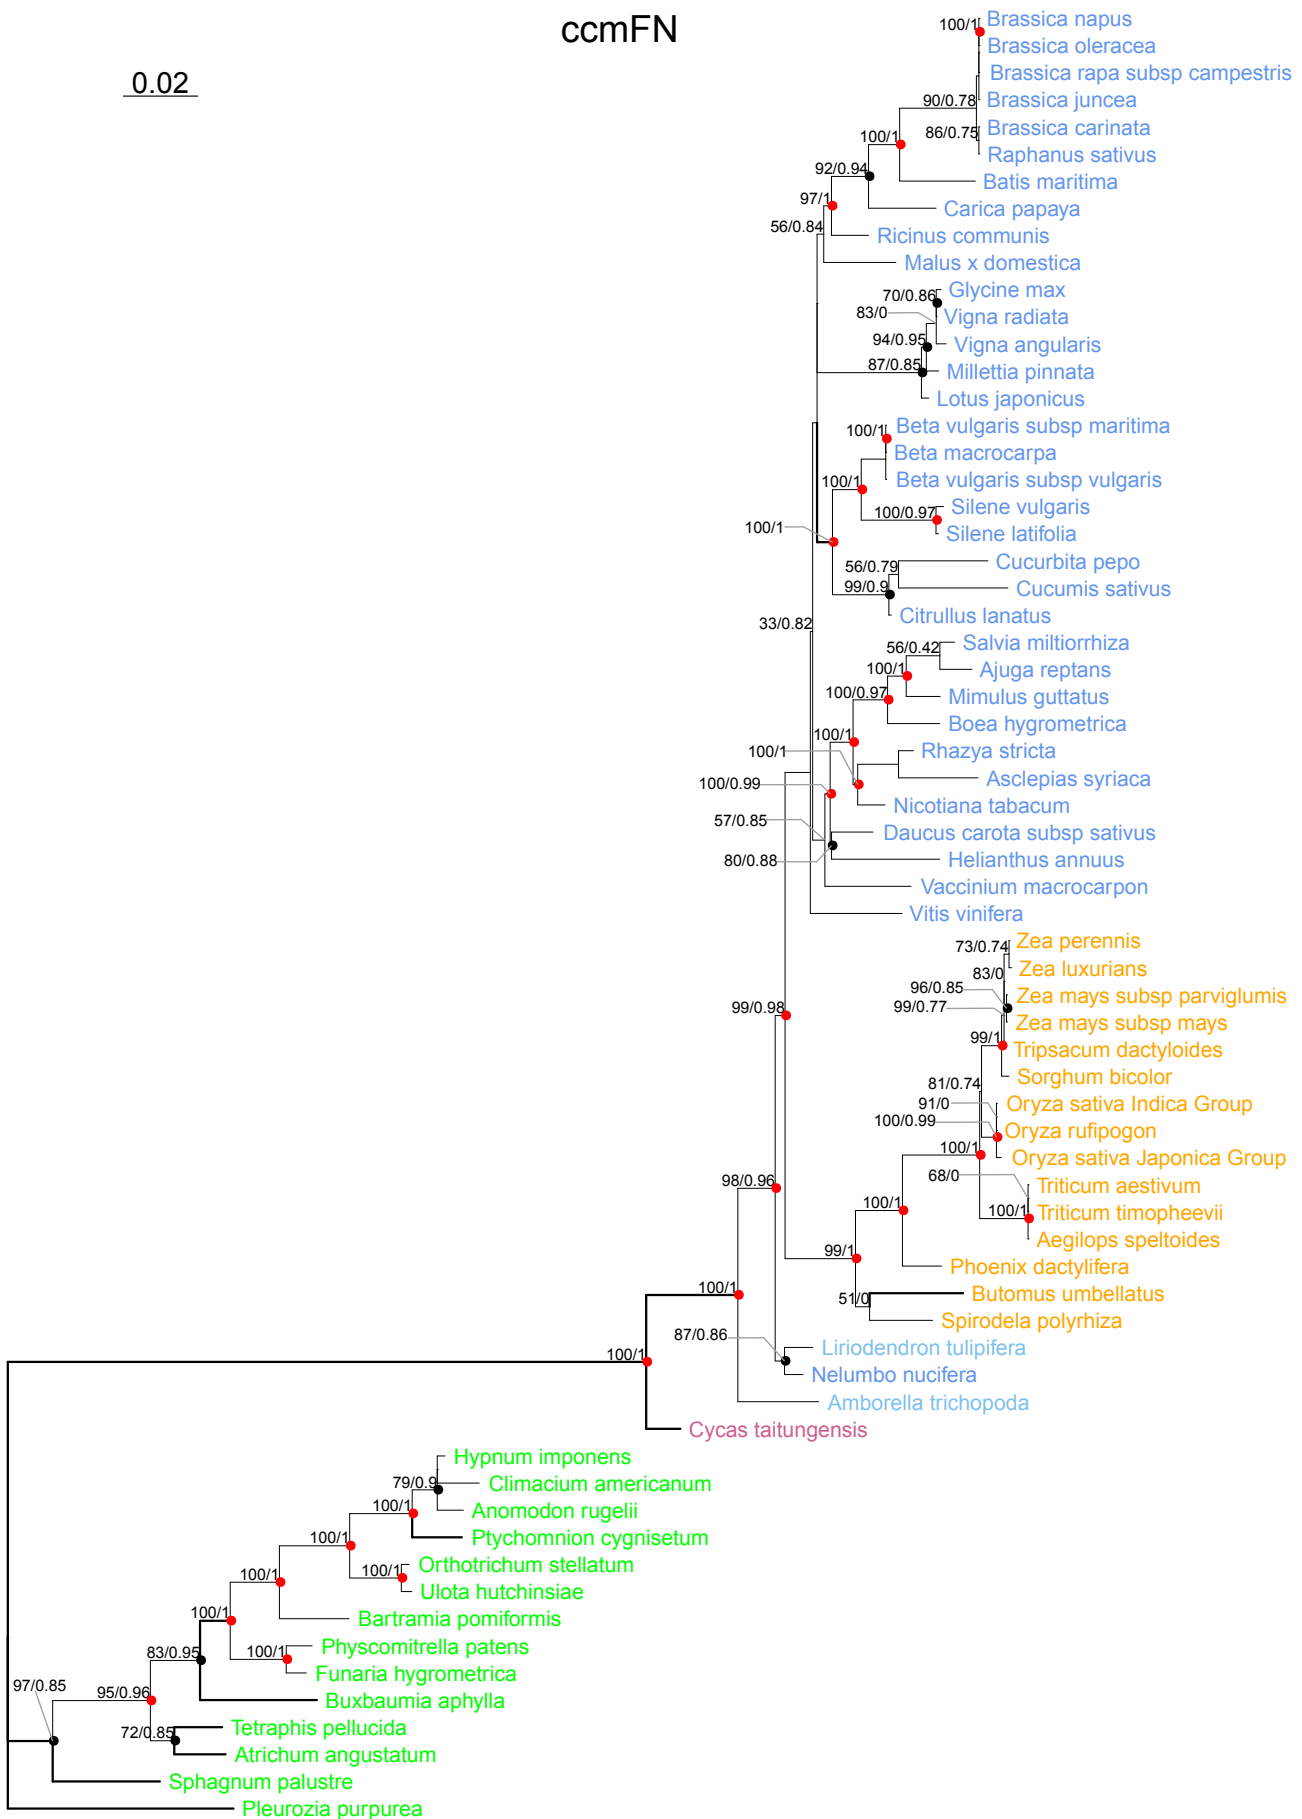

Figure S6 (continued)

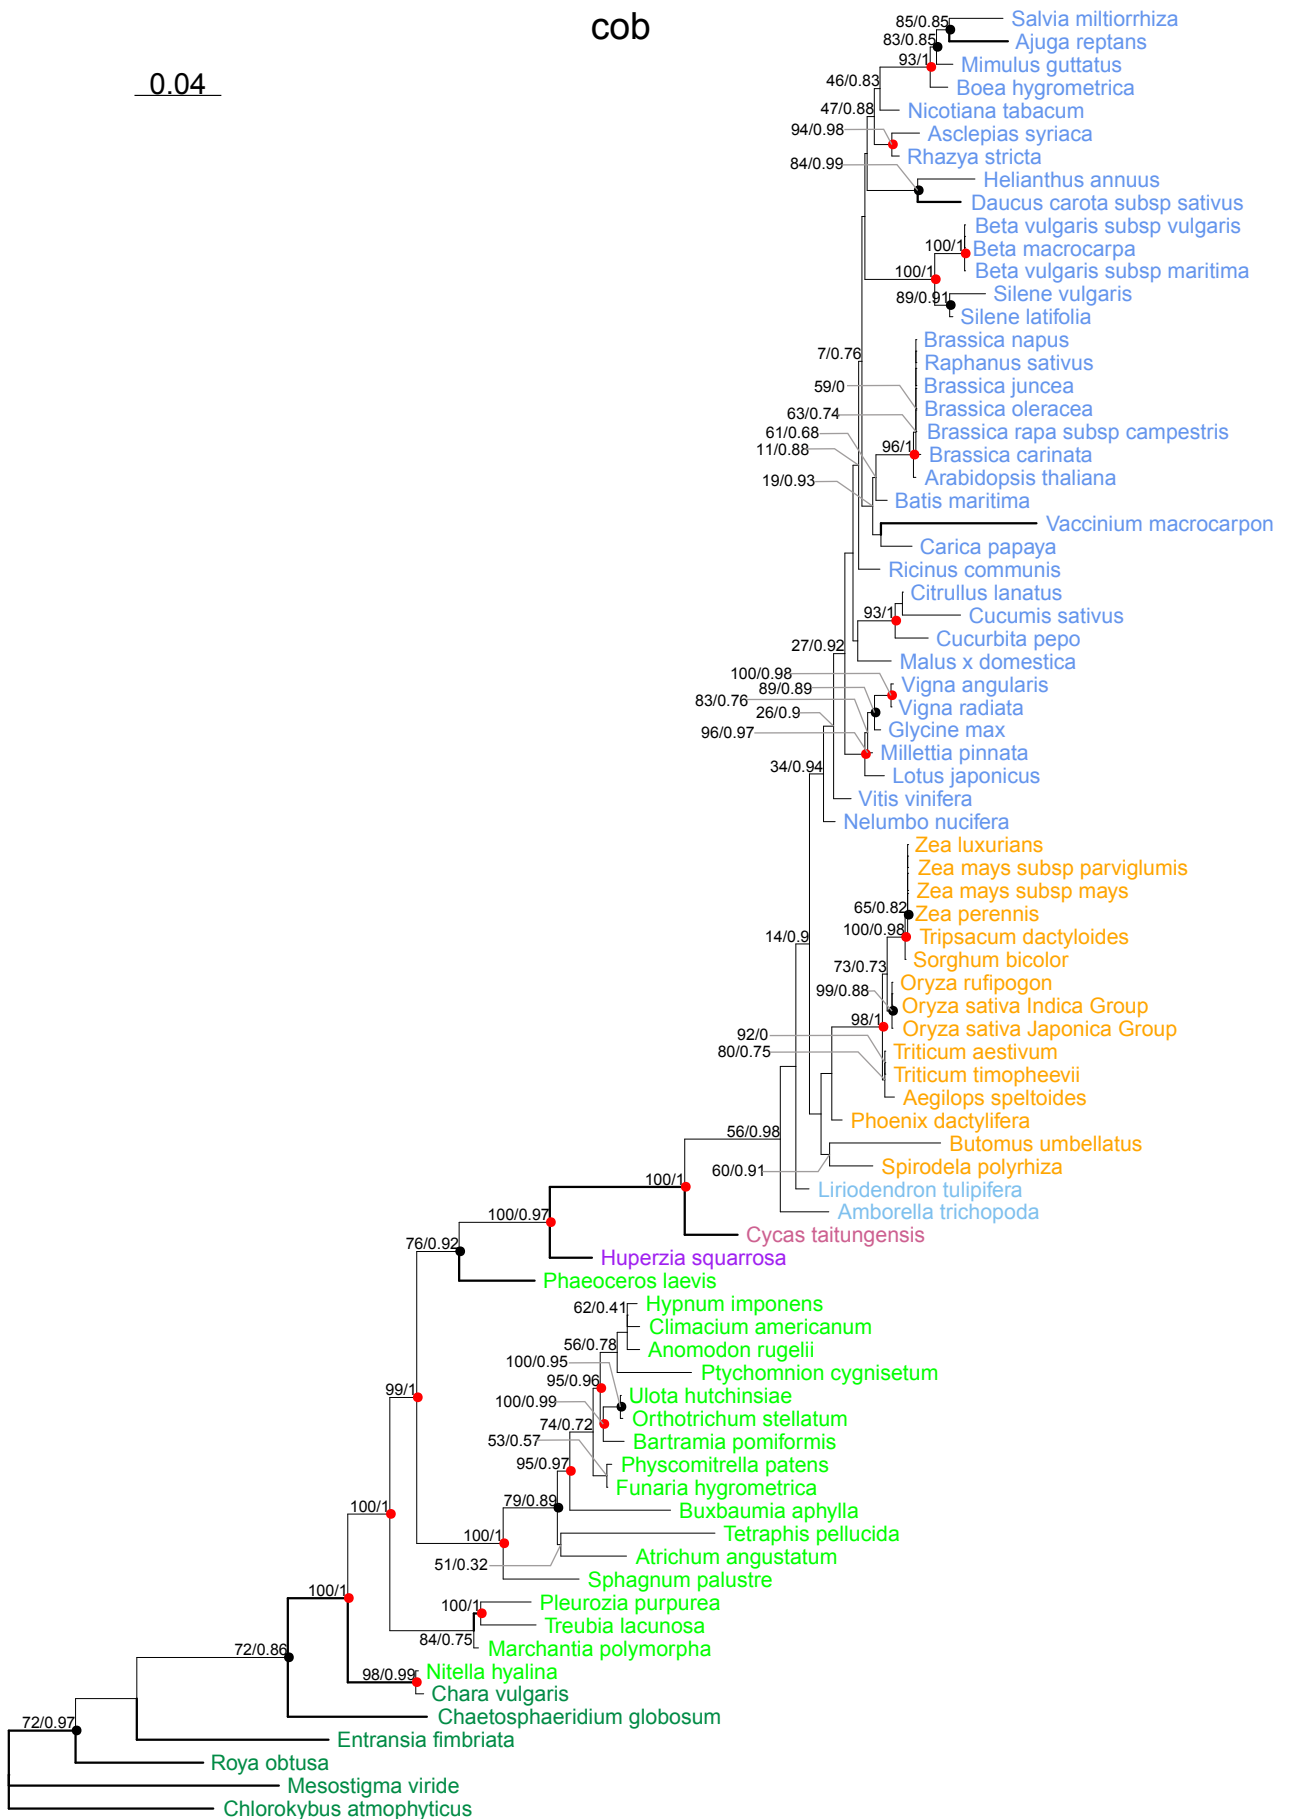



Figure S6 (continued)

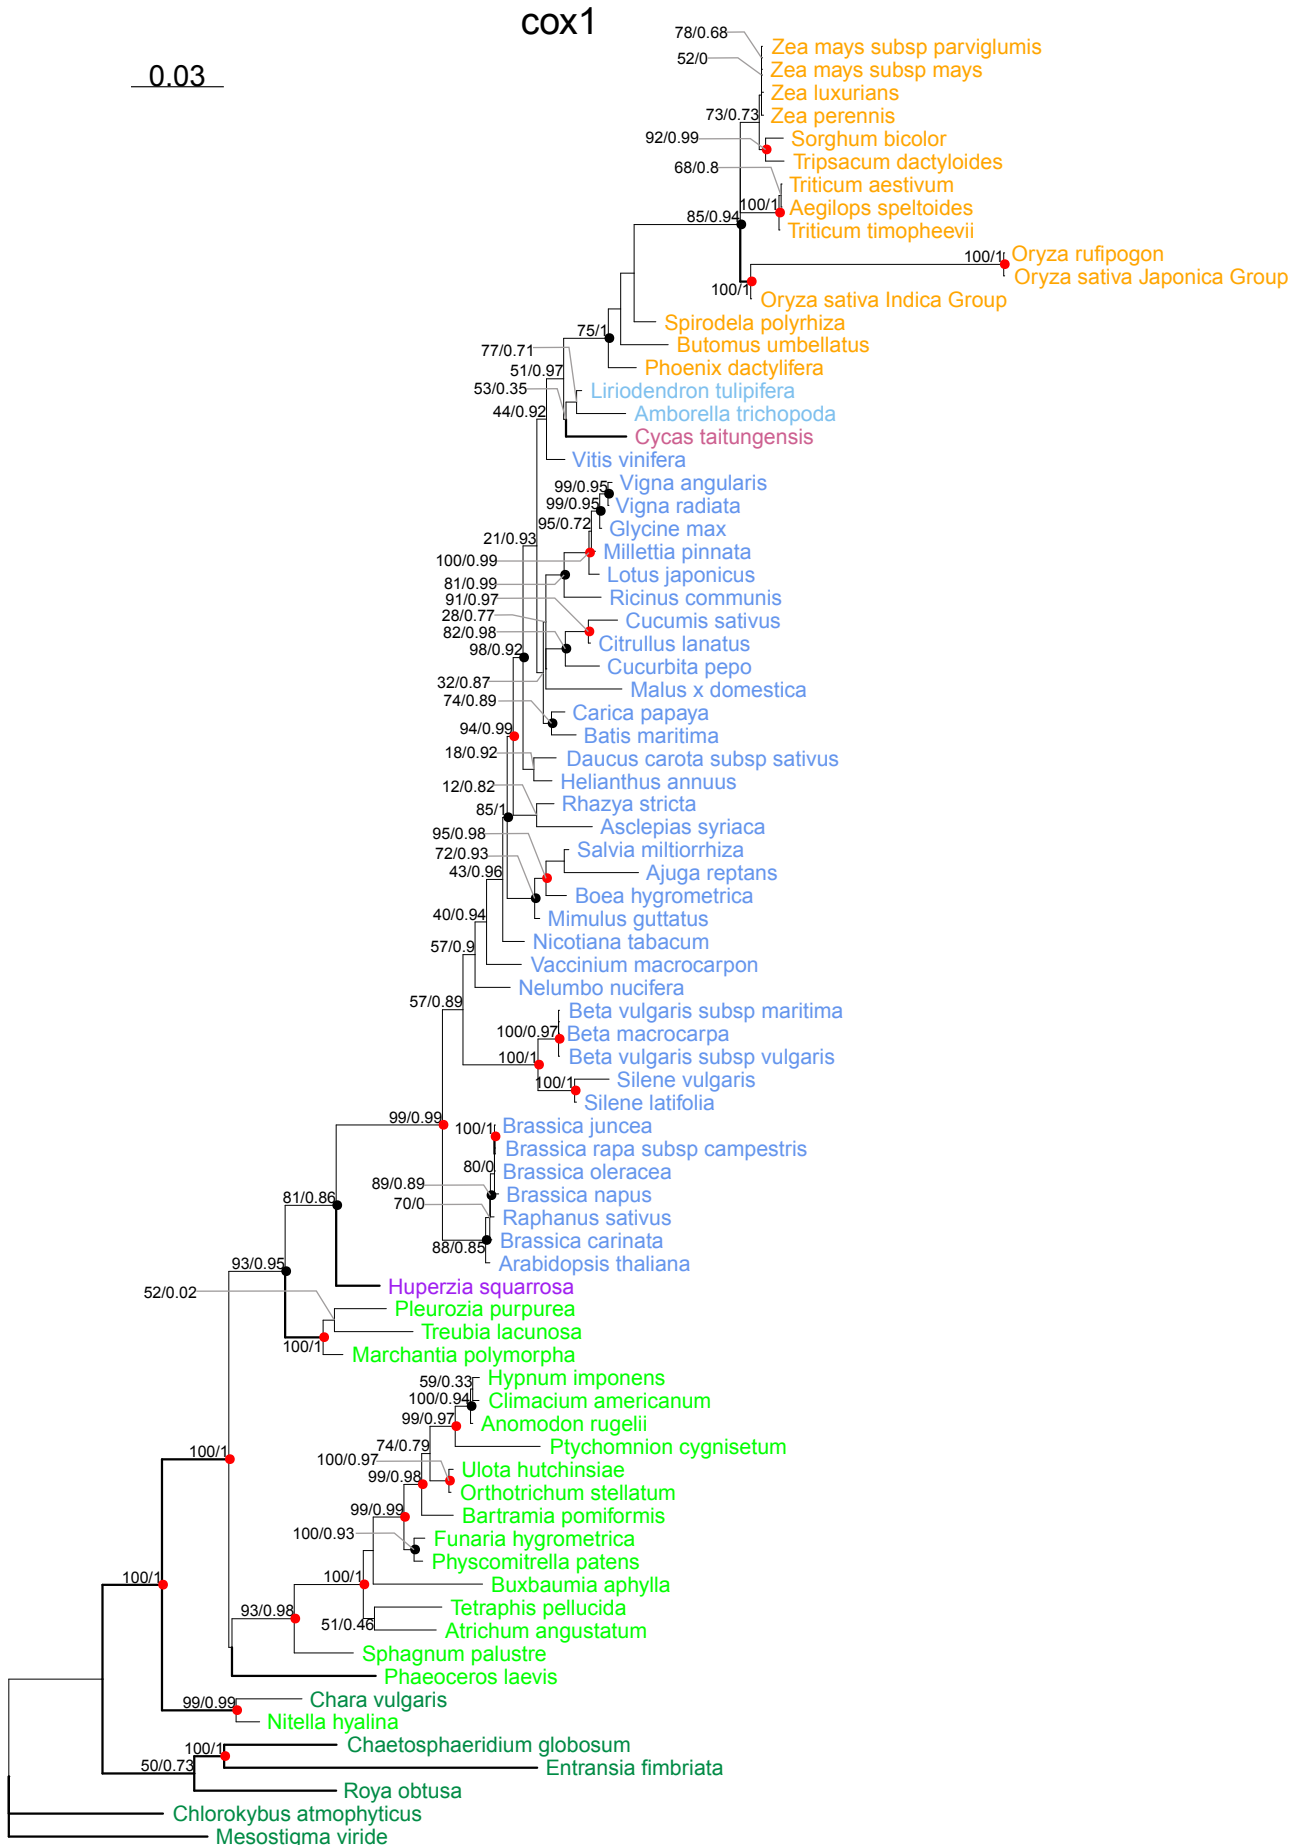

Figure S6 (continued)

cox2

0.04

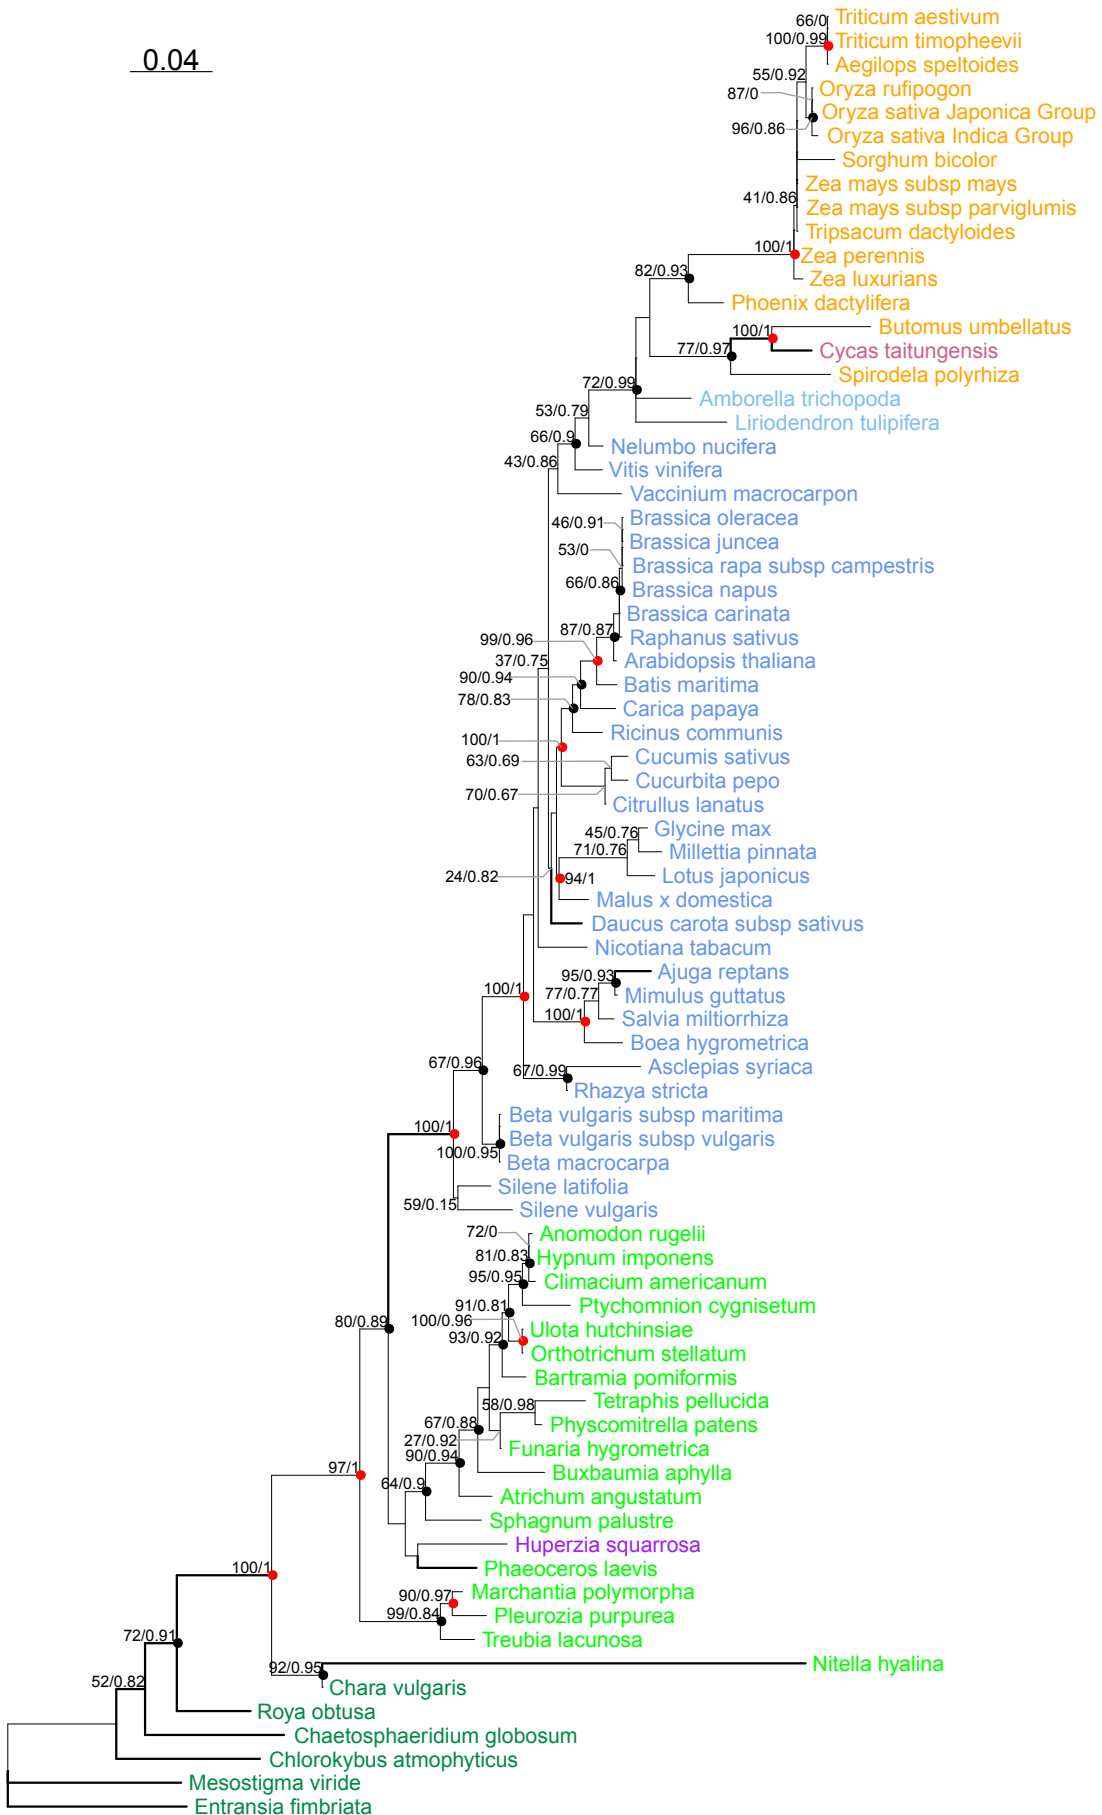

Figure S6 (continued)

COX3

0.03

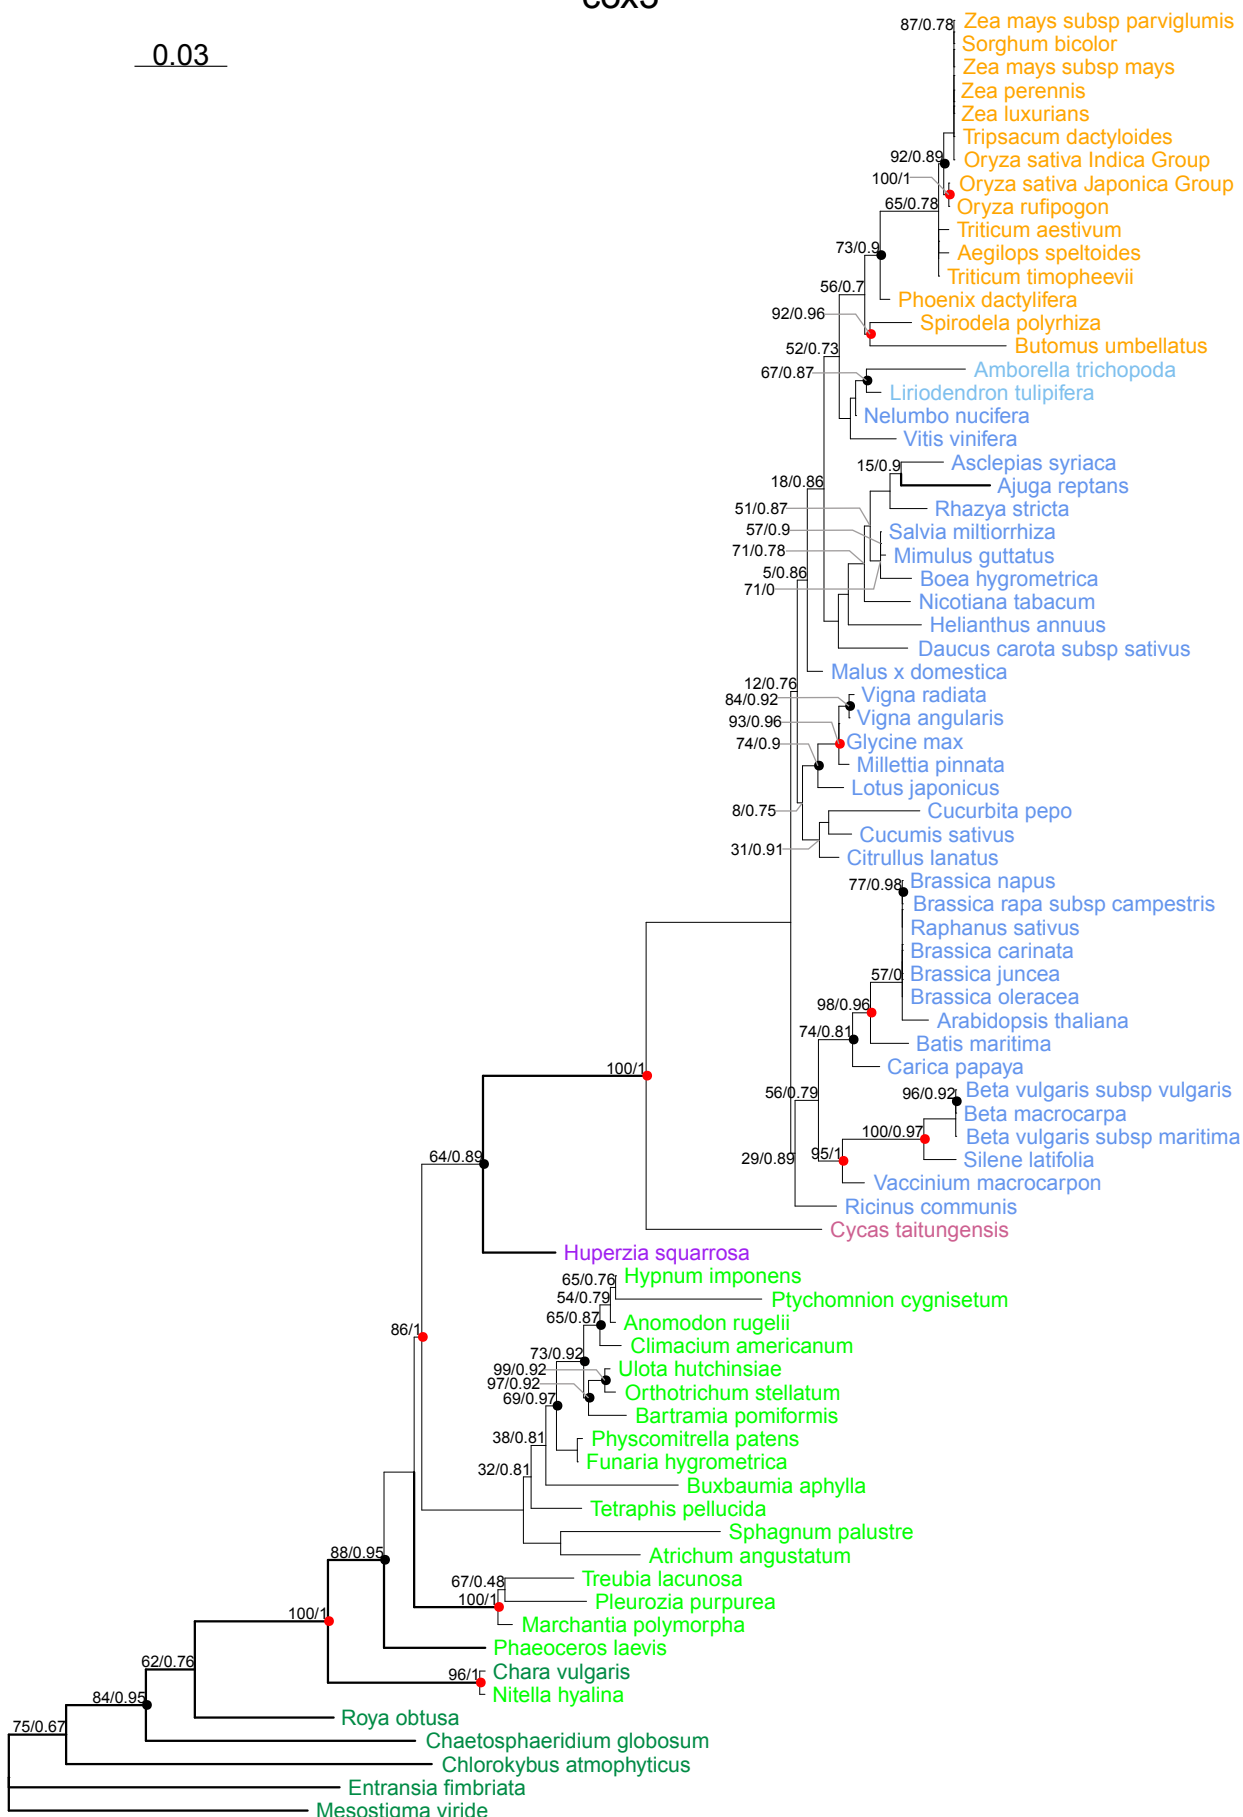

Figure S6 (continued)

matR

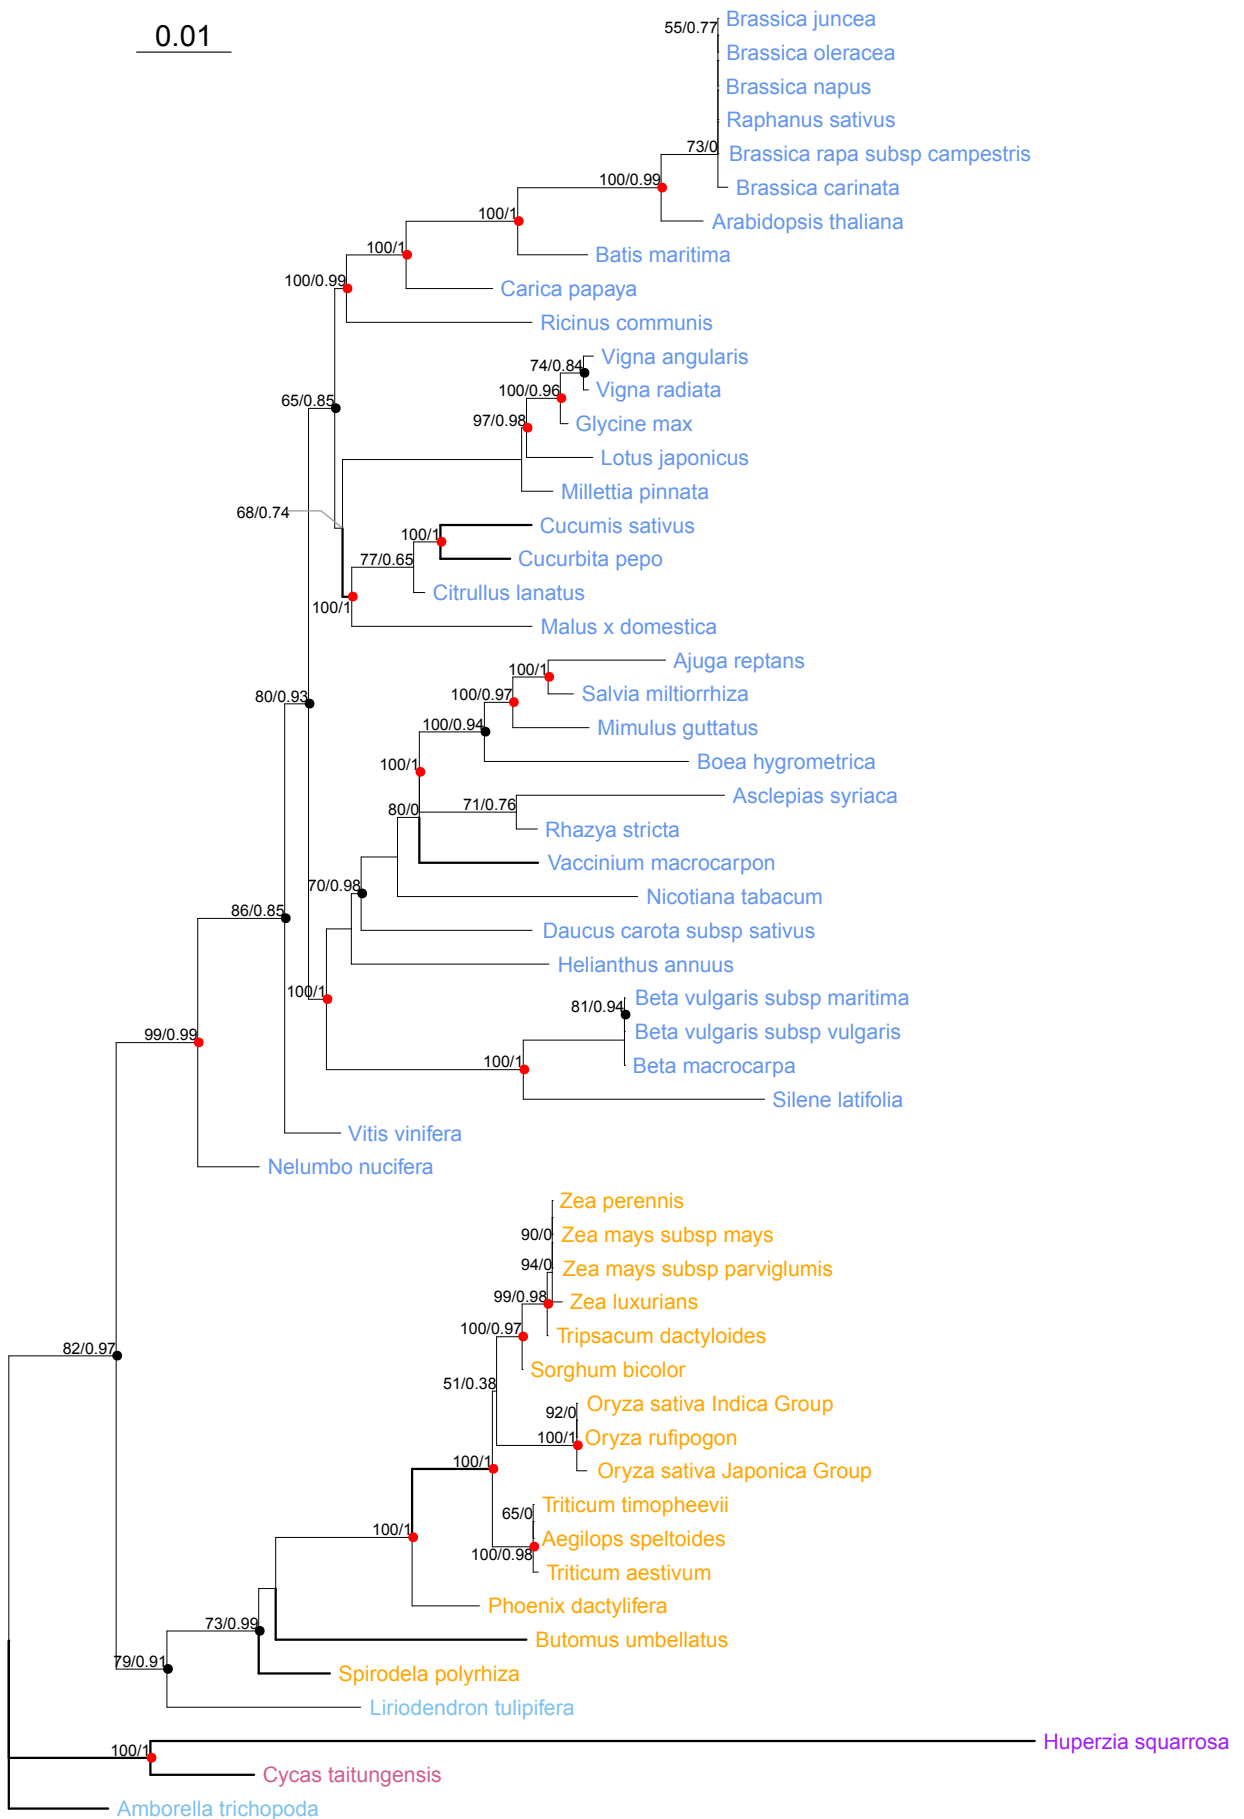

Figure S6 (continued)

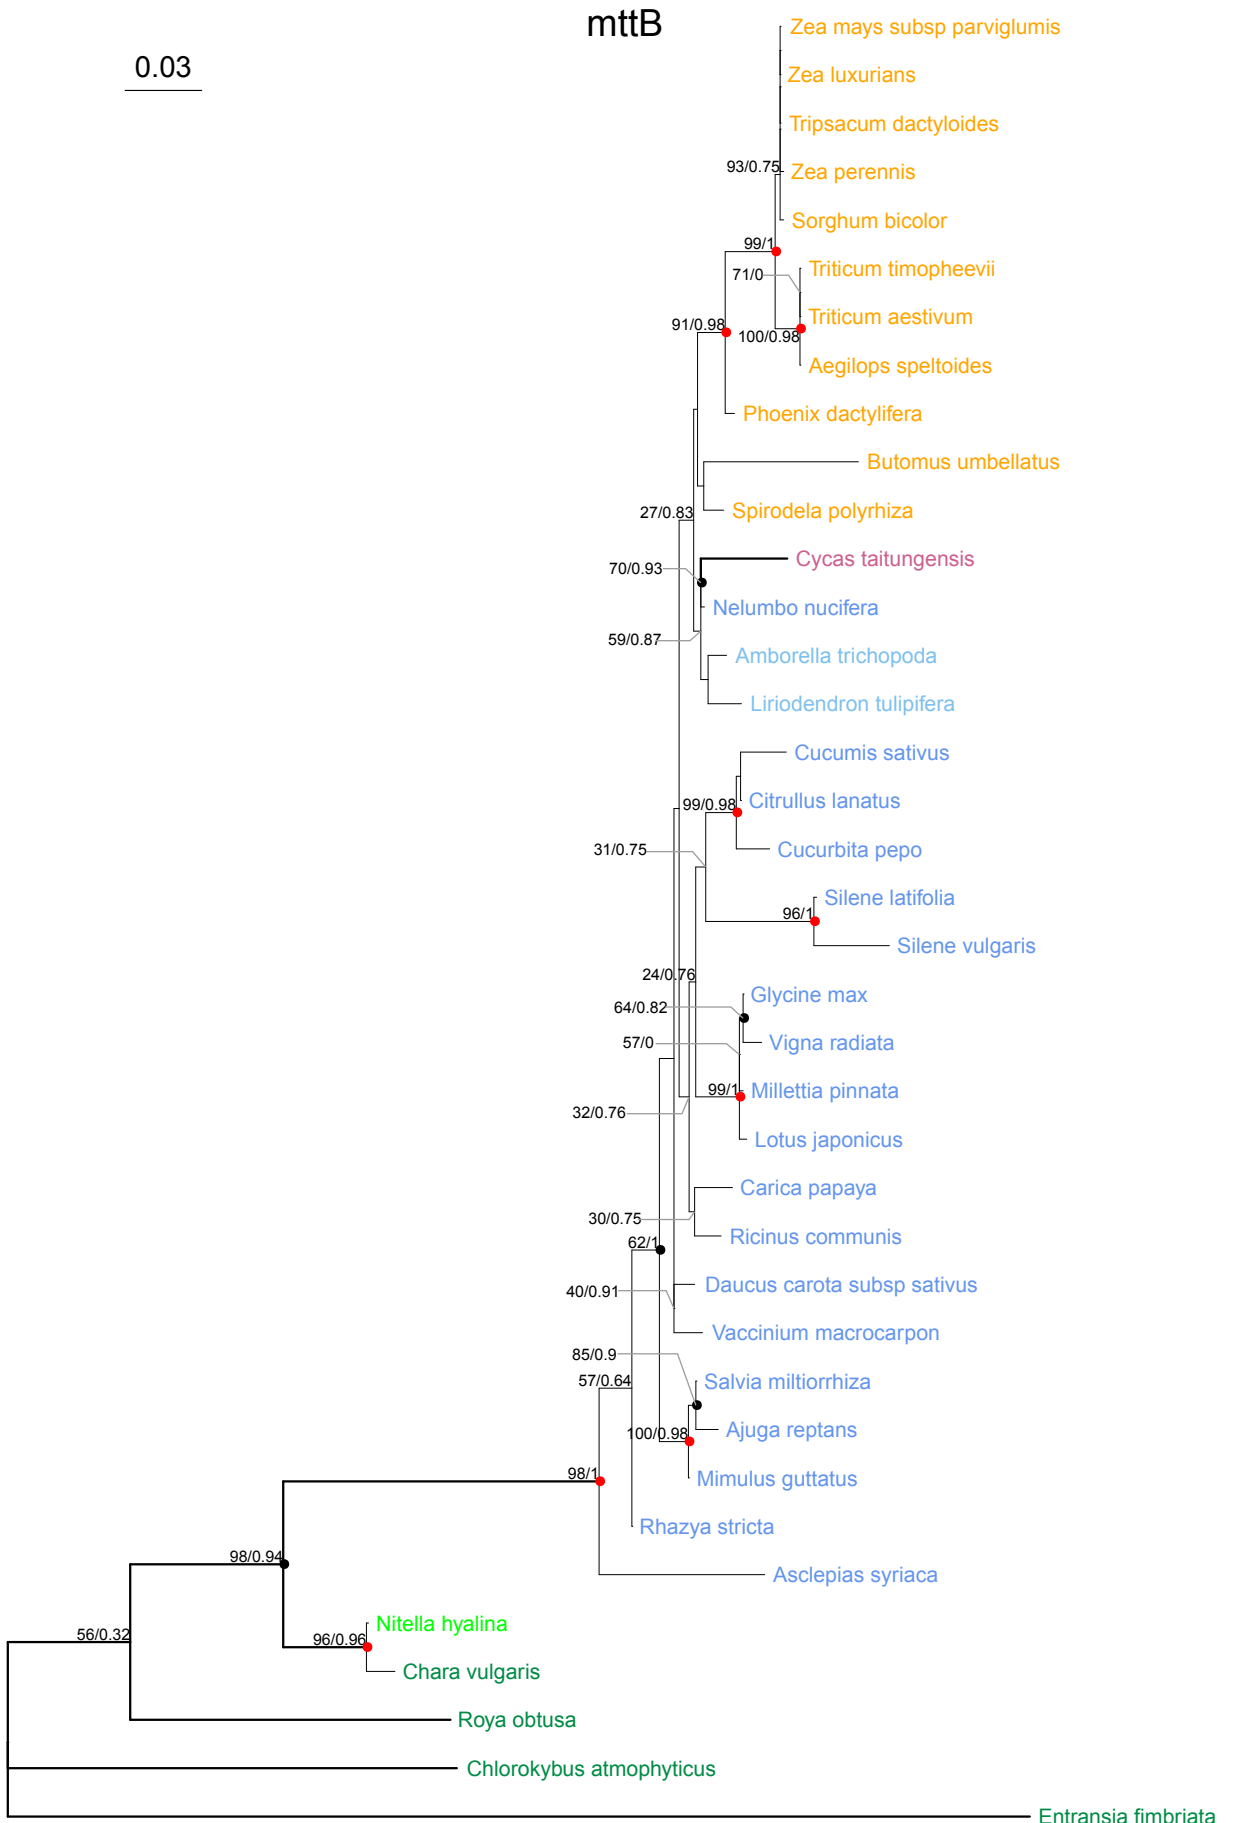

Figure S6 (continued)

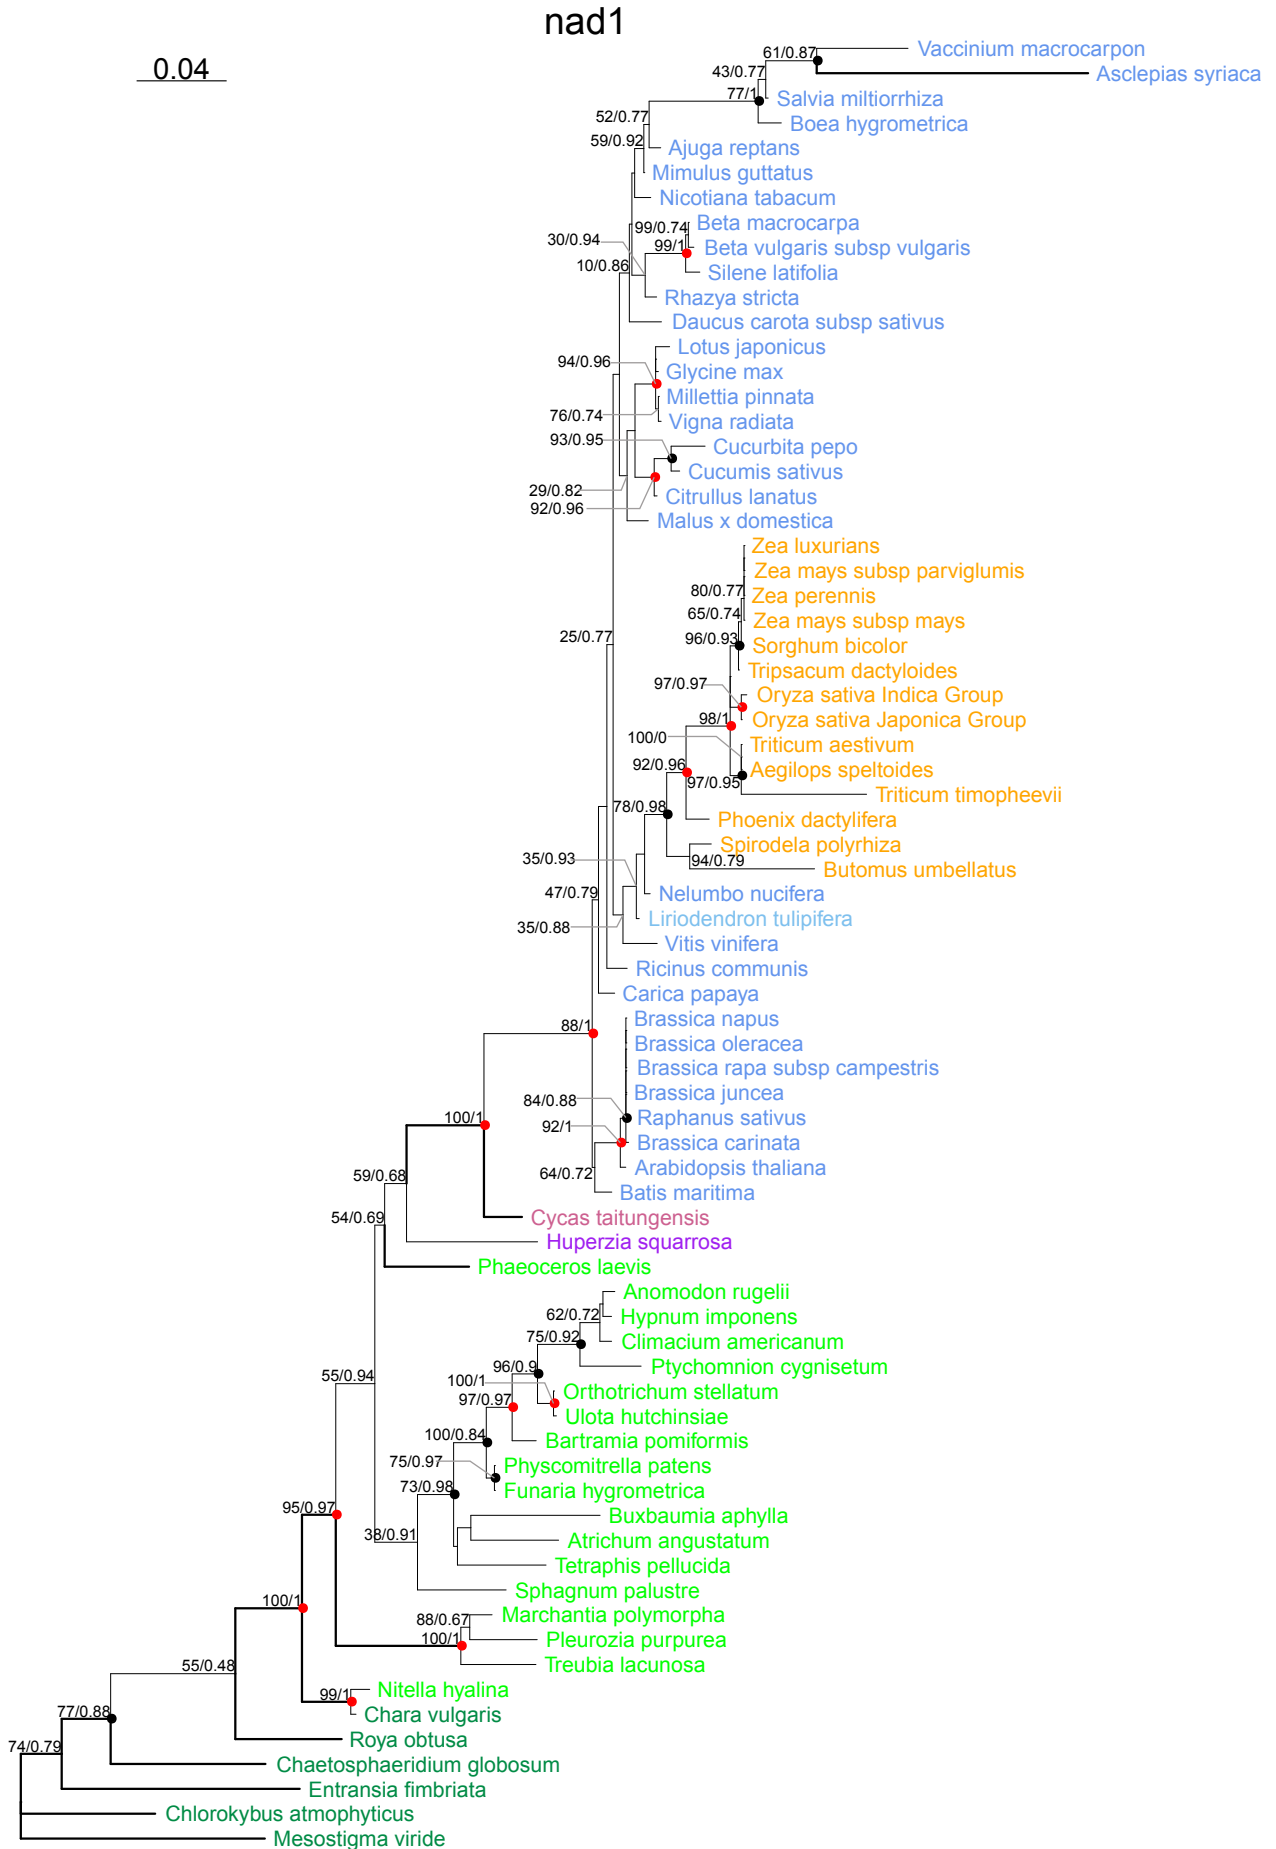

Figure S6 (continued)

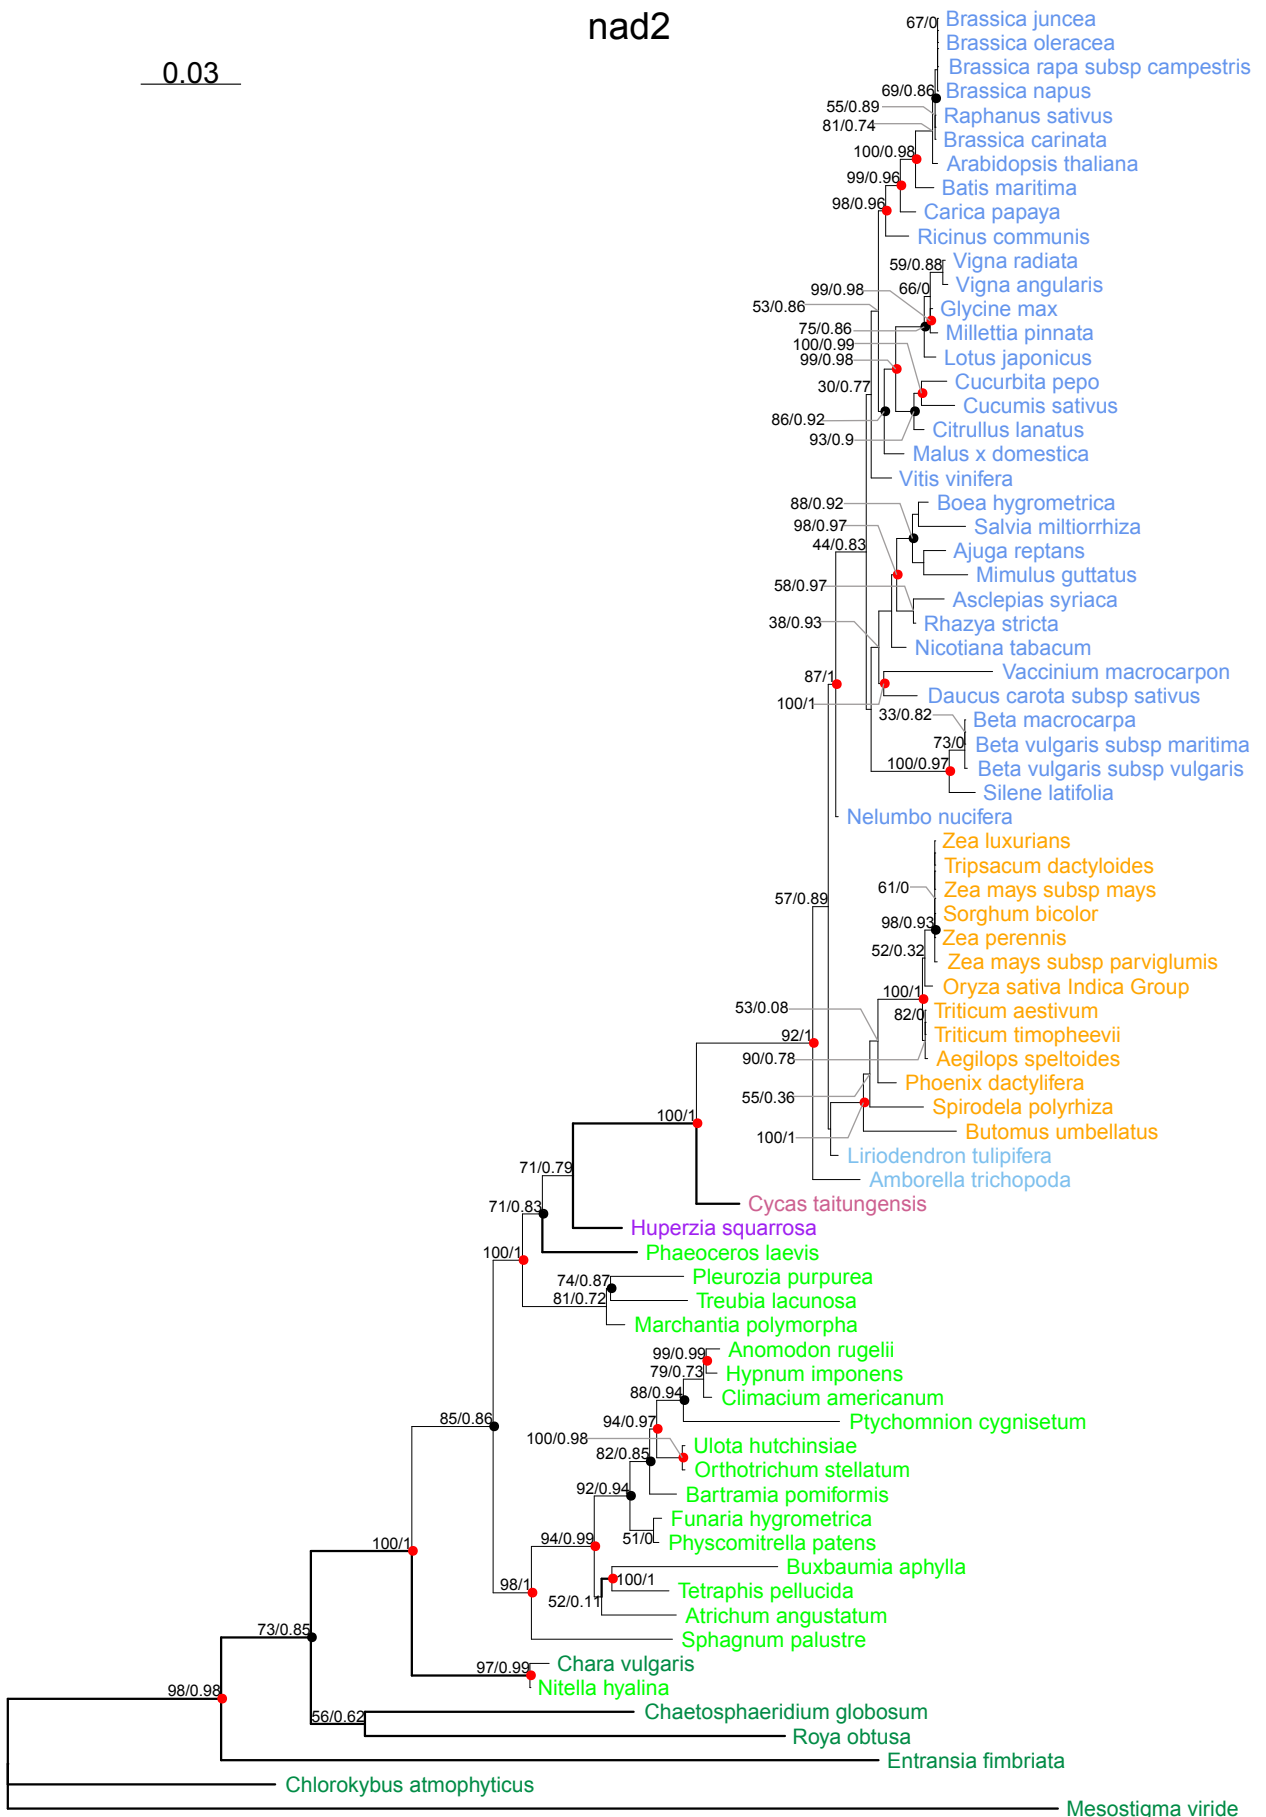

Figure S6 (continued)

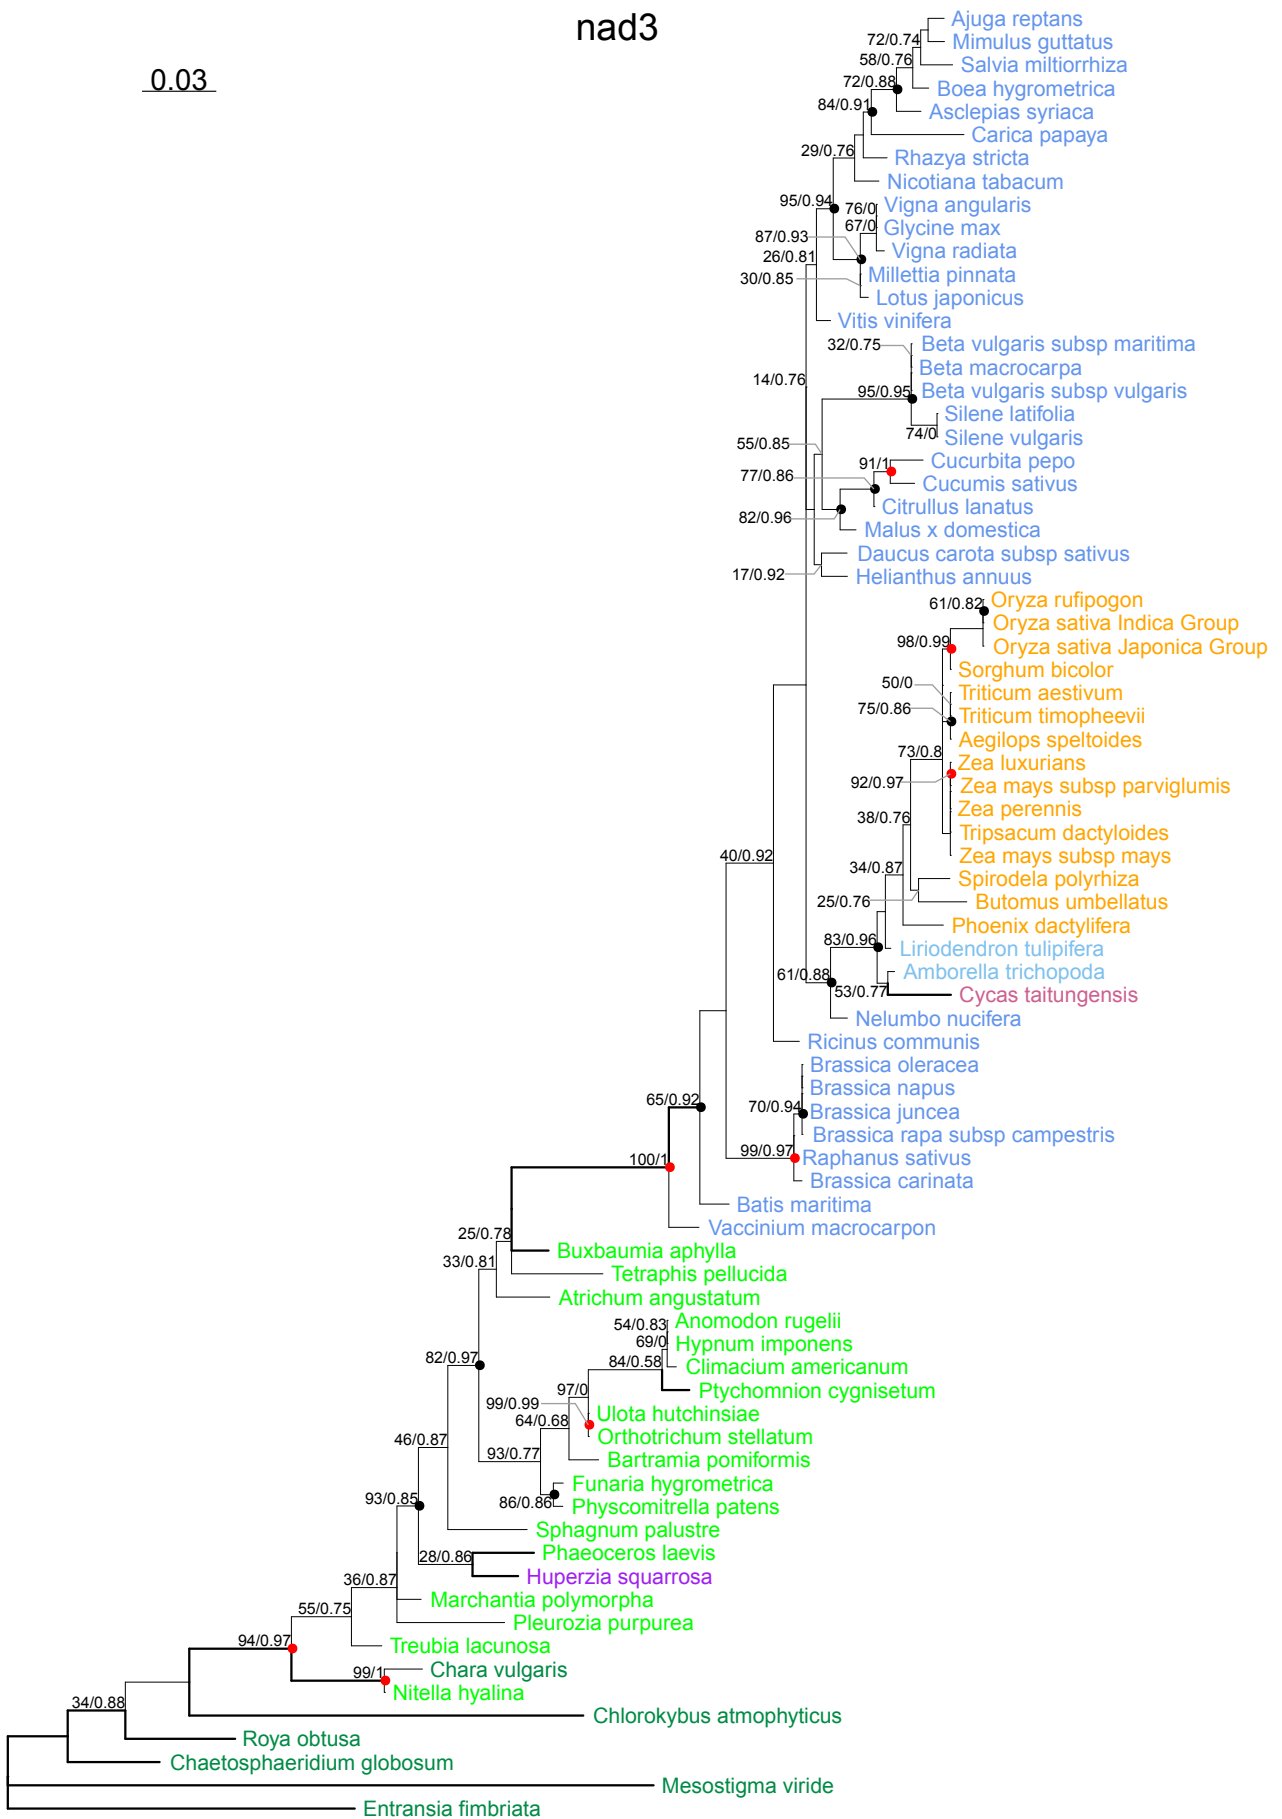



Figure S6 (continued)

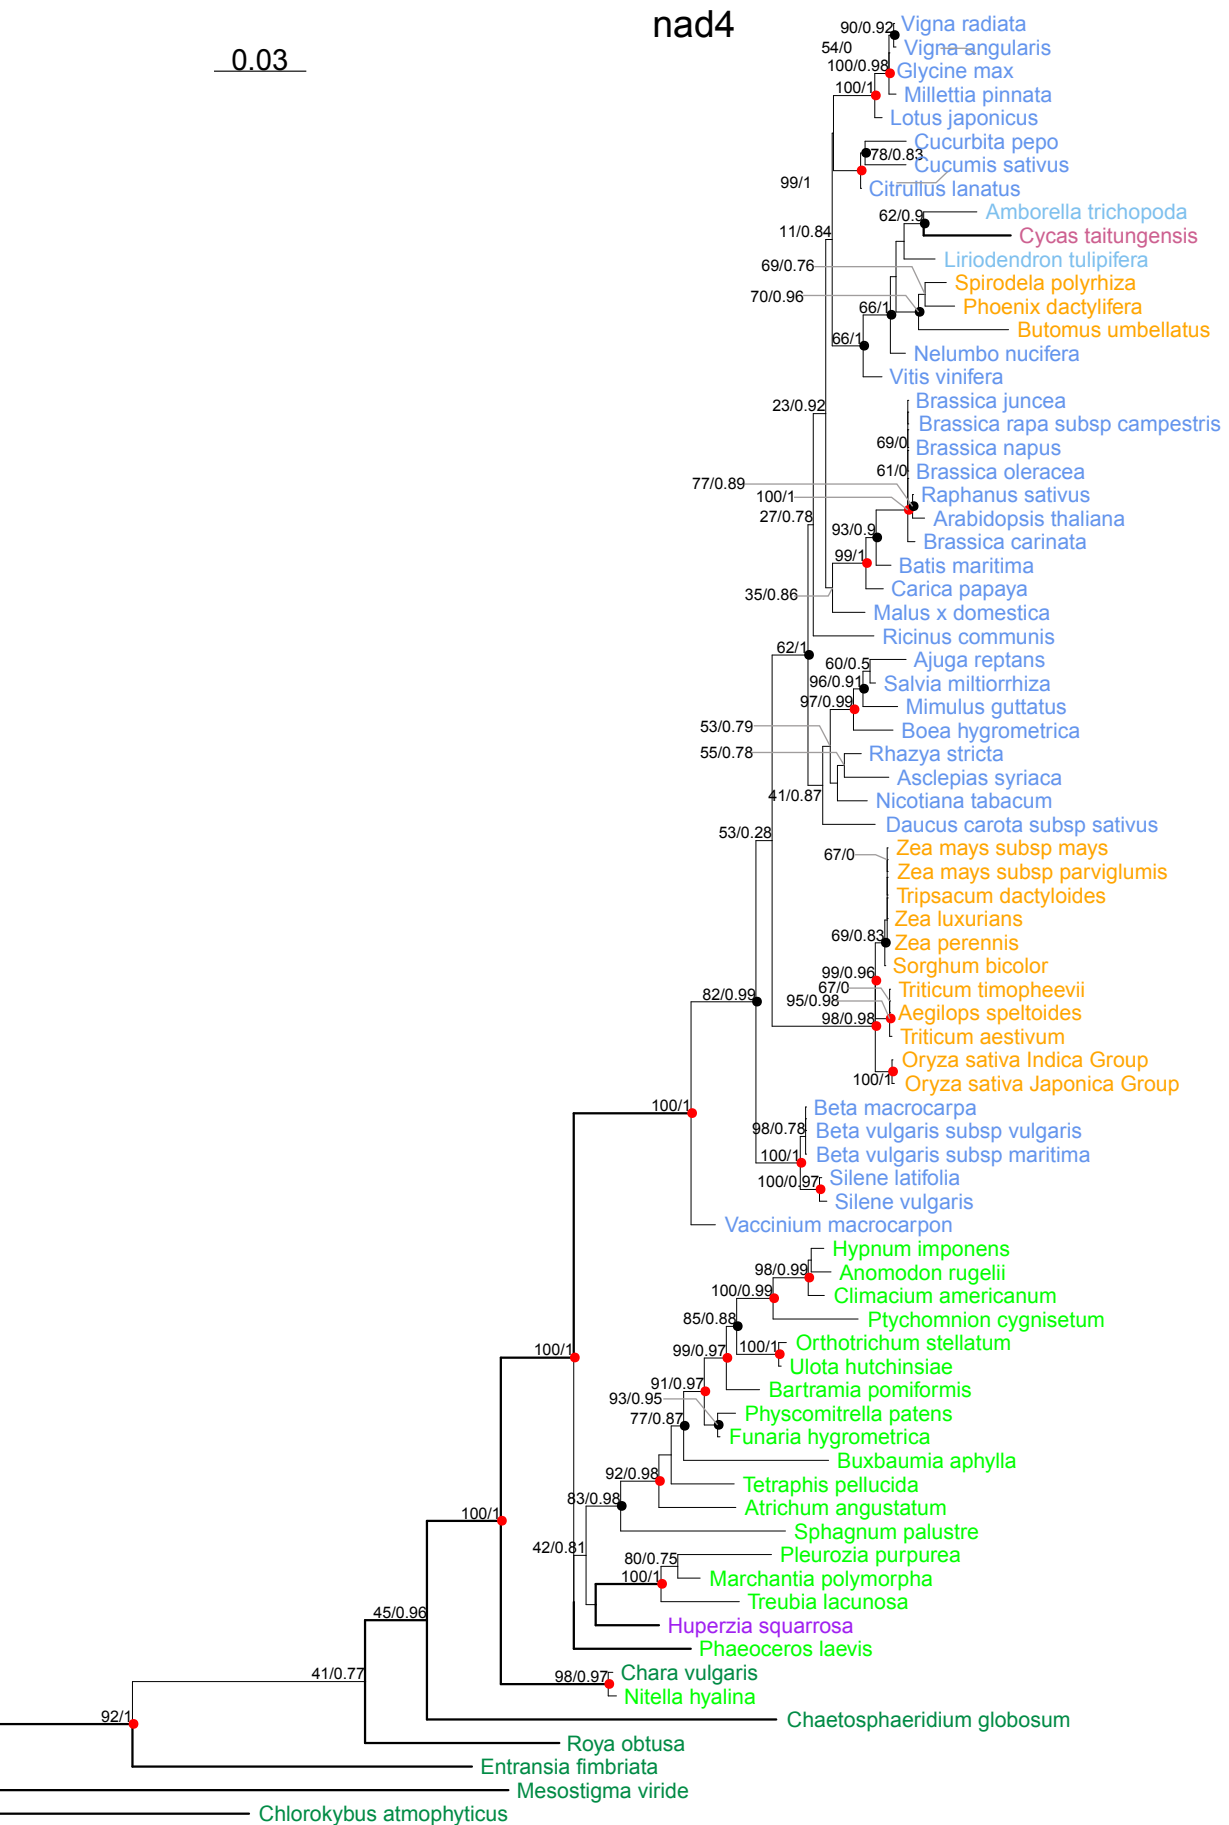

Figure S6 (continued)

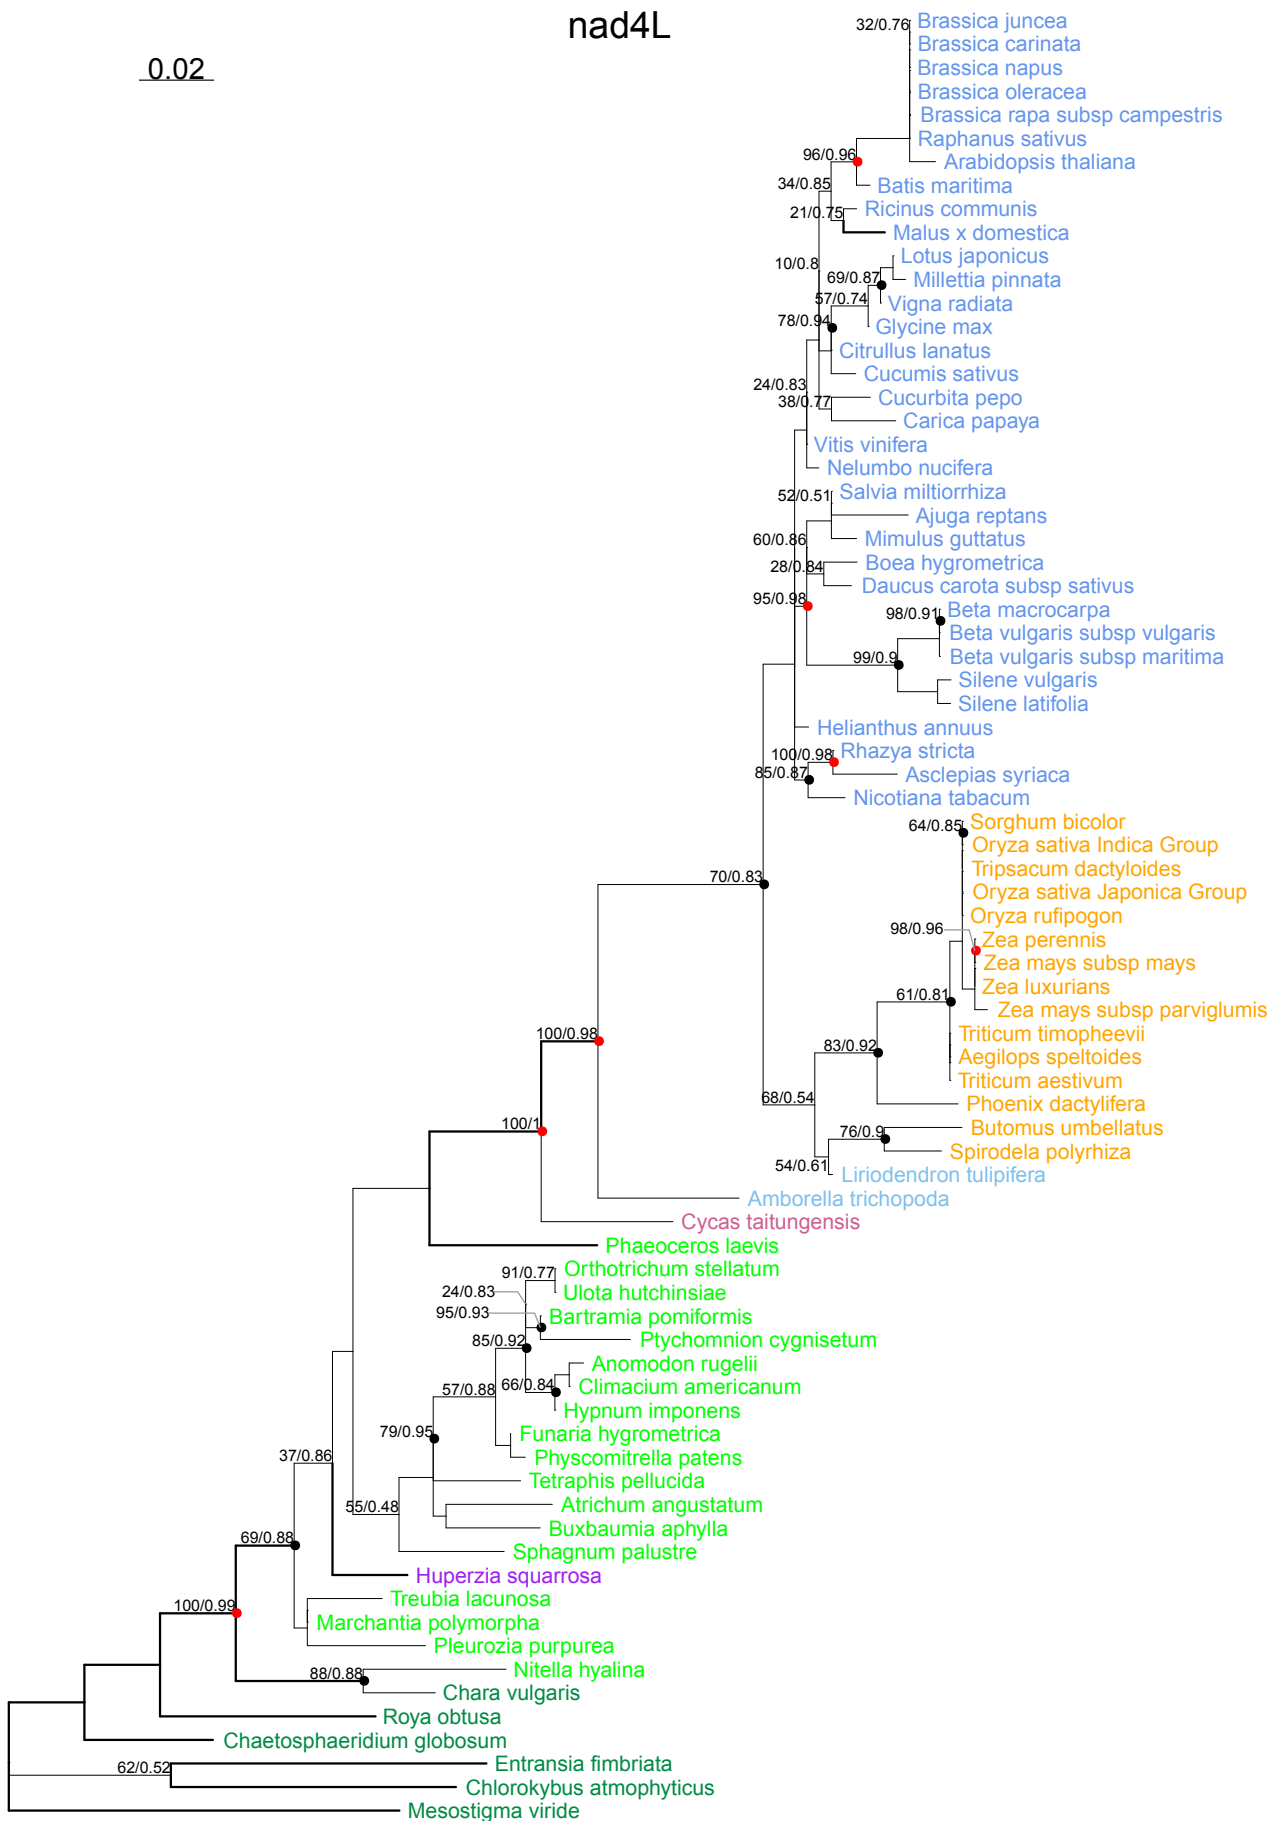

Figure S6 (continued)

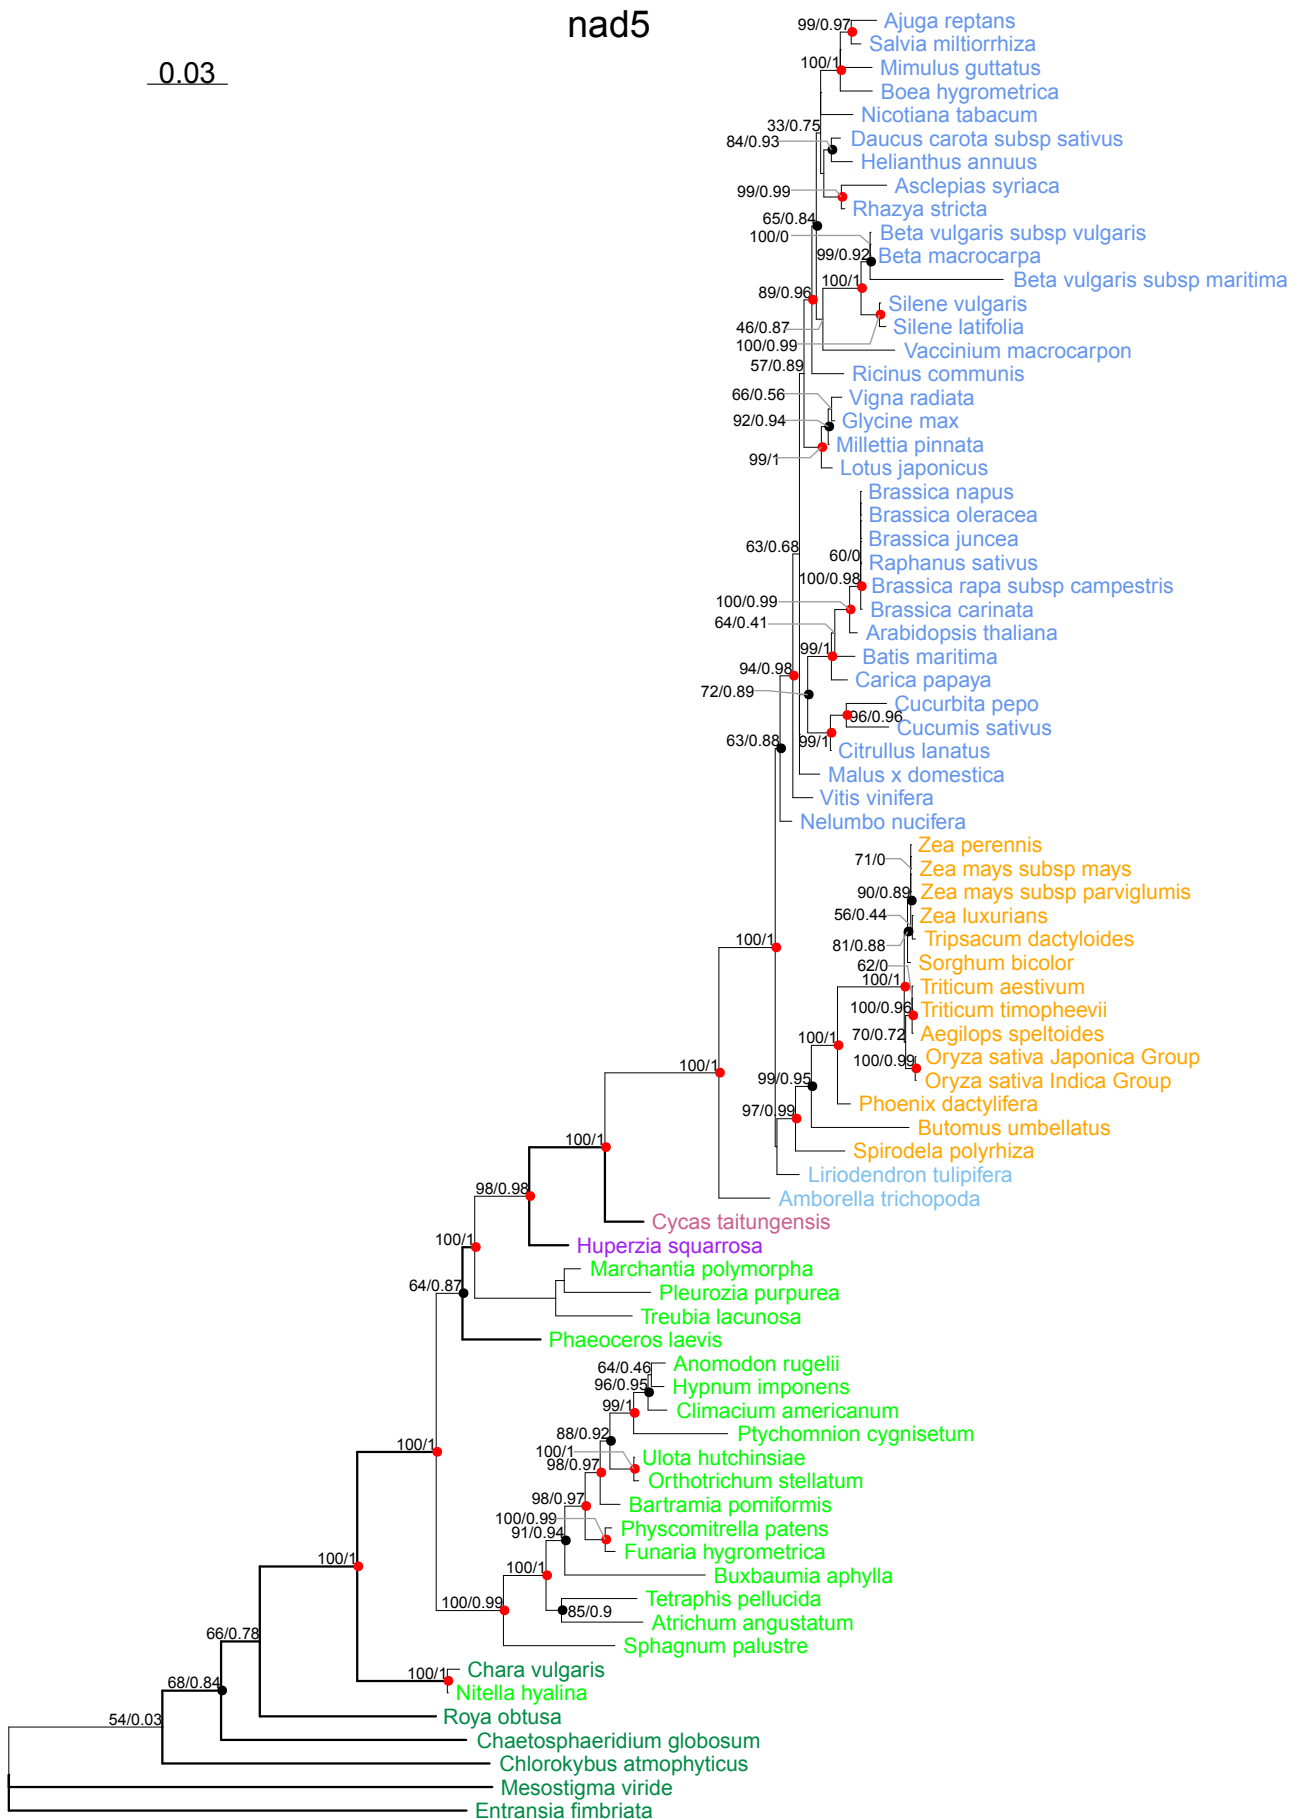

Figure S6 (continued)

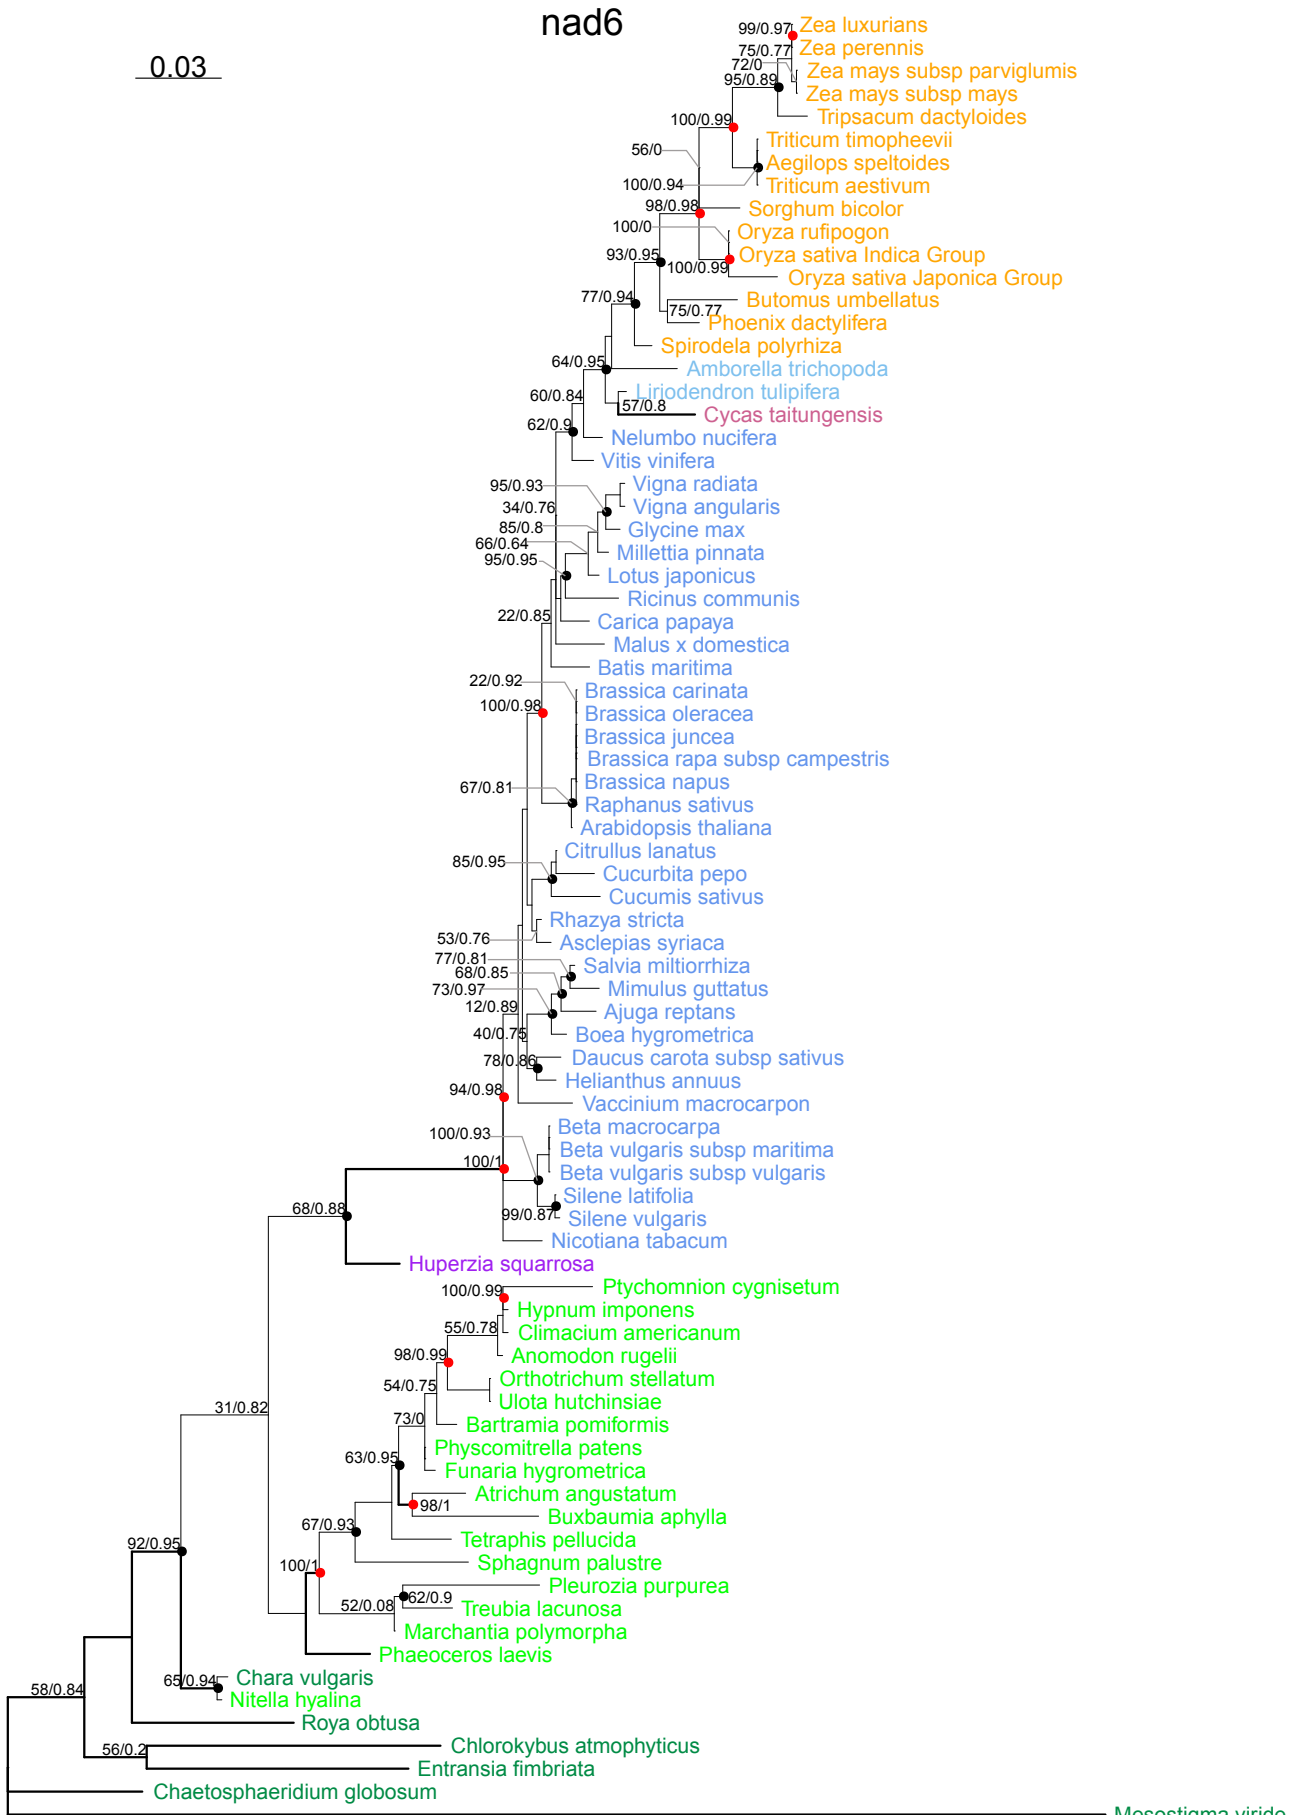

Figure S6 (continued)

nad7

0.02

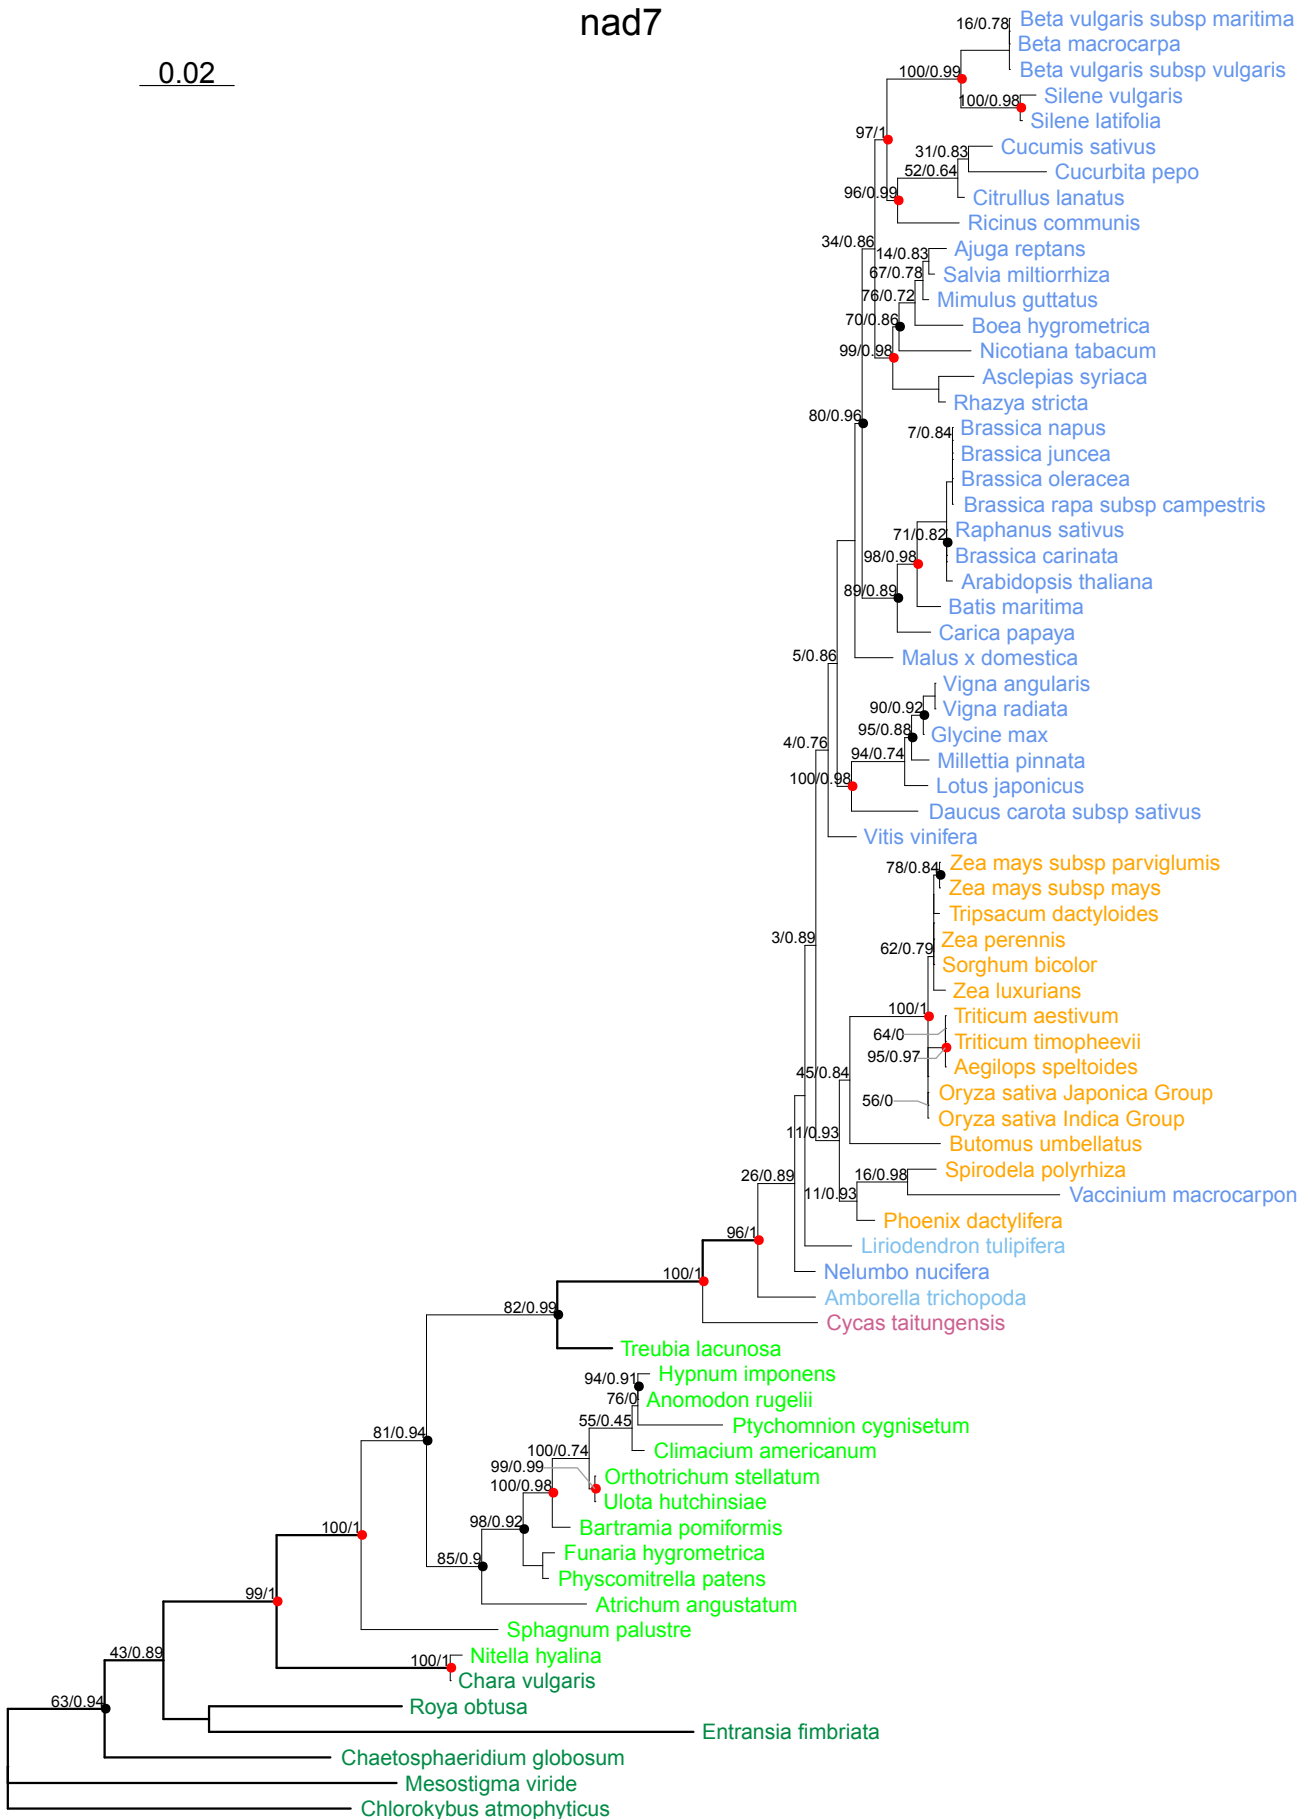

Figure S6 (continued)

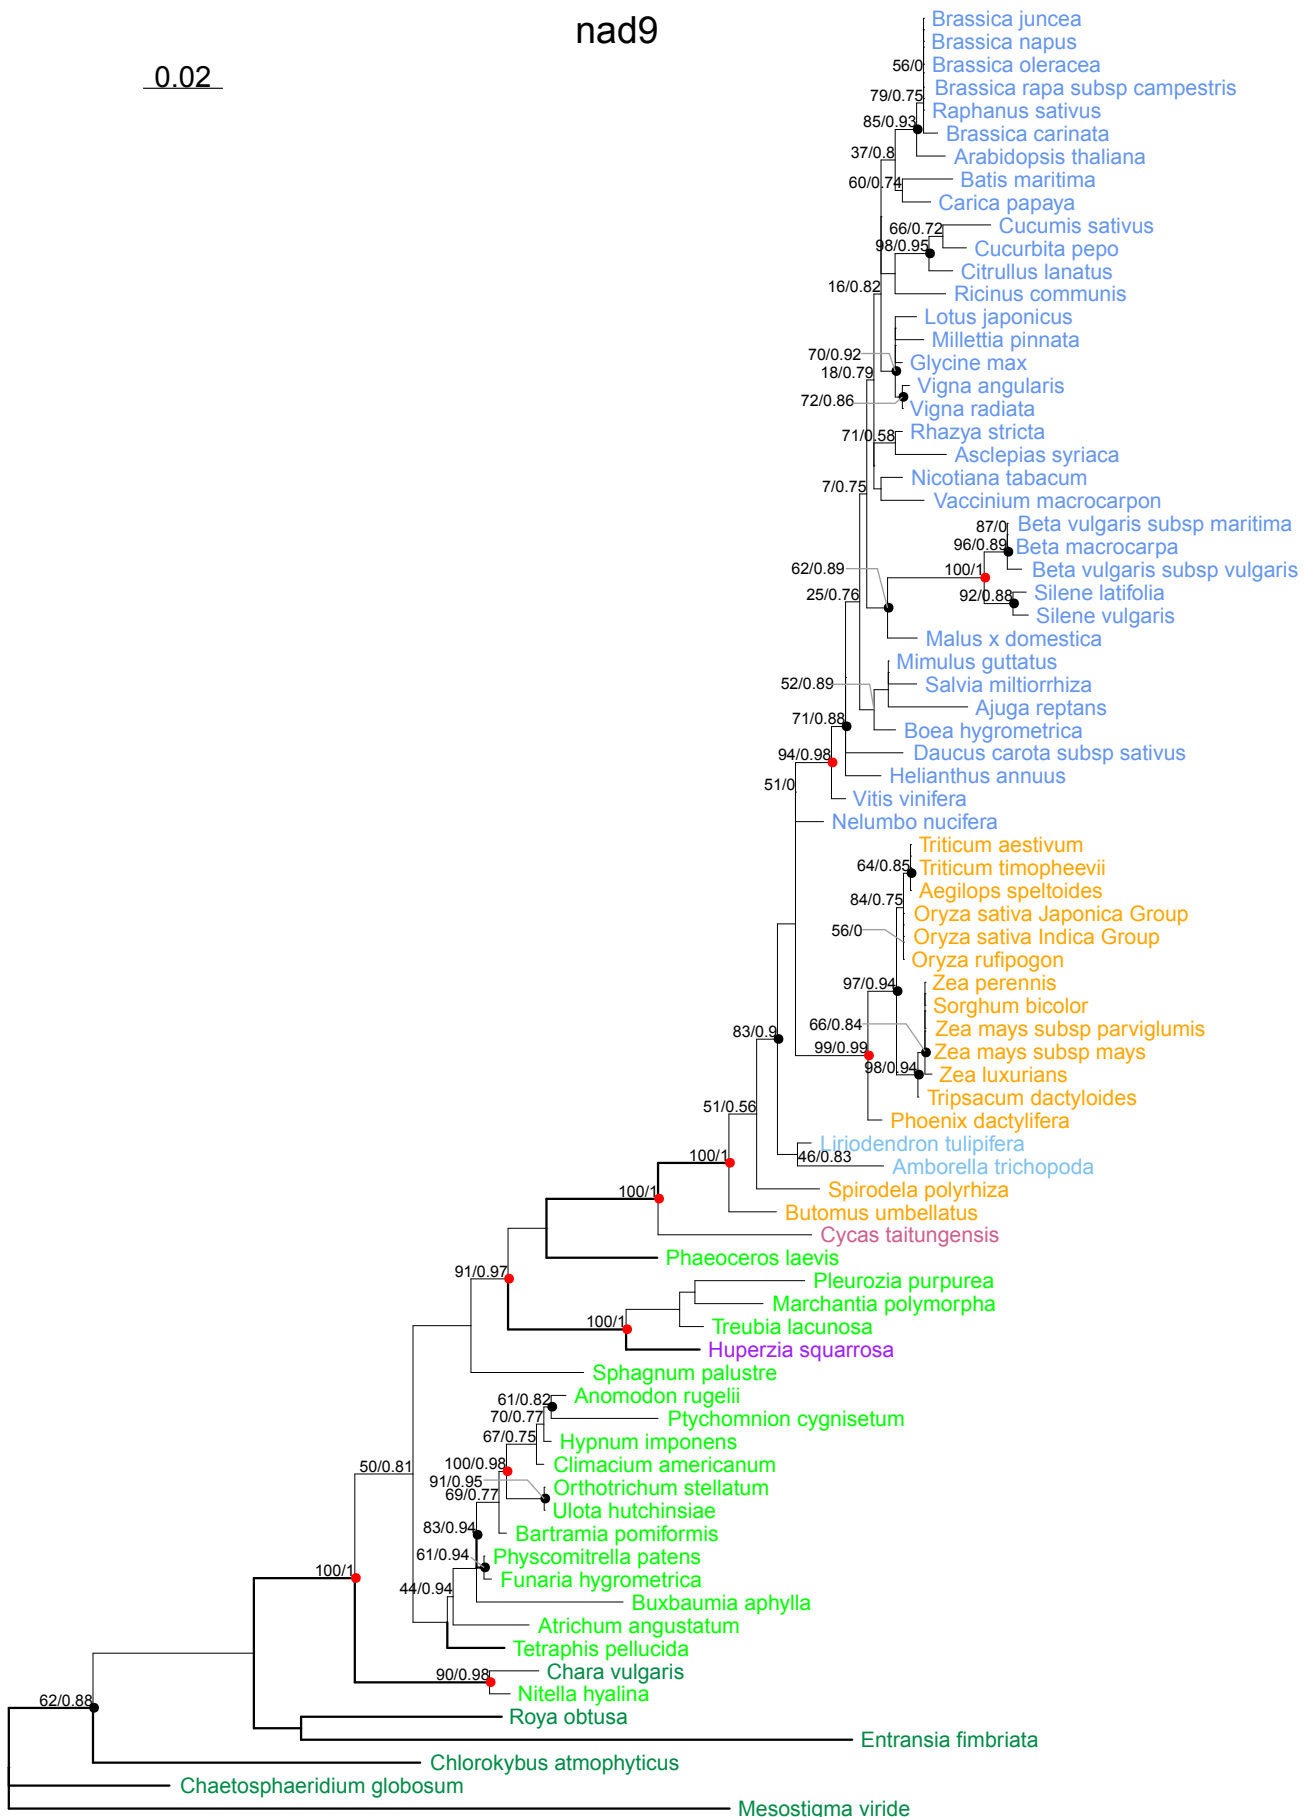

Figure S6 (continued)

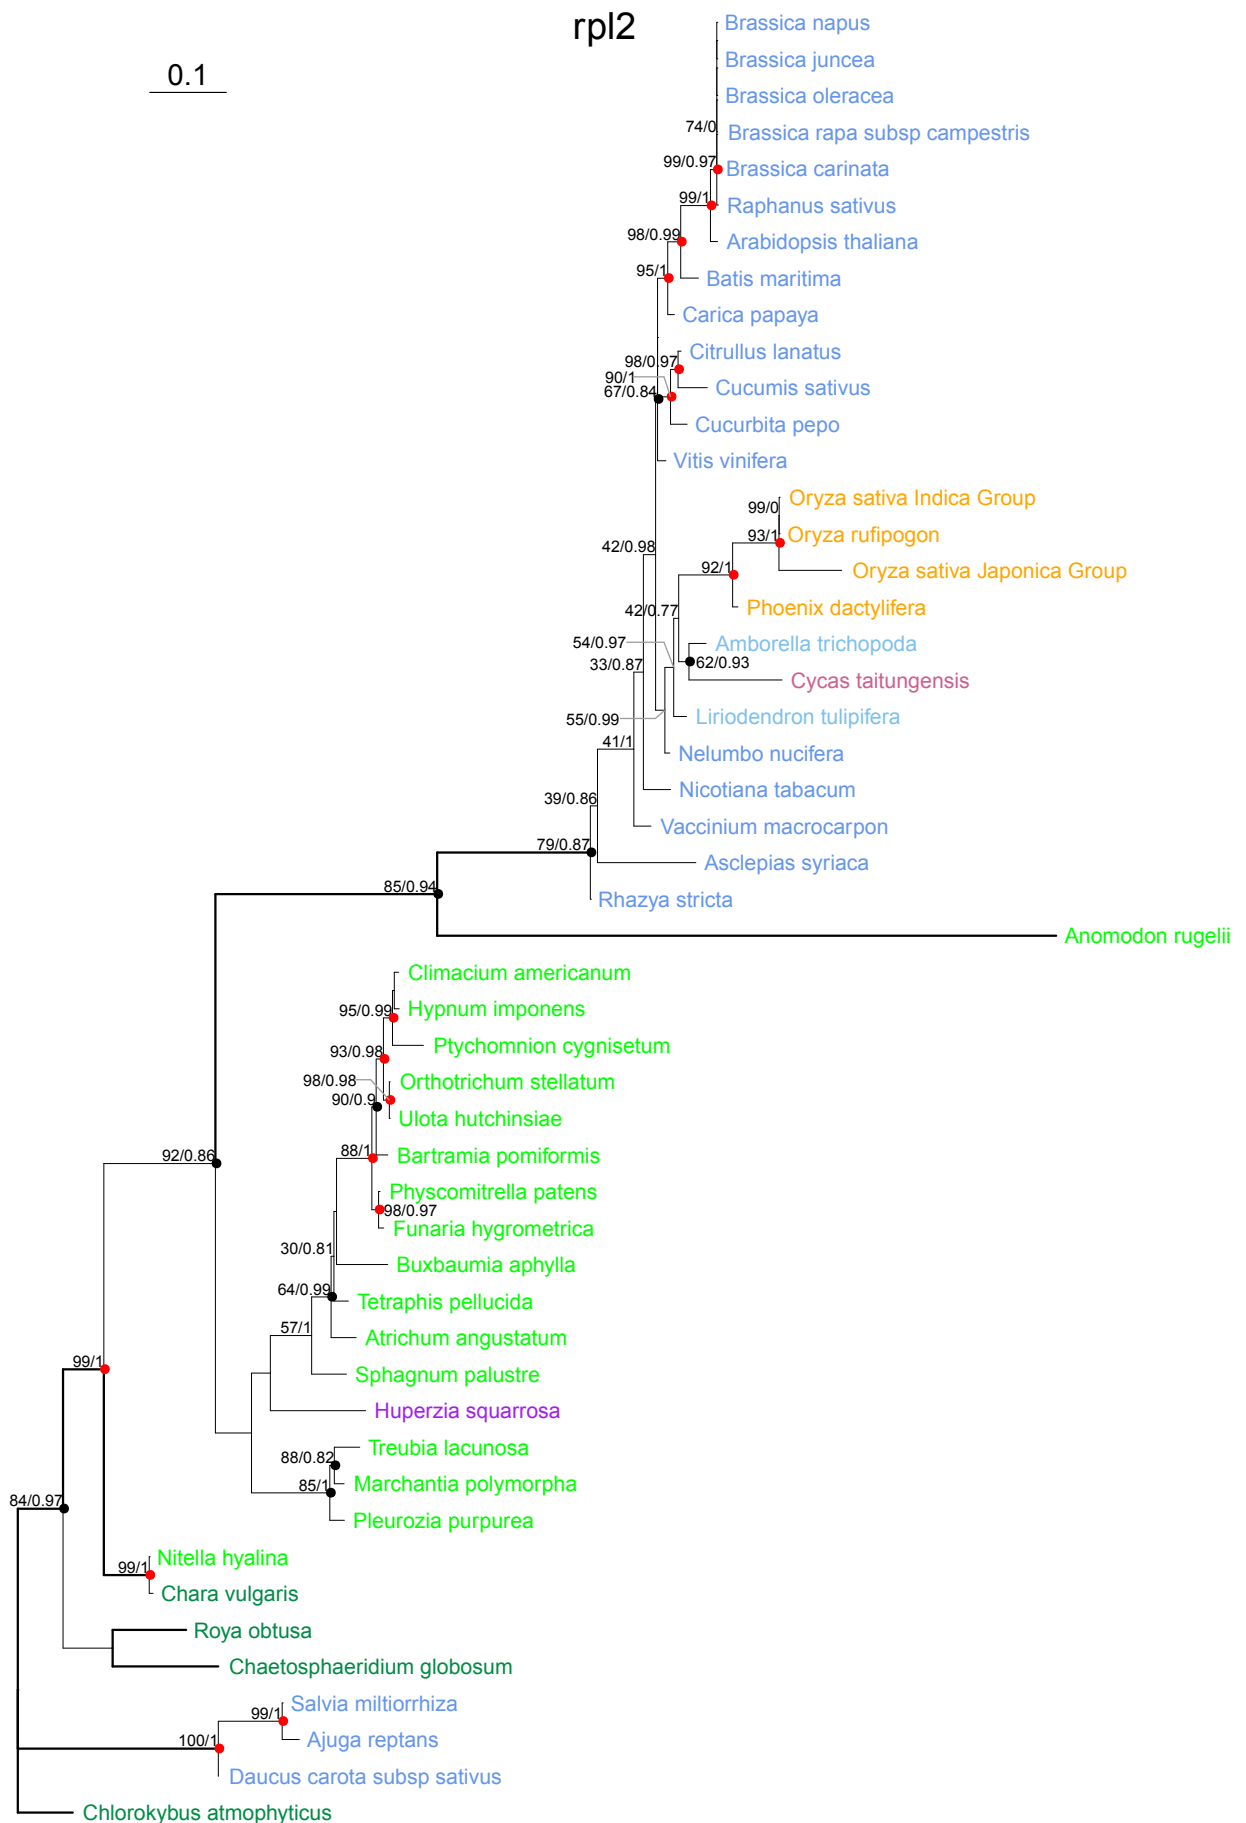

Figure S6 (continued)

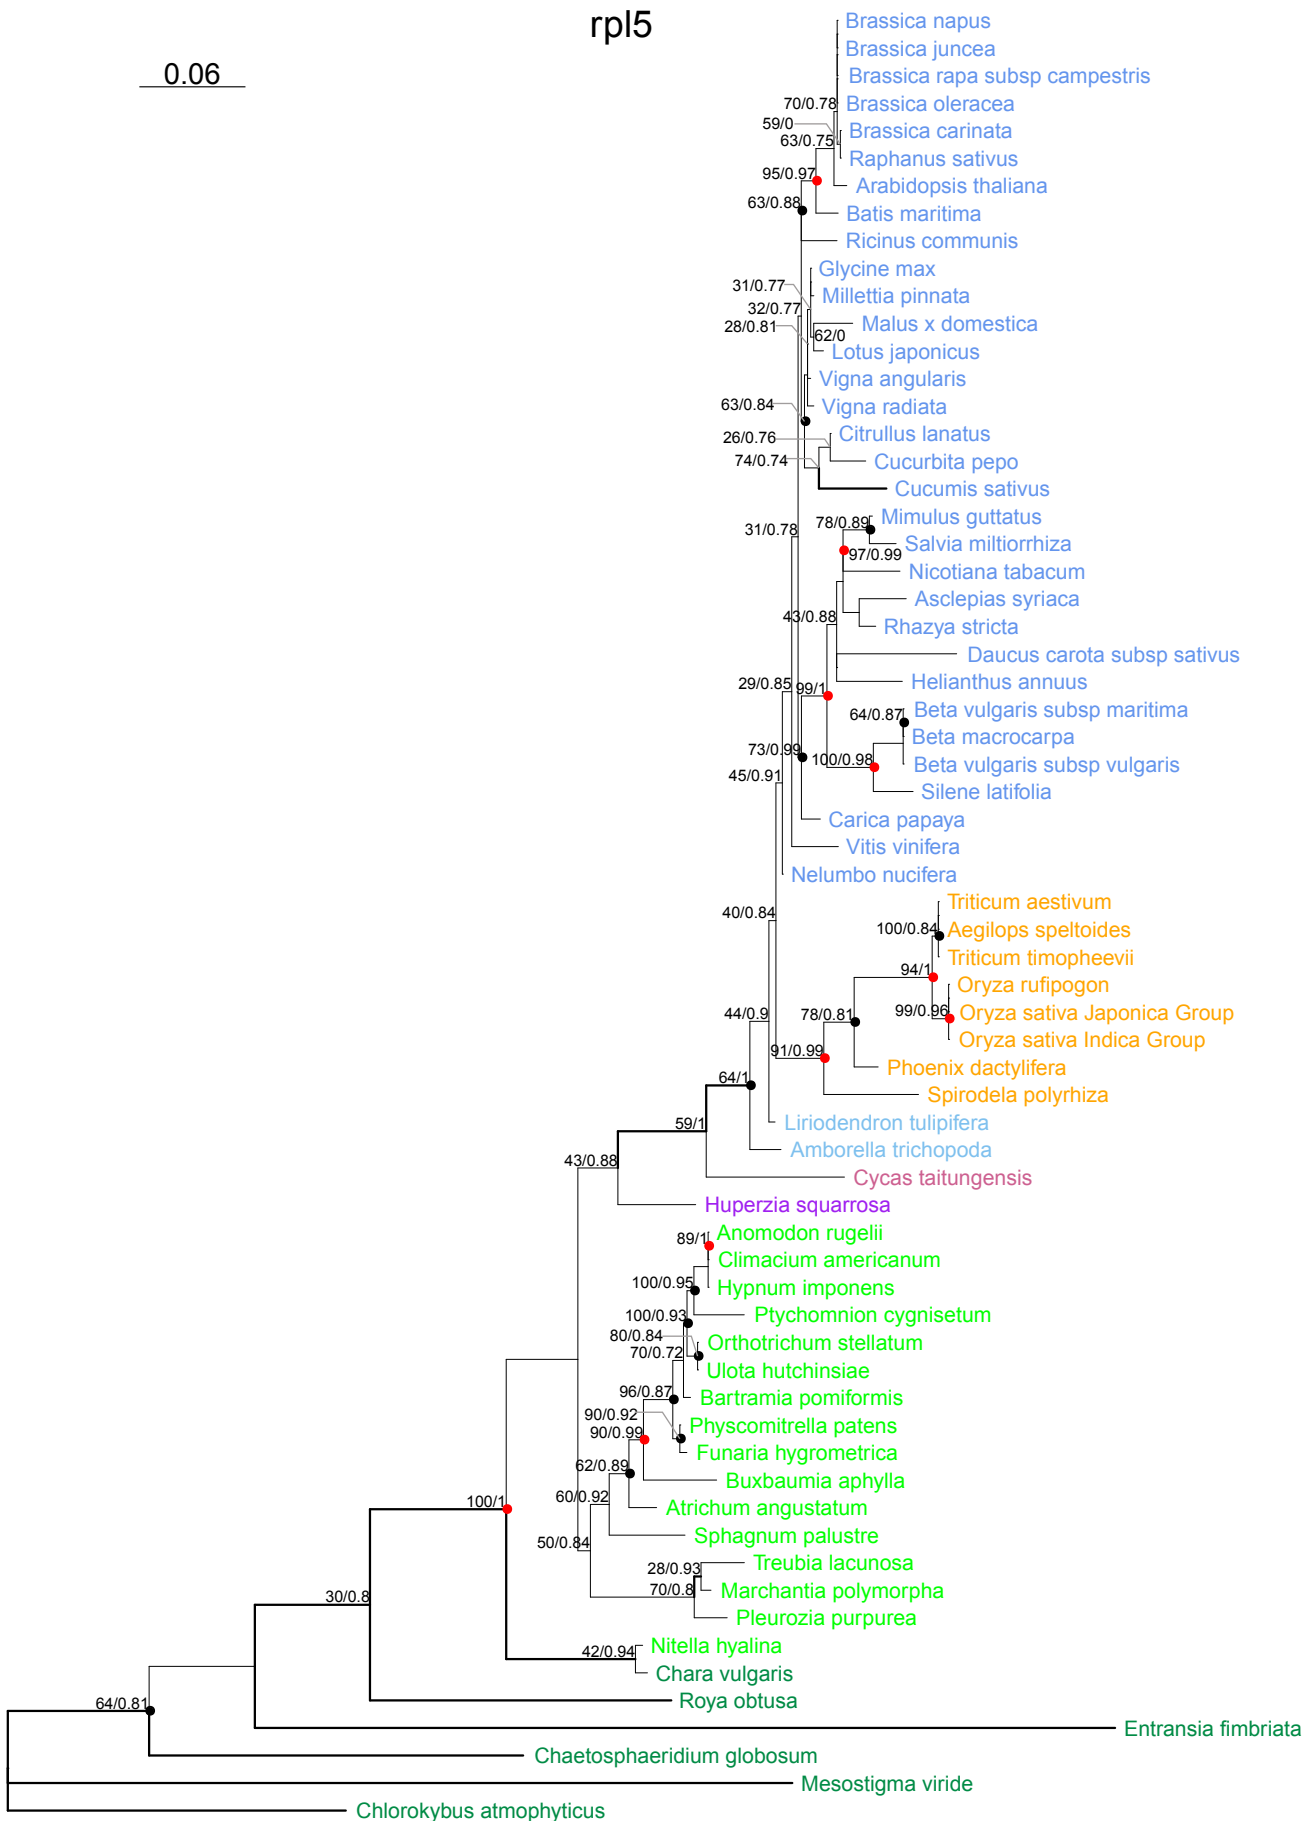



Figure S6 (continued)

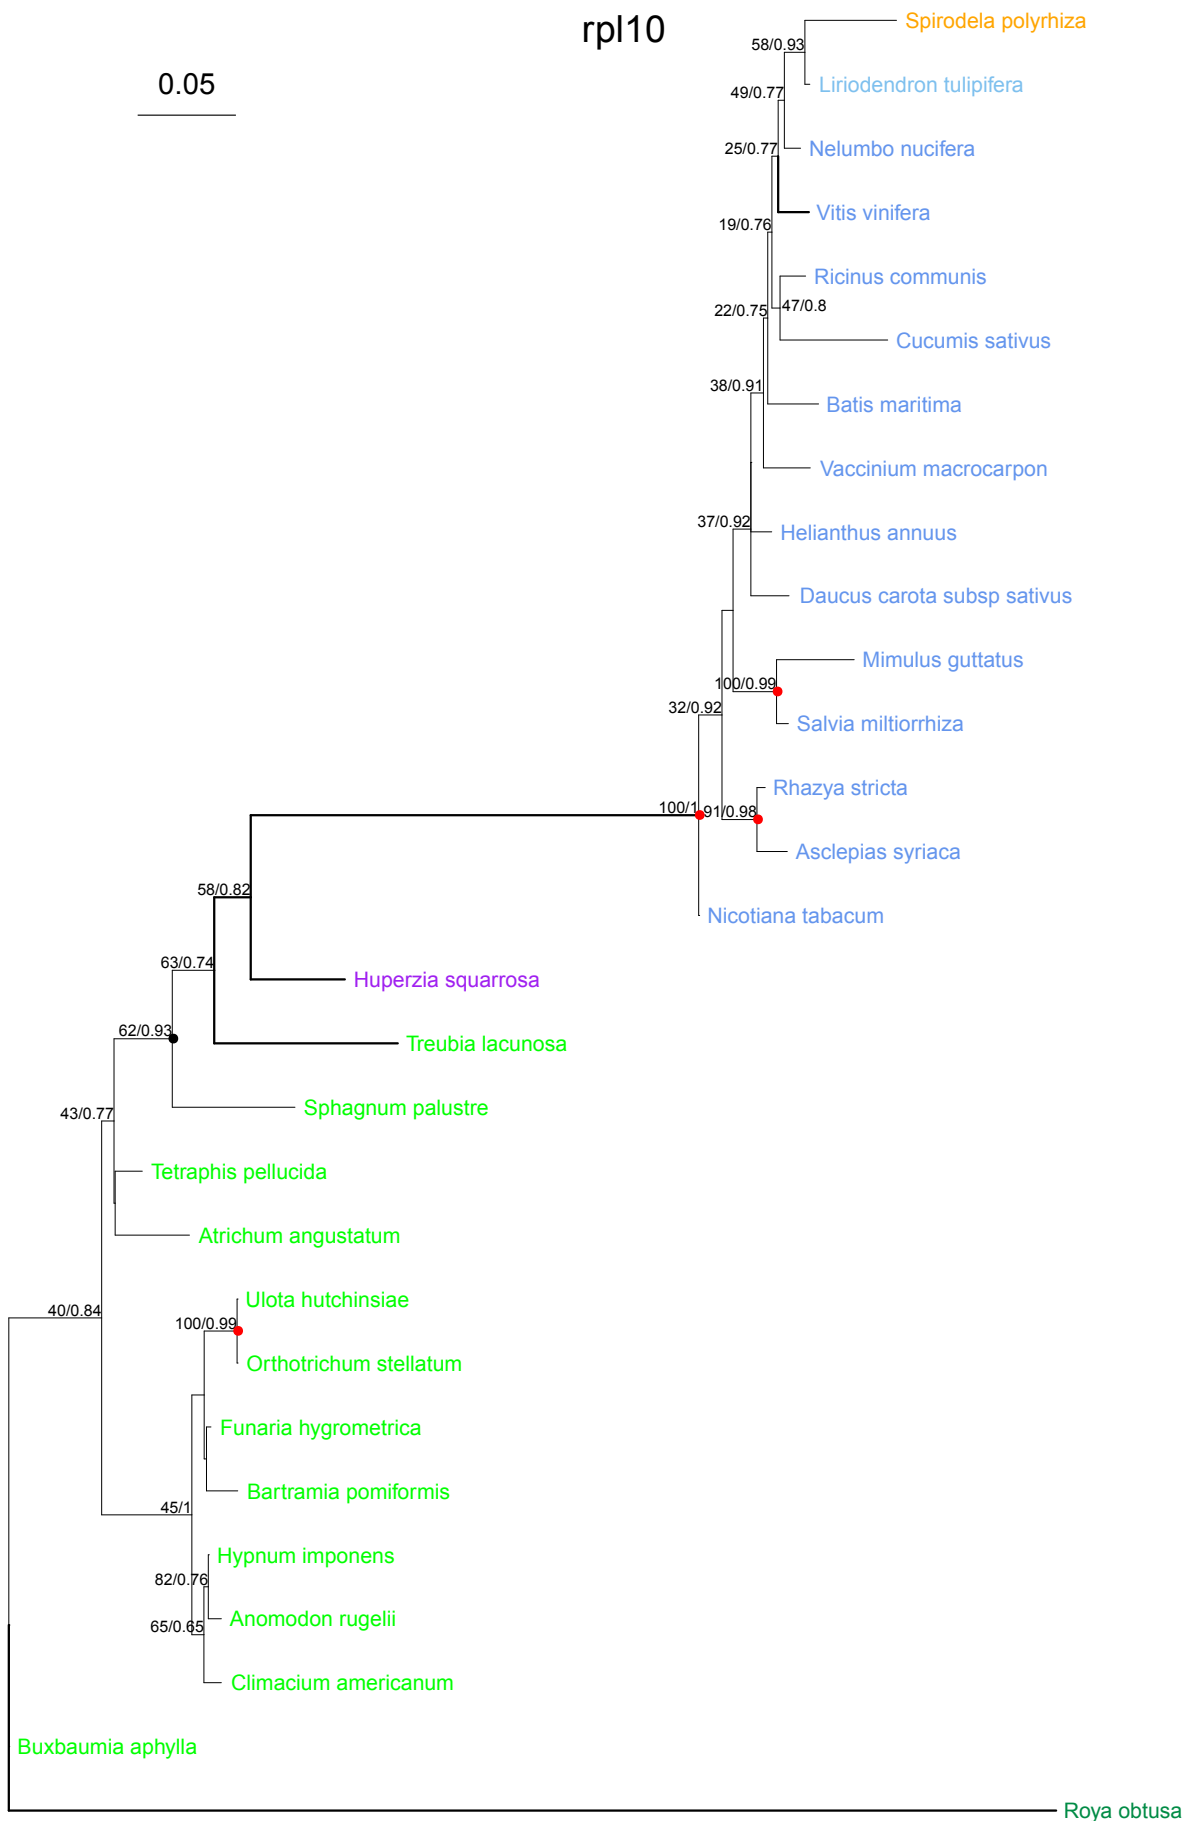

Figure S6 (continued)

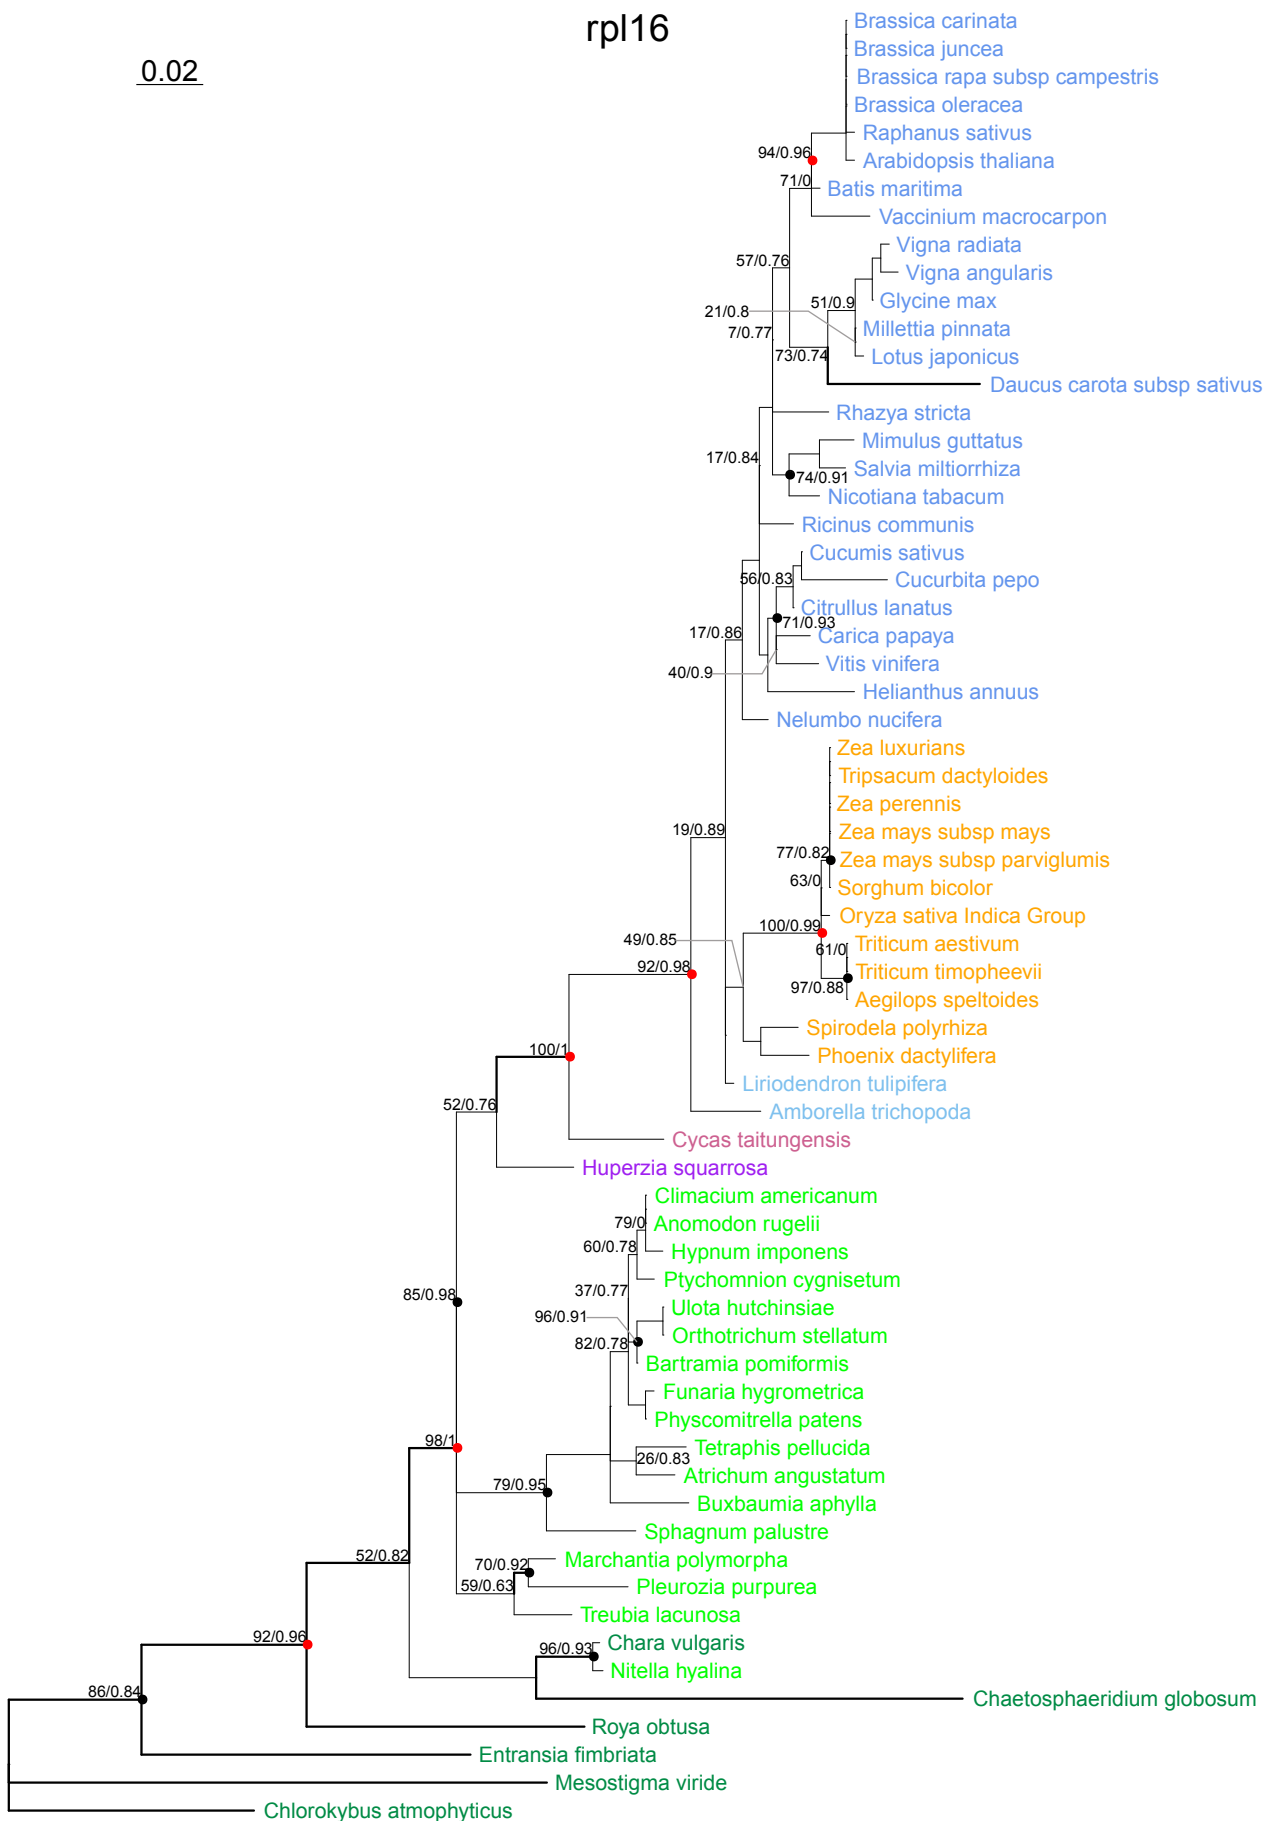

Figure S6 (continued)

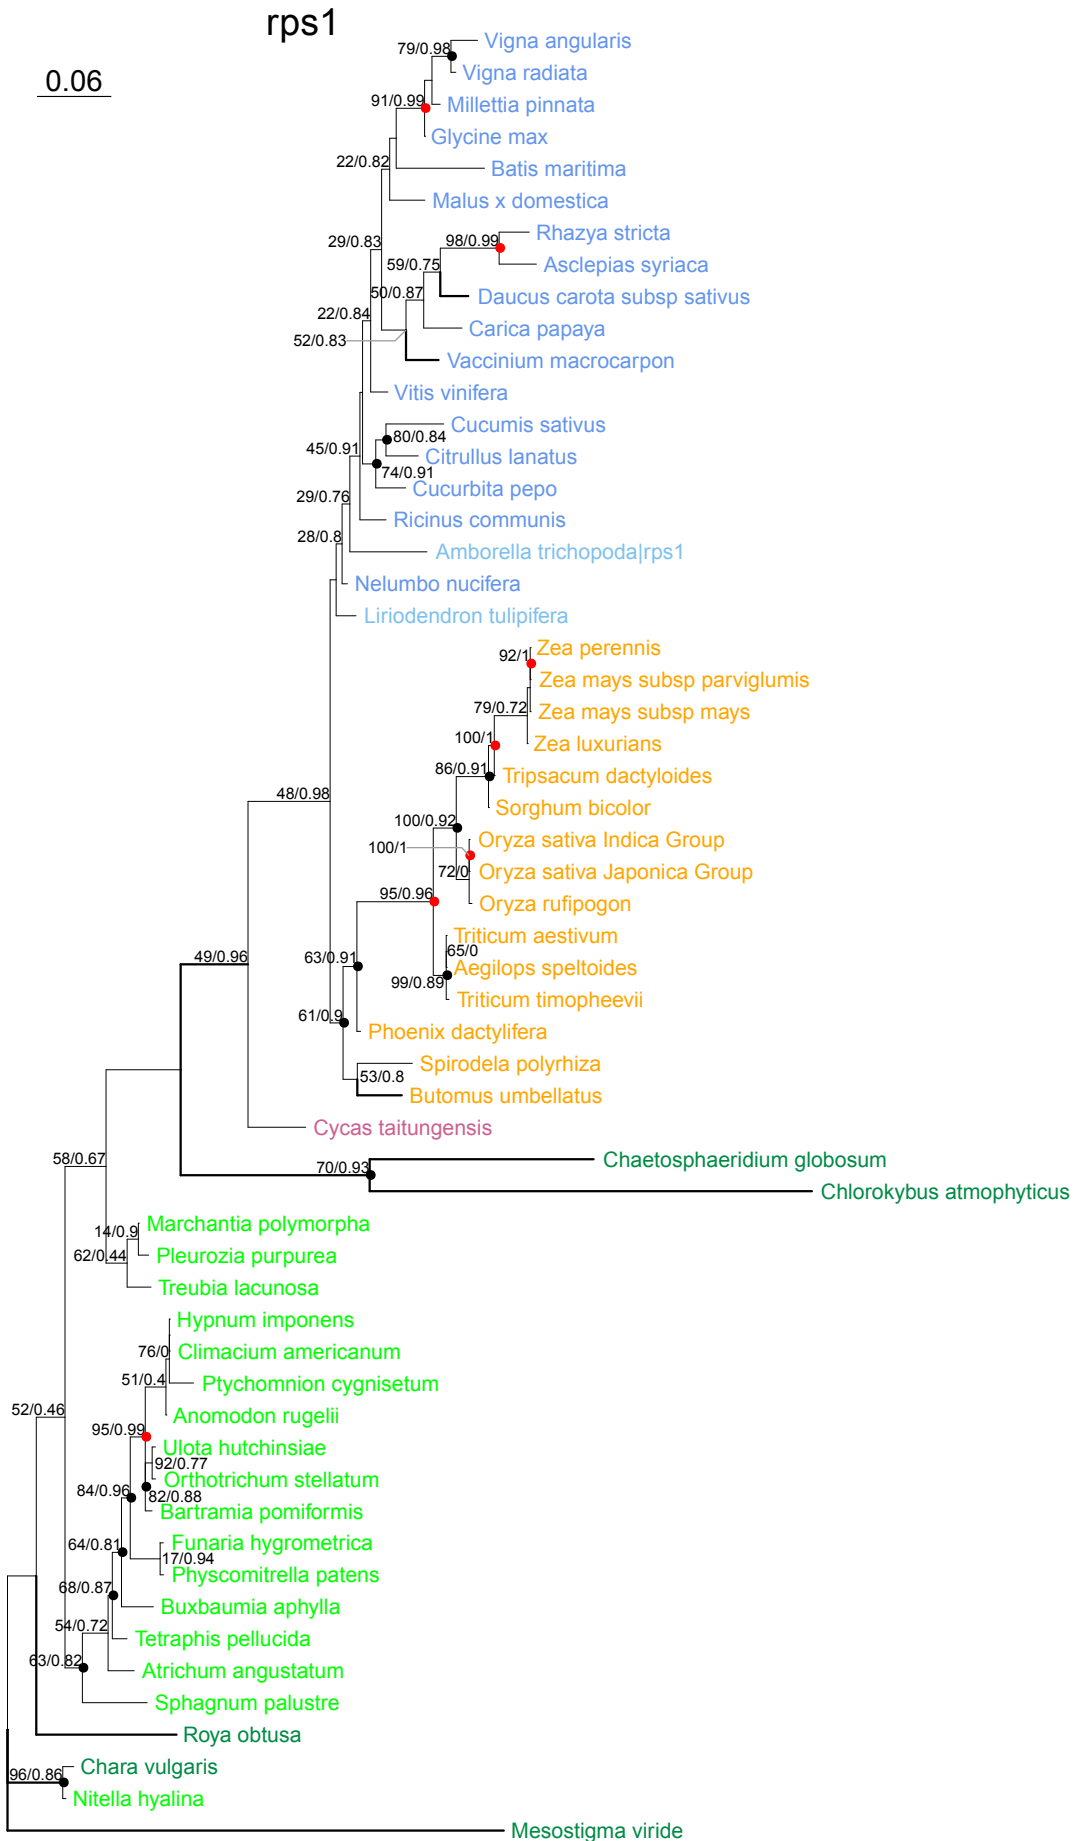

Figure S6 (continued)

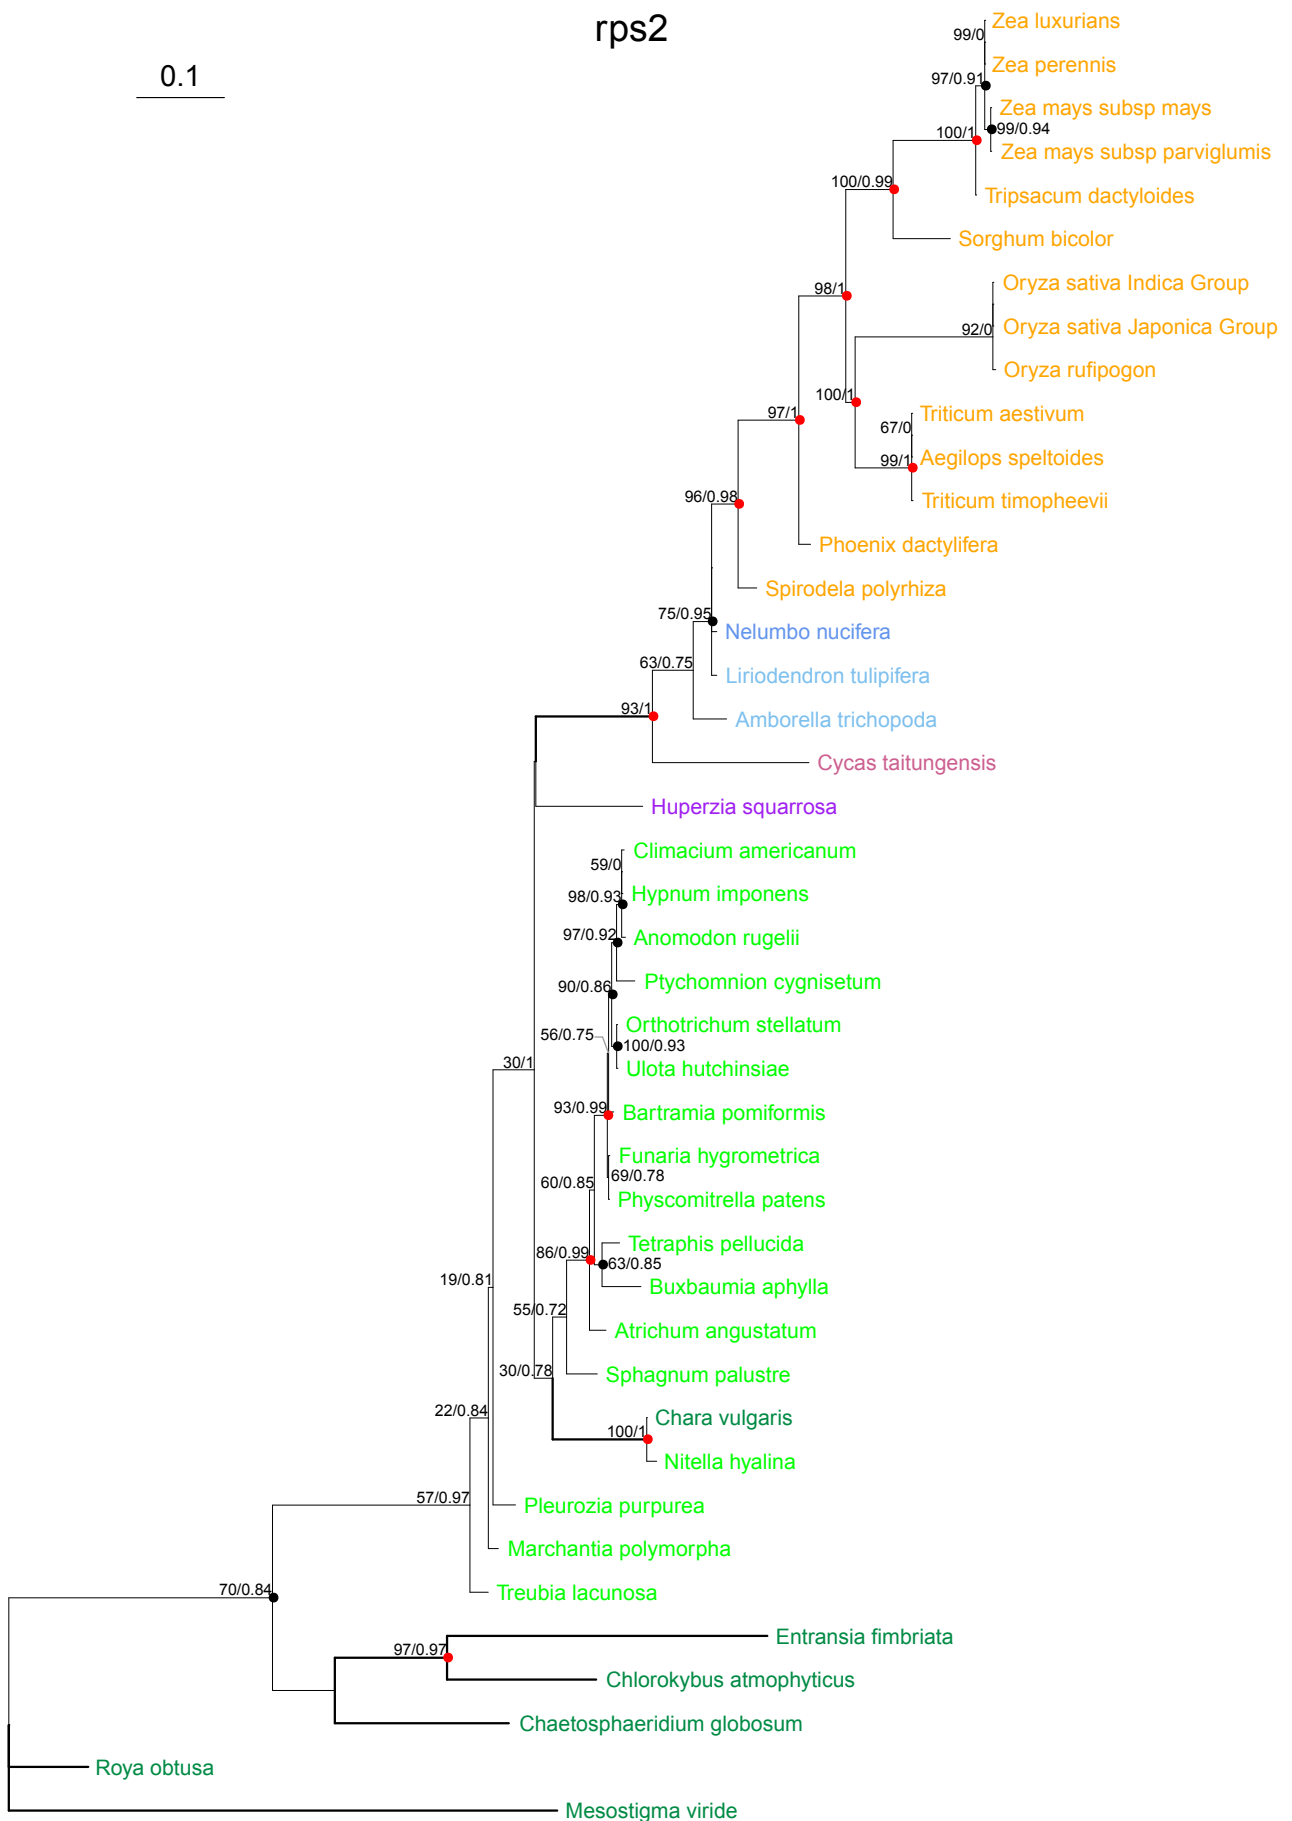

Figure S6 (continued)

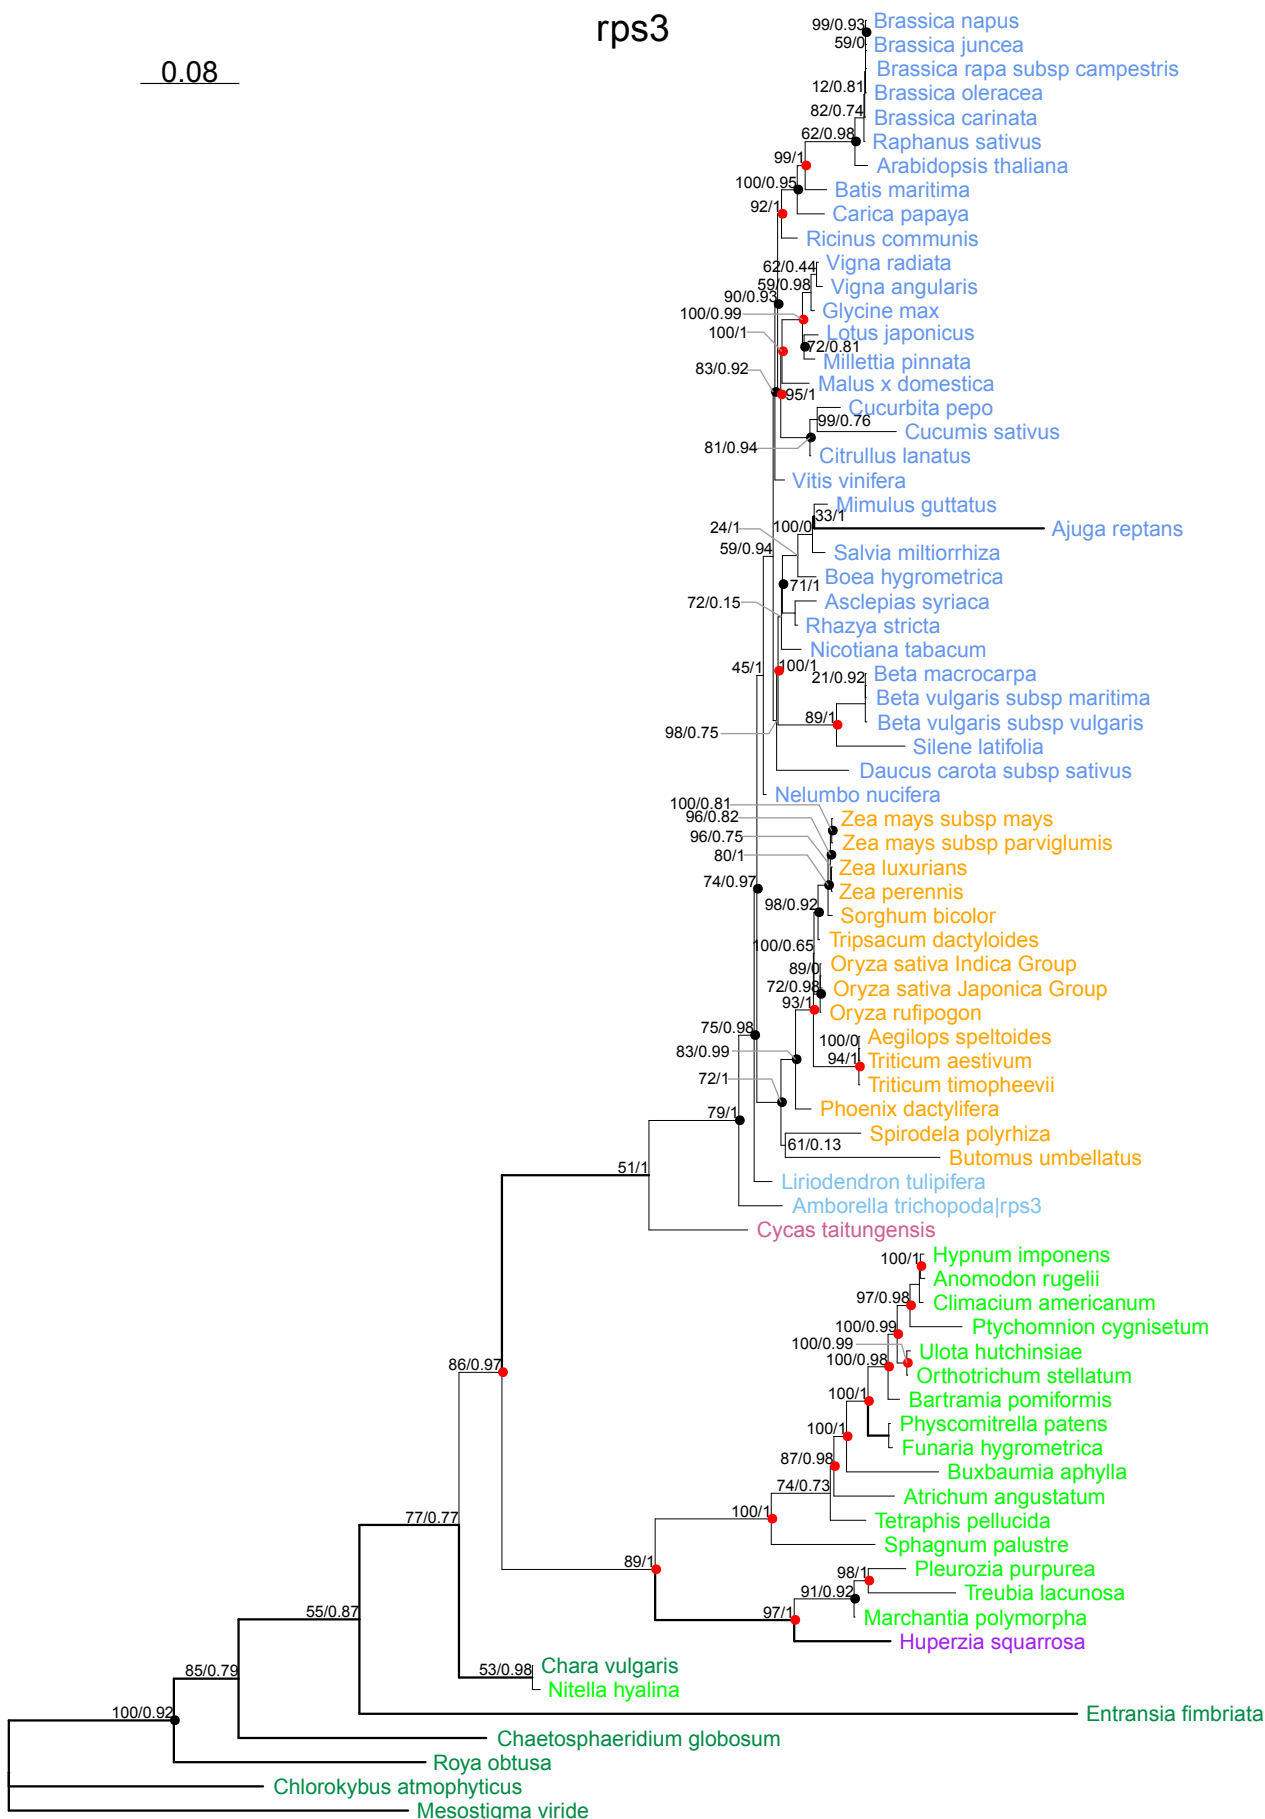

Figure S6 (continued)

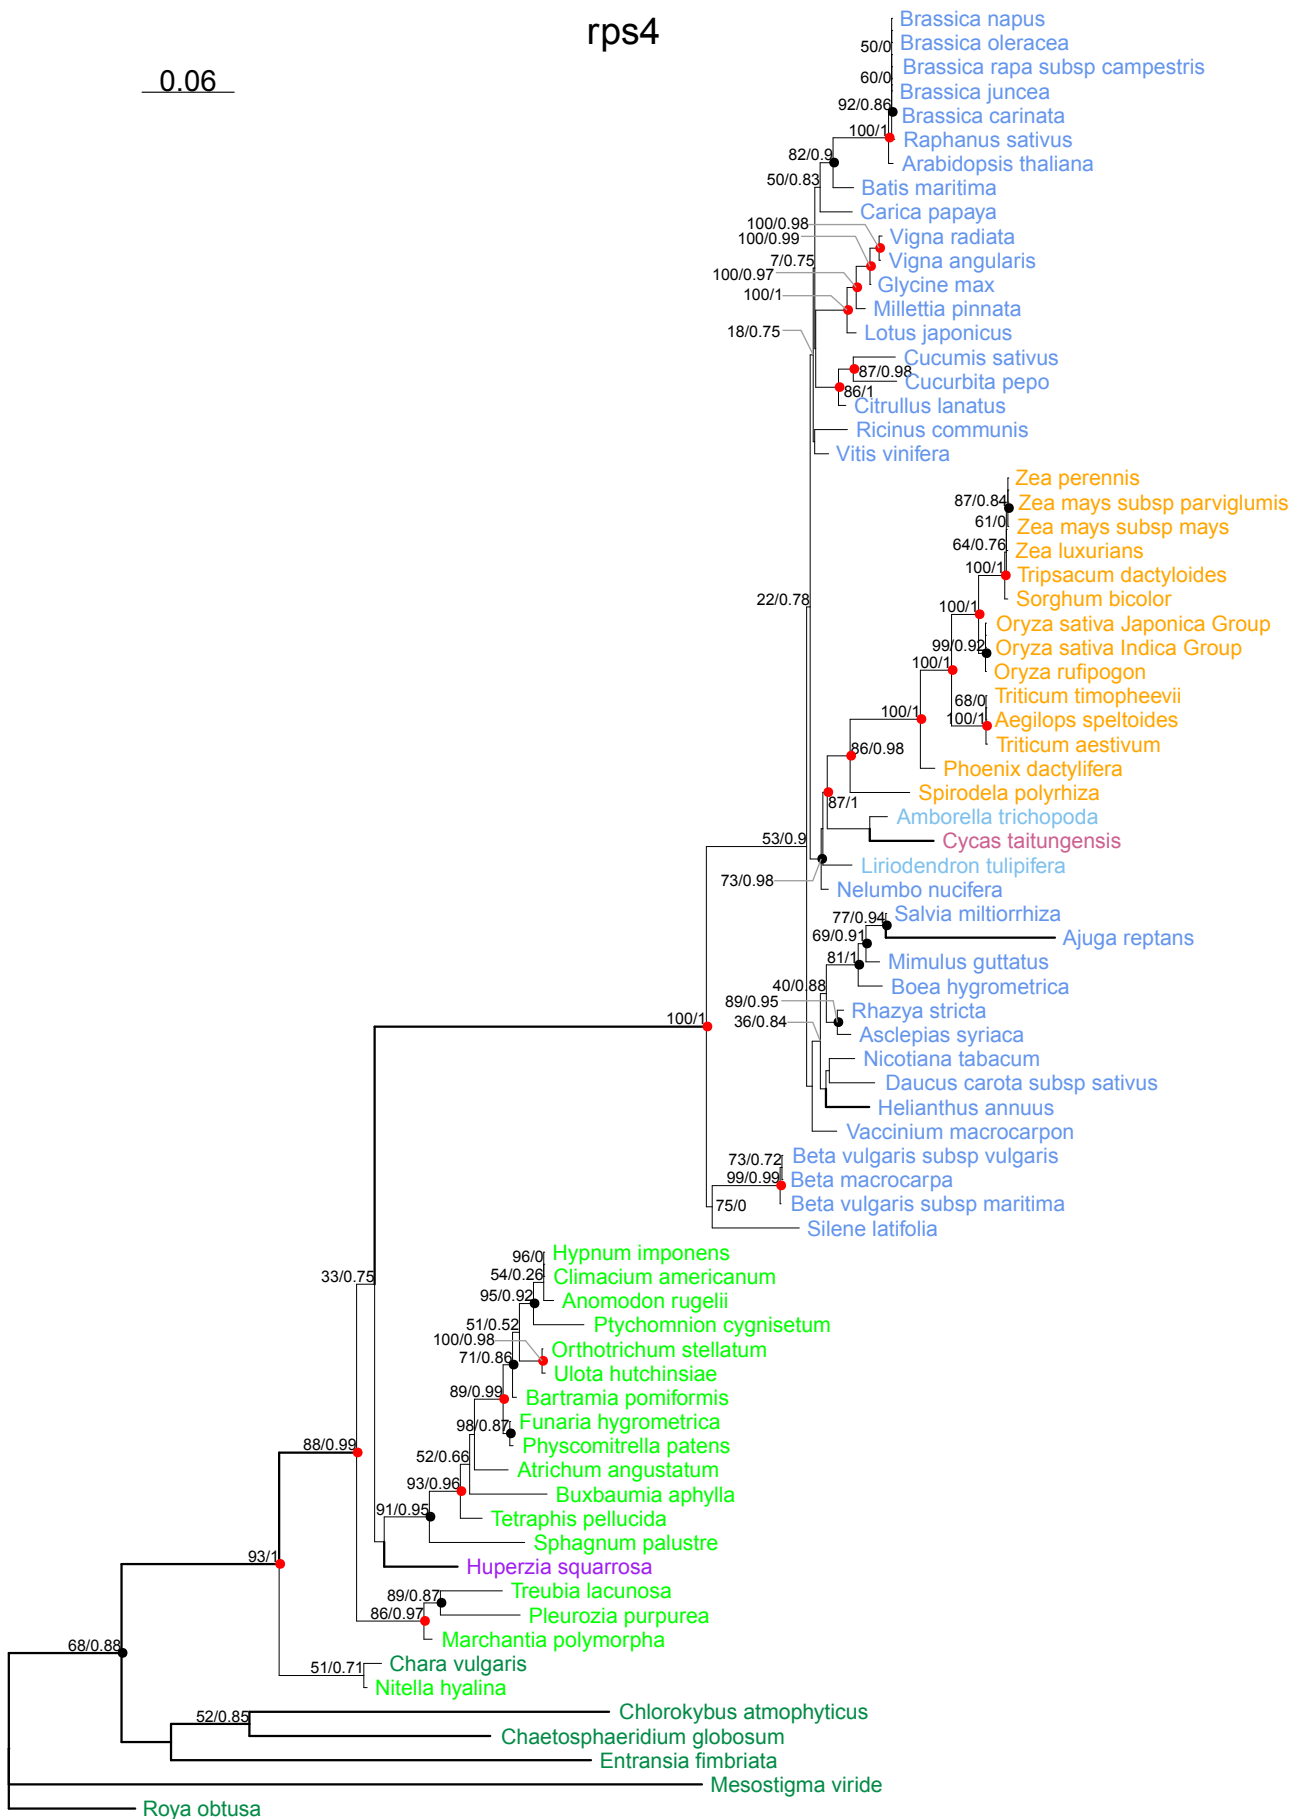

Figure S6 (continued)

rps7

0.04

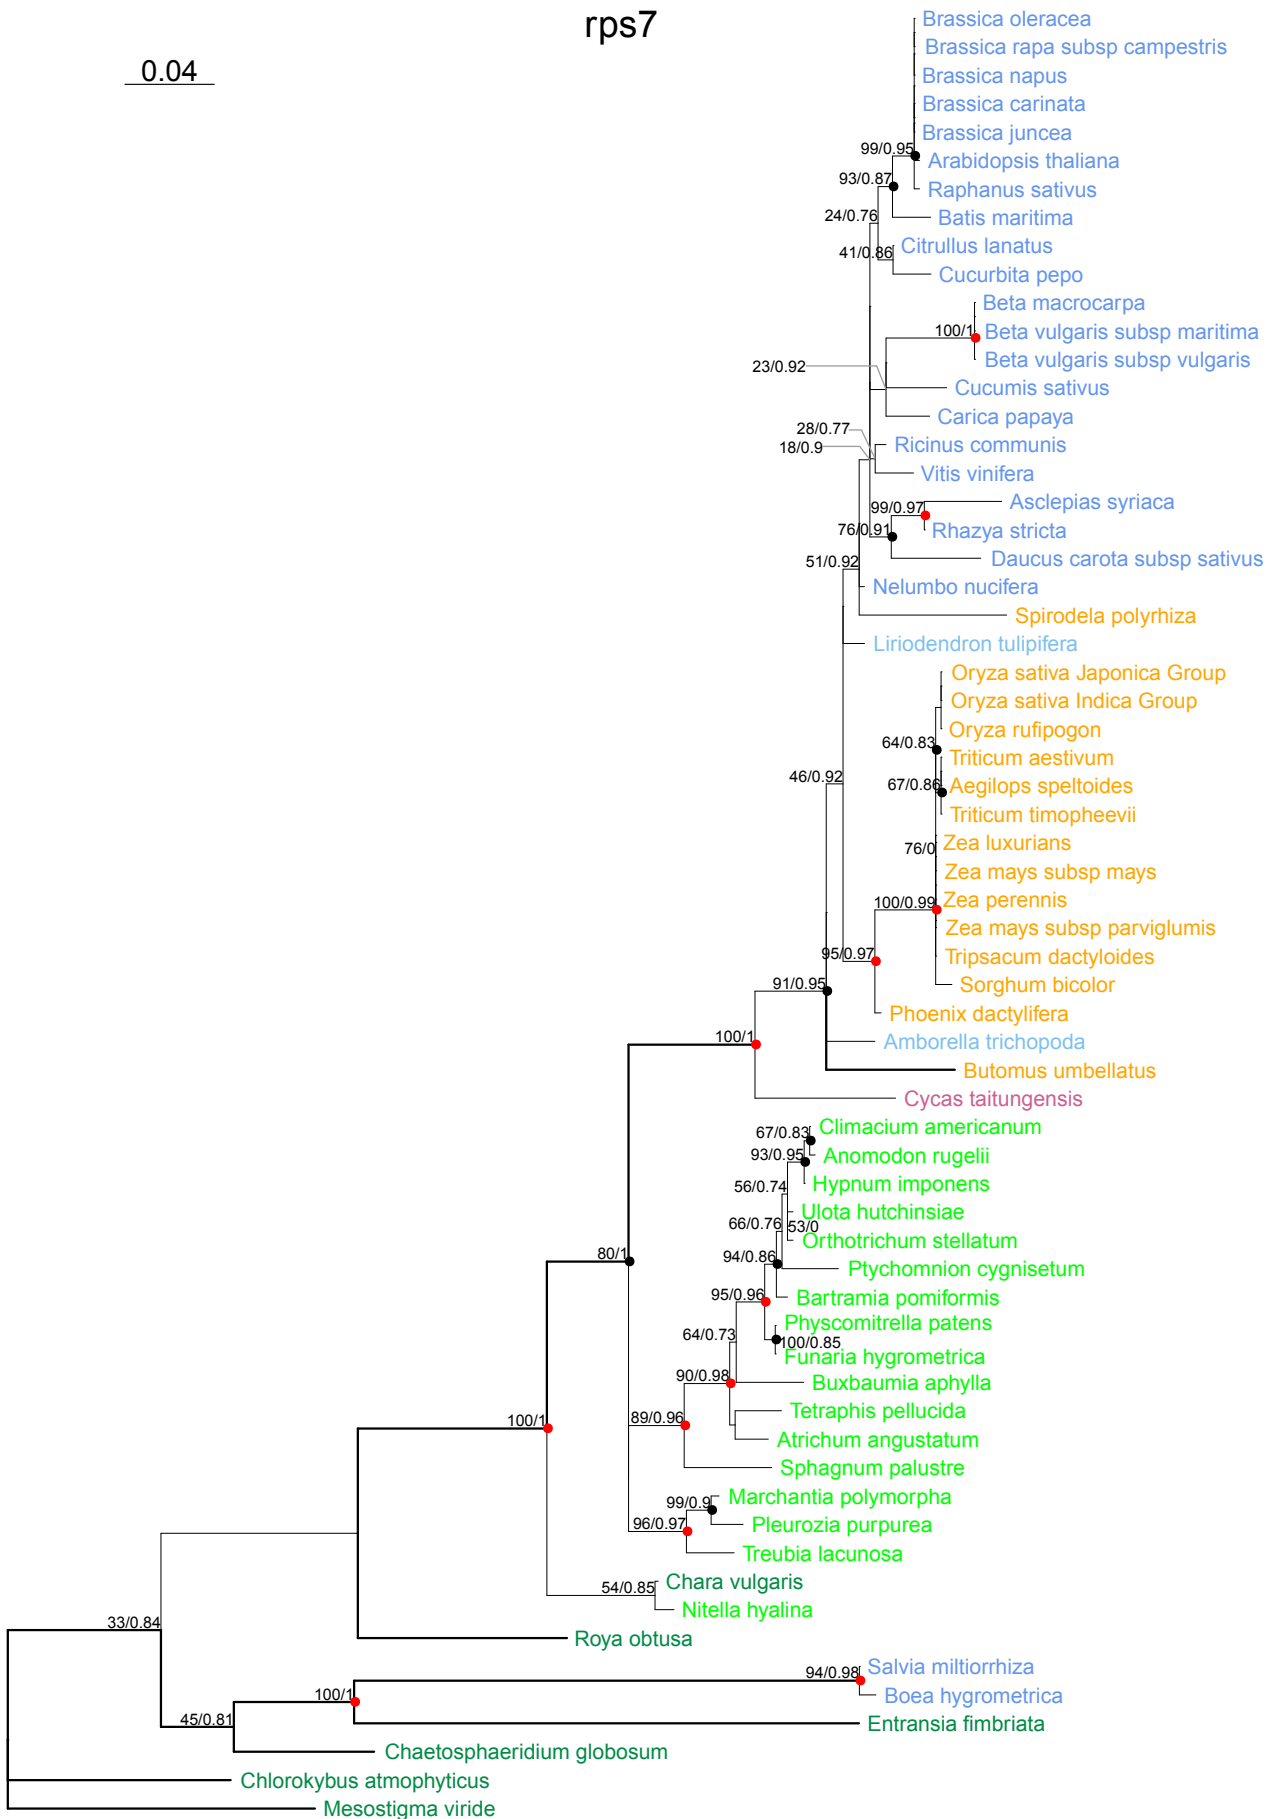

Figure S6 (continued)

rps10

0.06

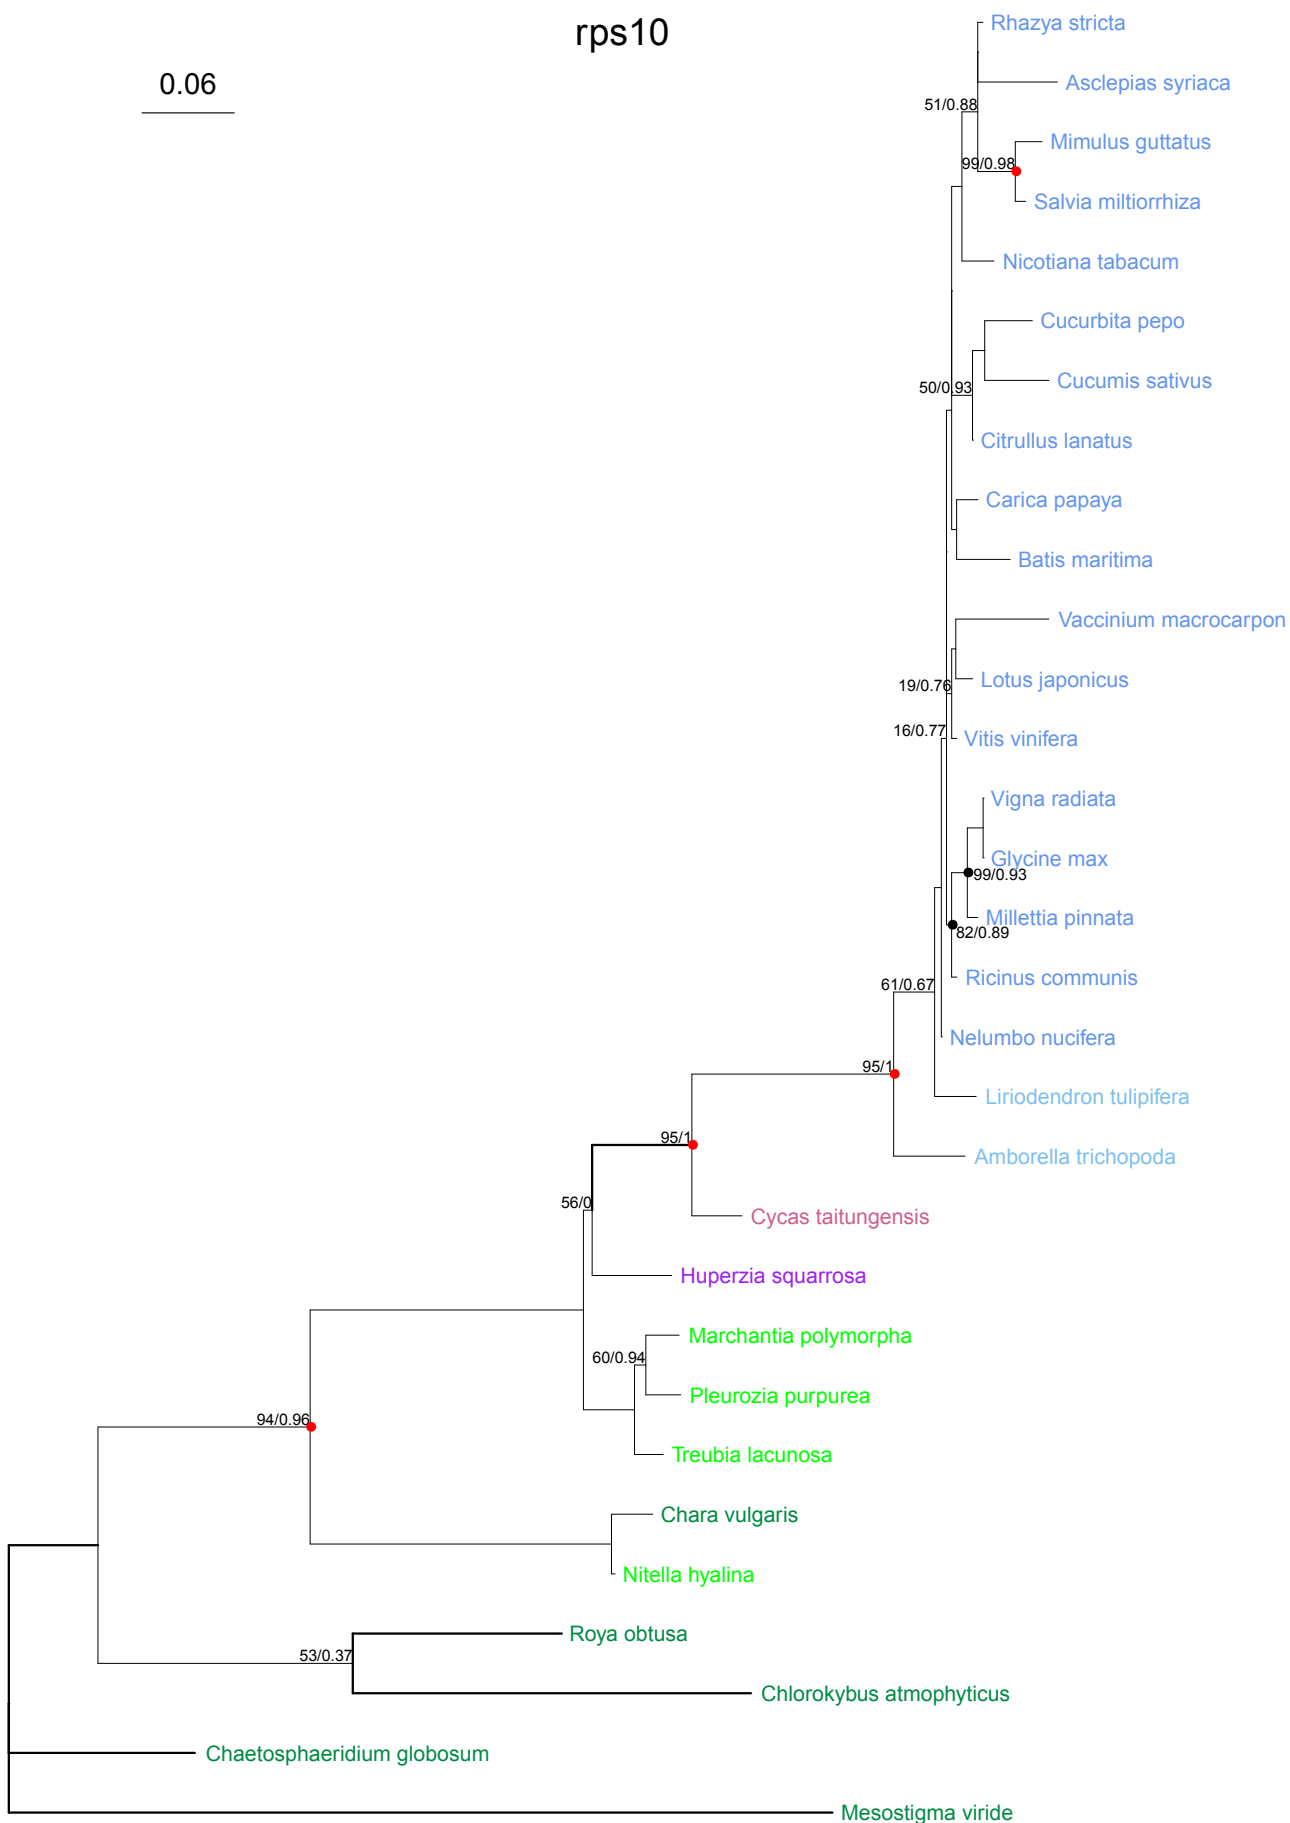



Figure S6 (continued)

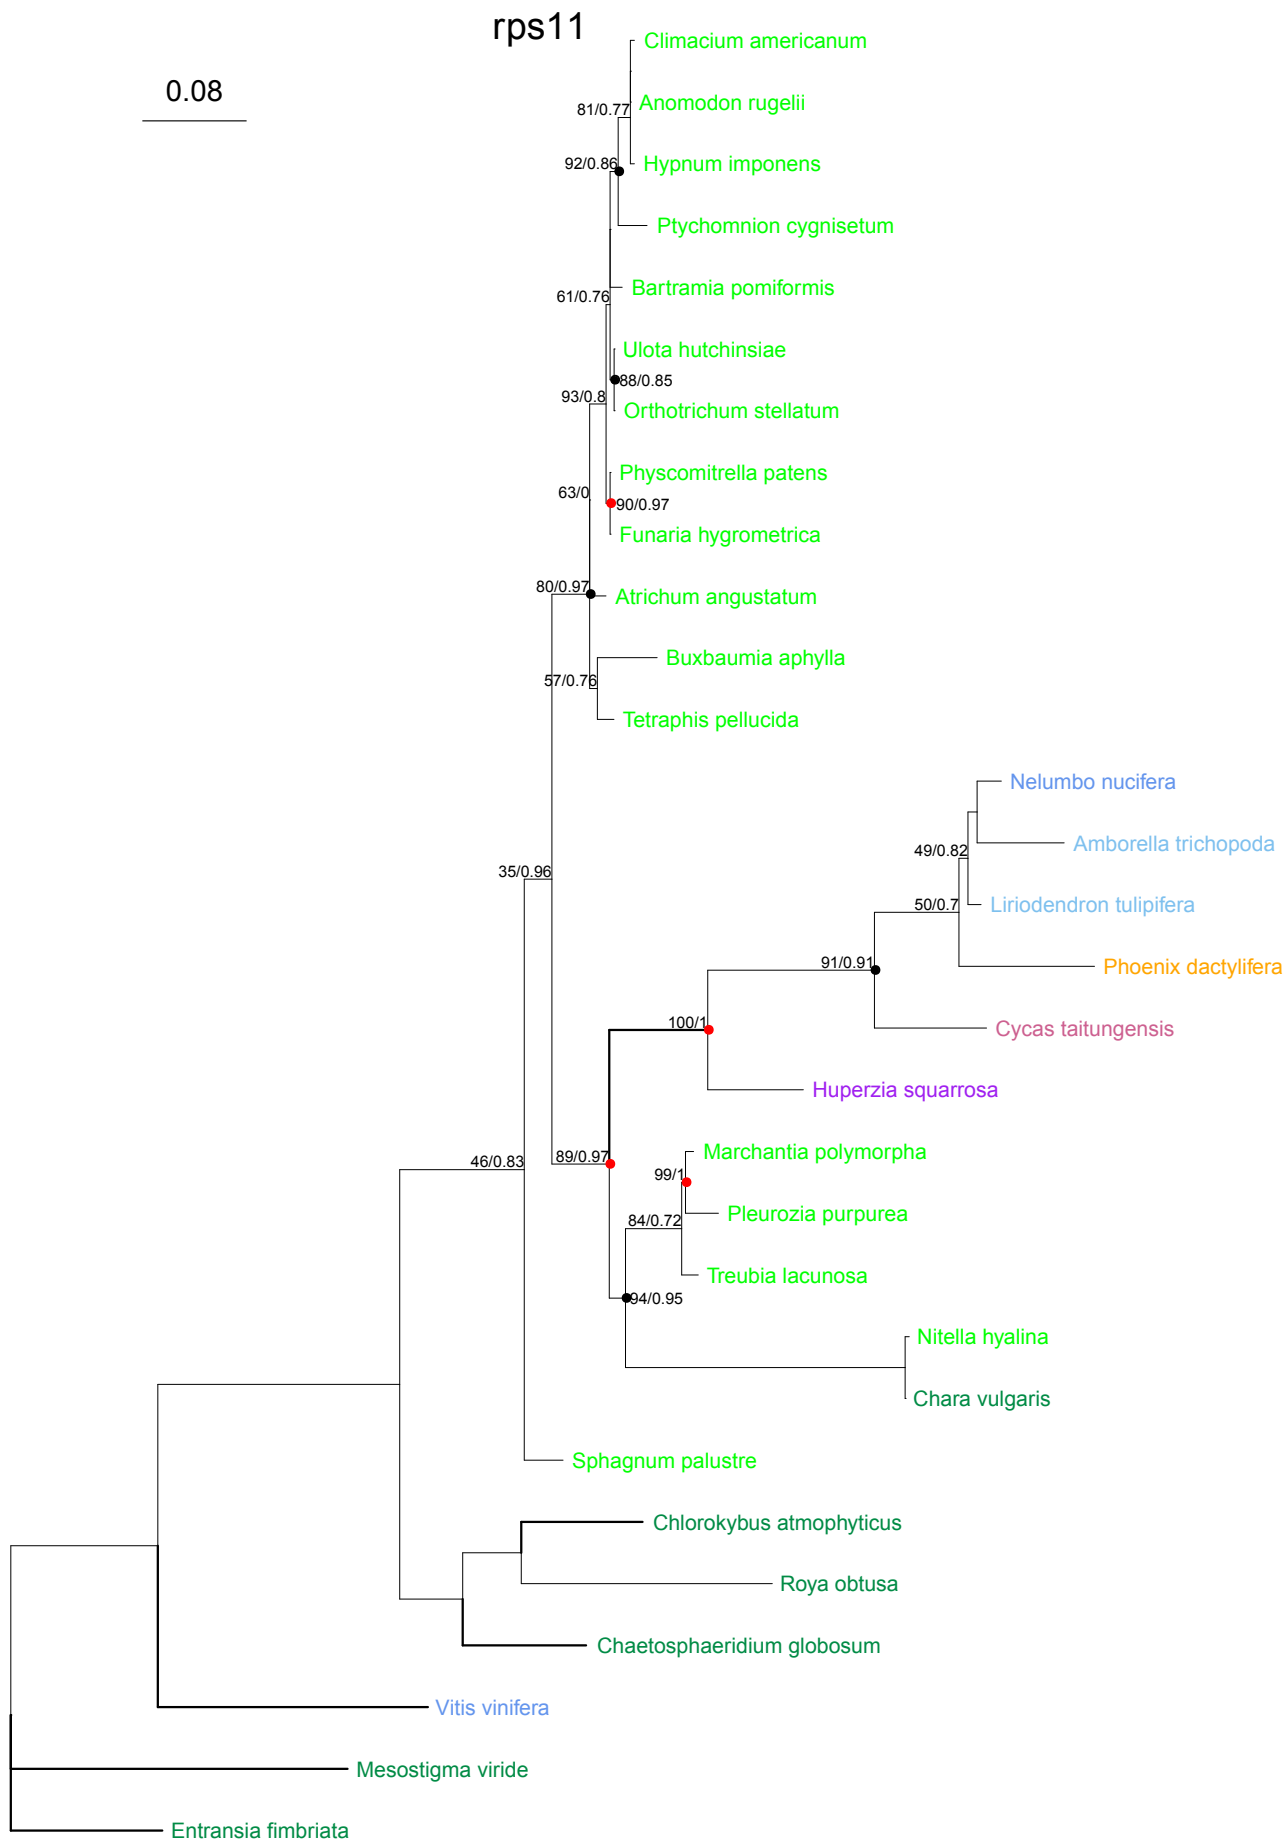

Figure S6 (continued)

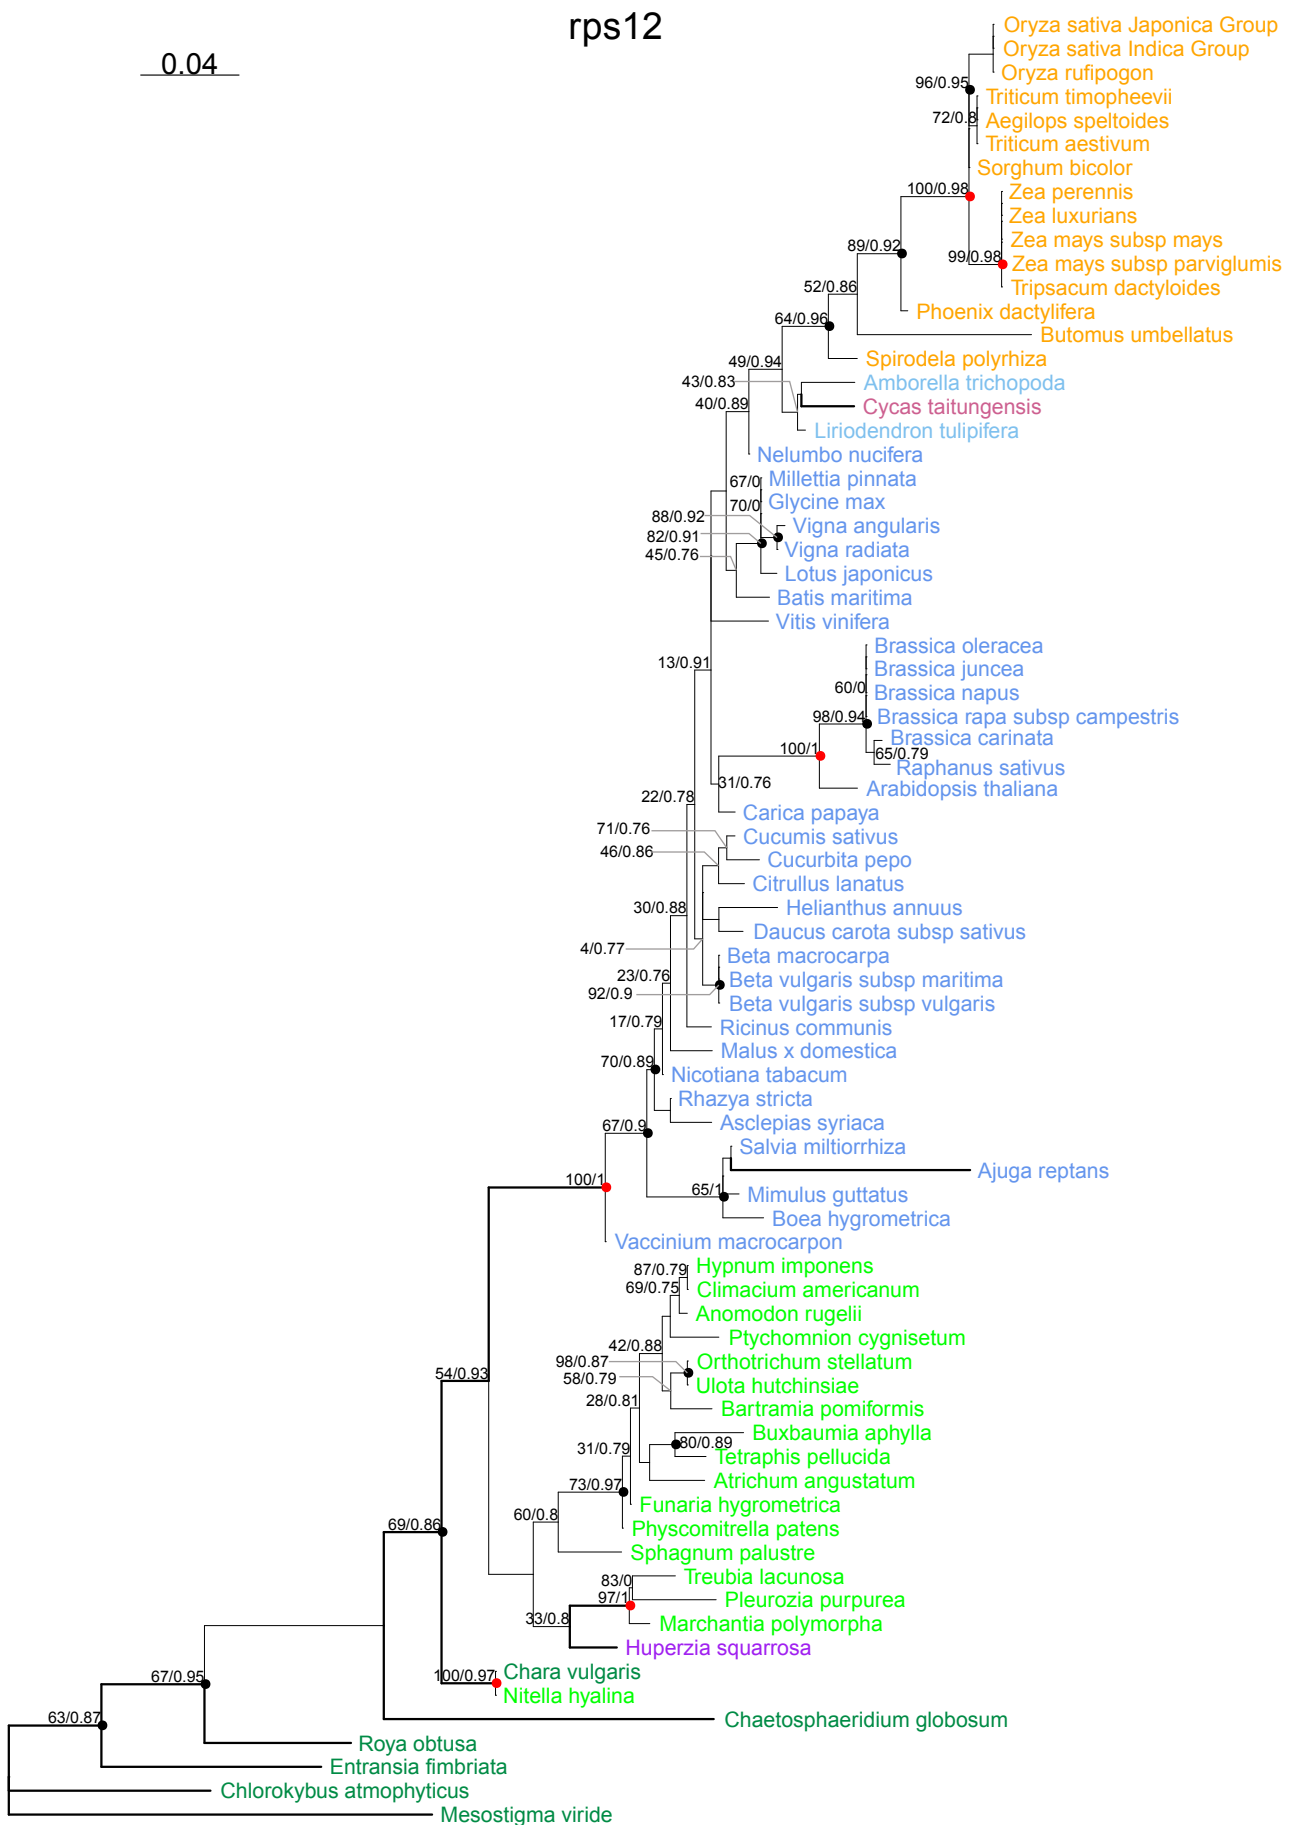

Figure S6 (continued)

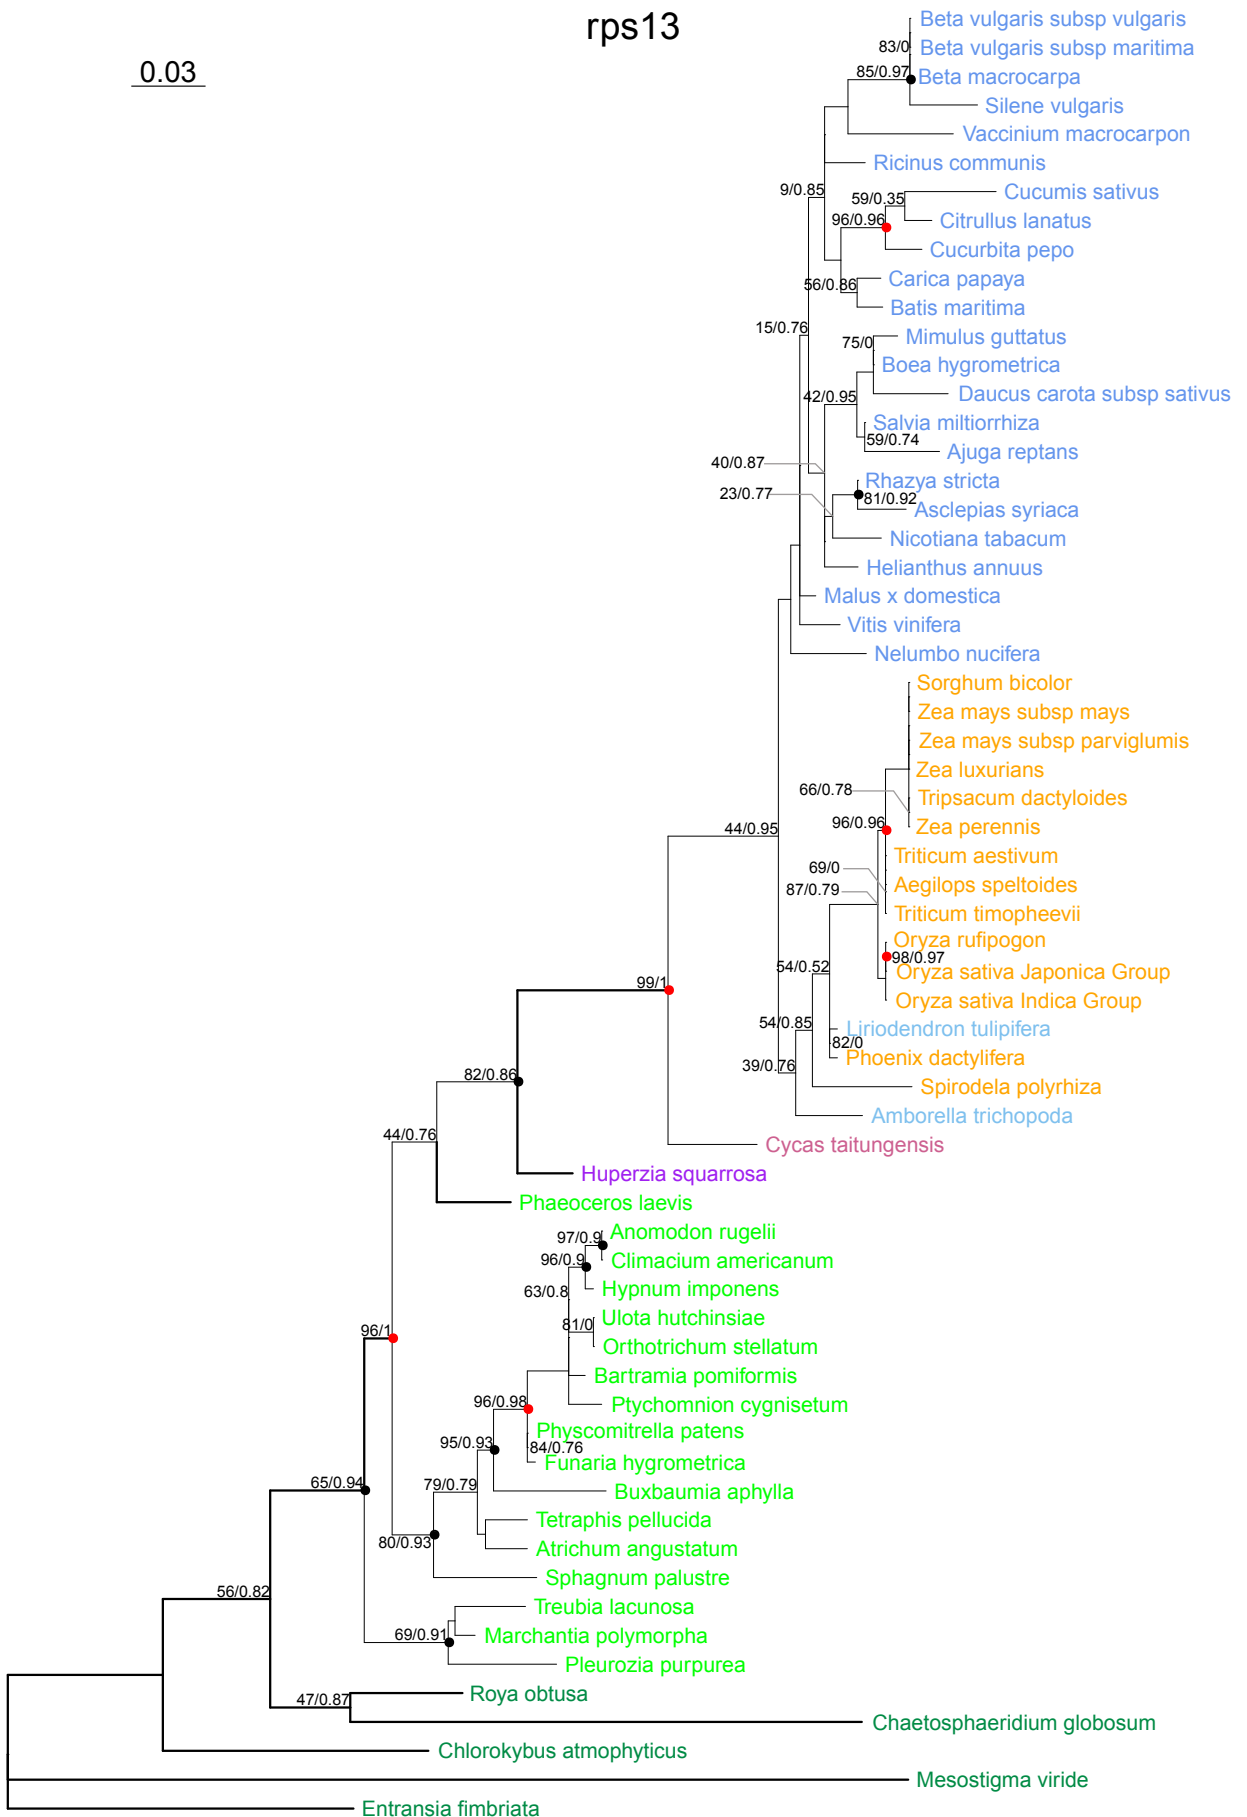

Figure S6 (continued)

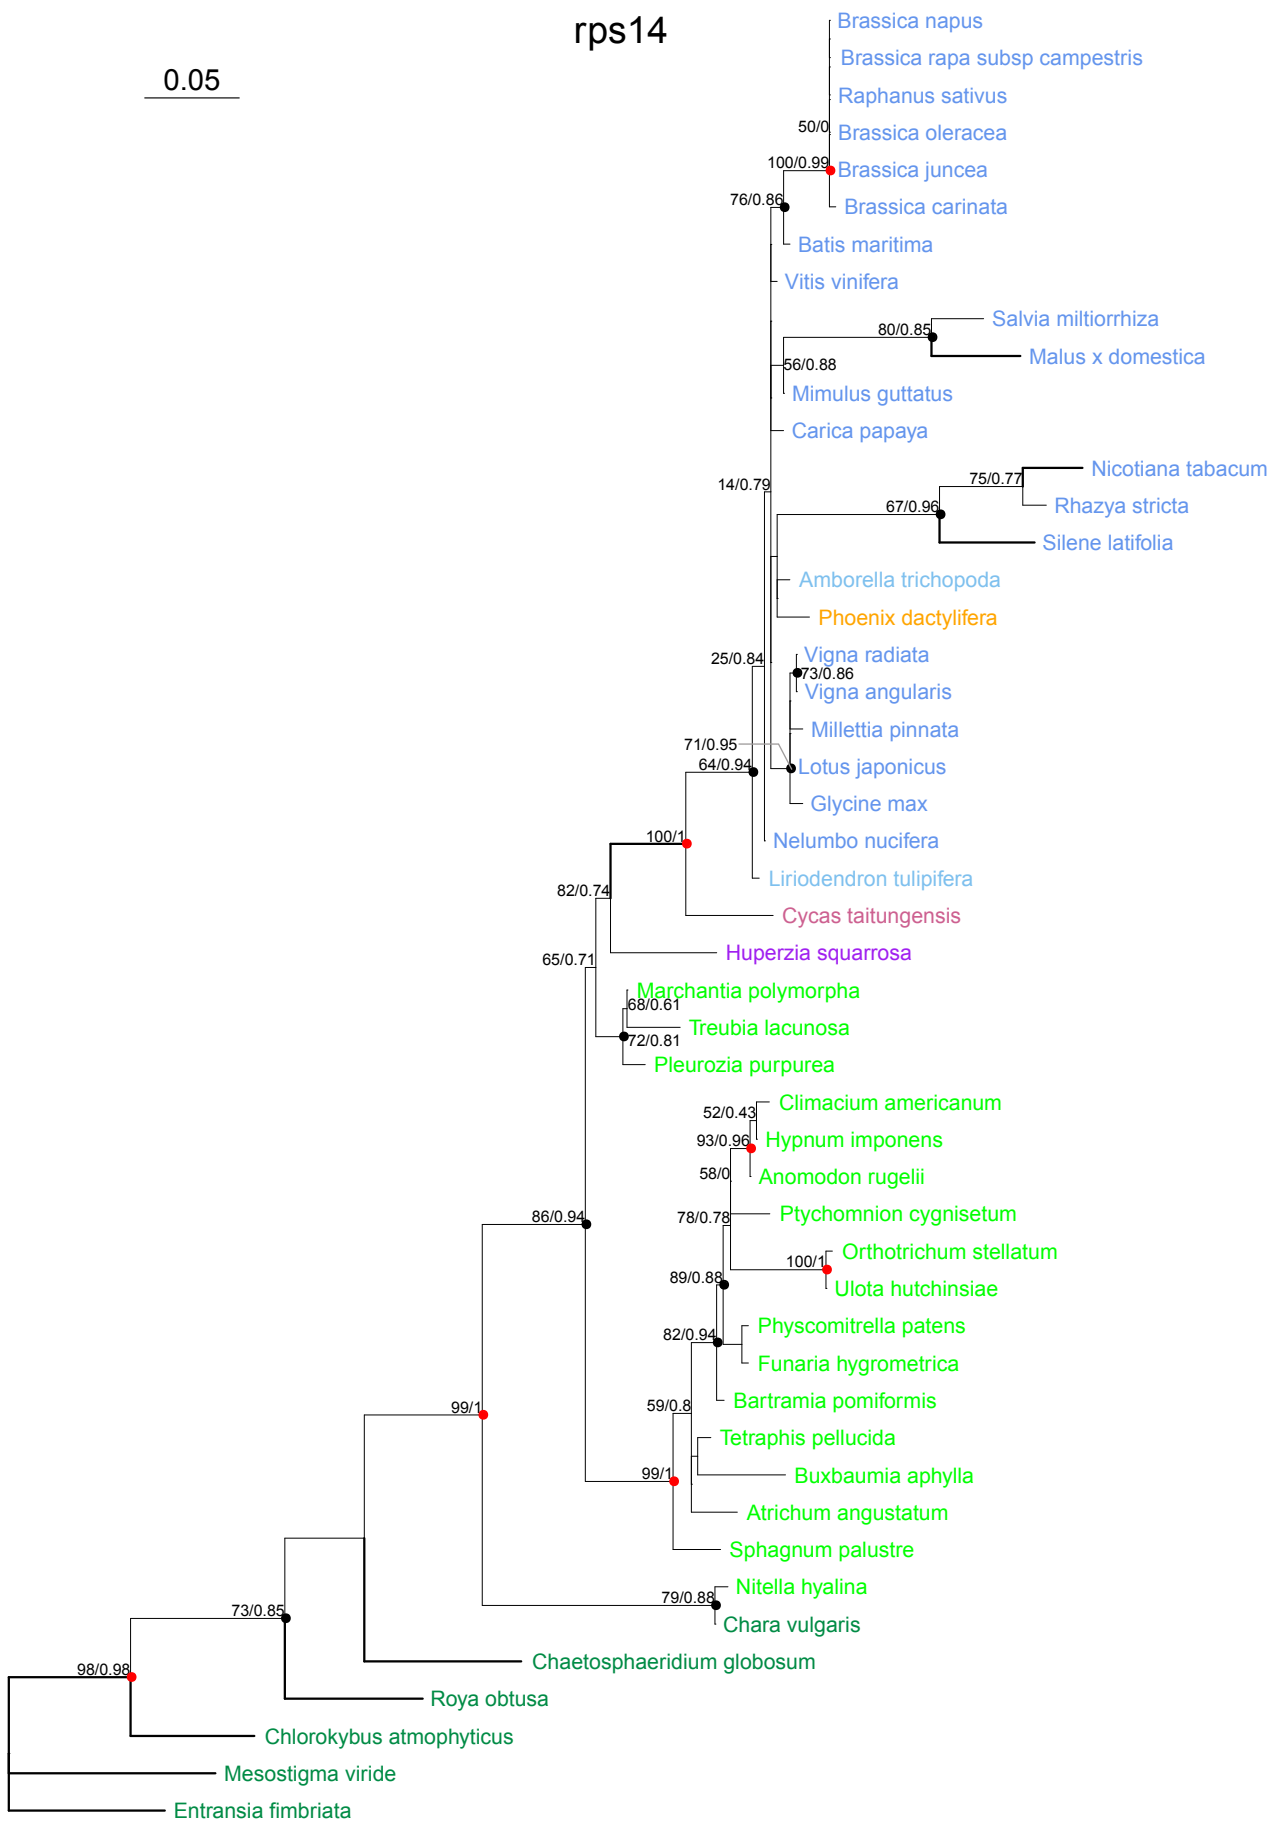

Figure S6 (continued)

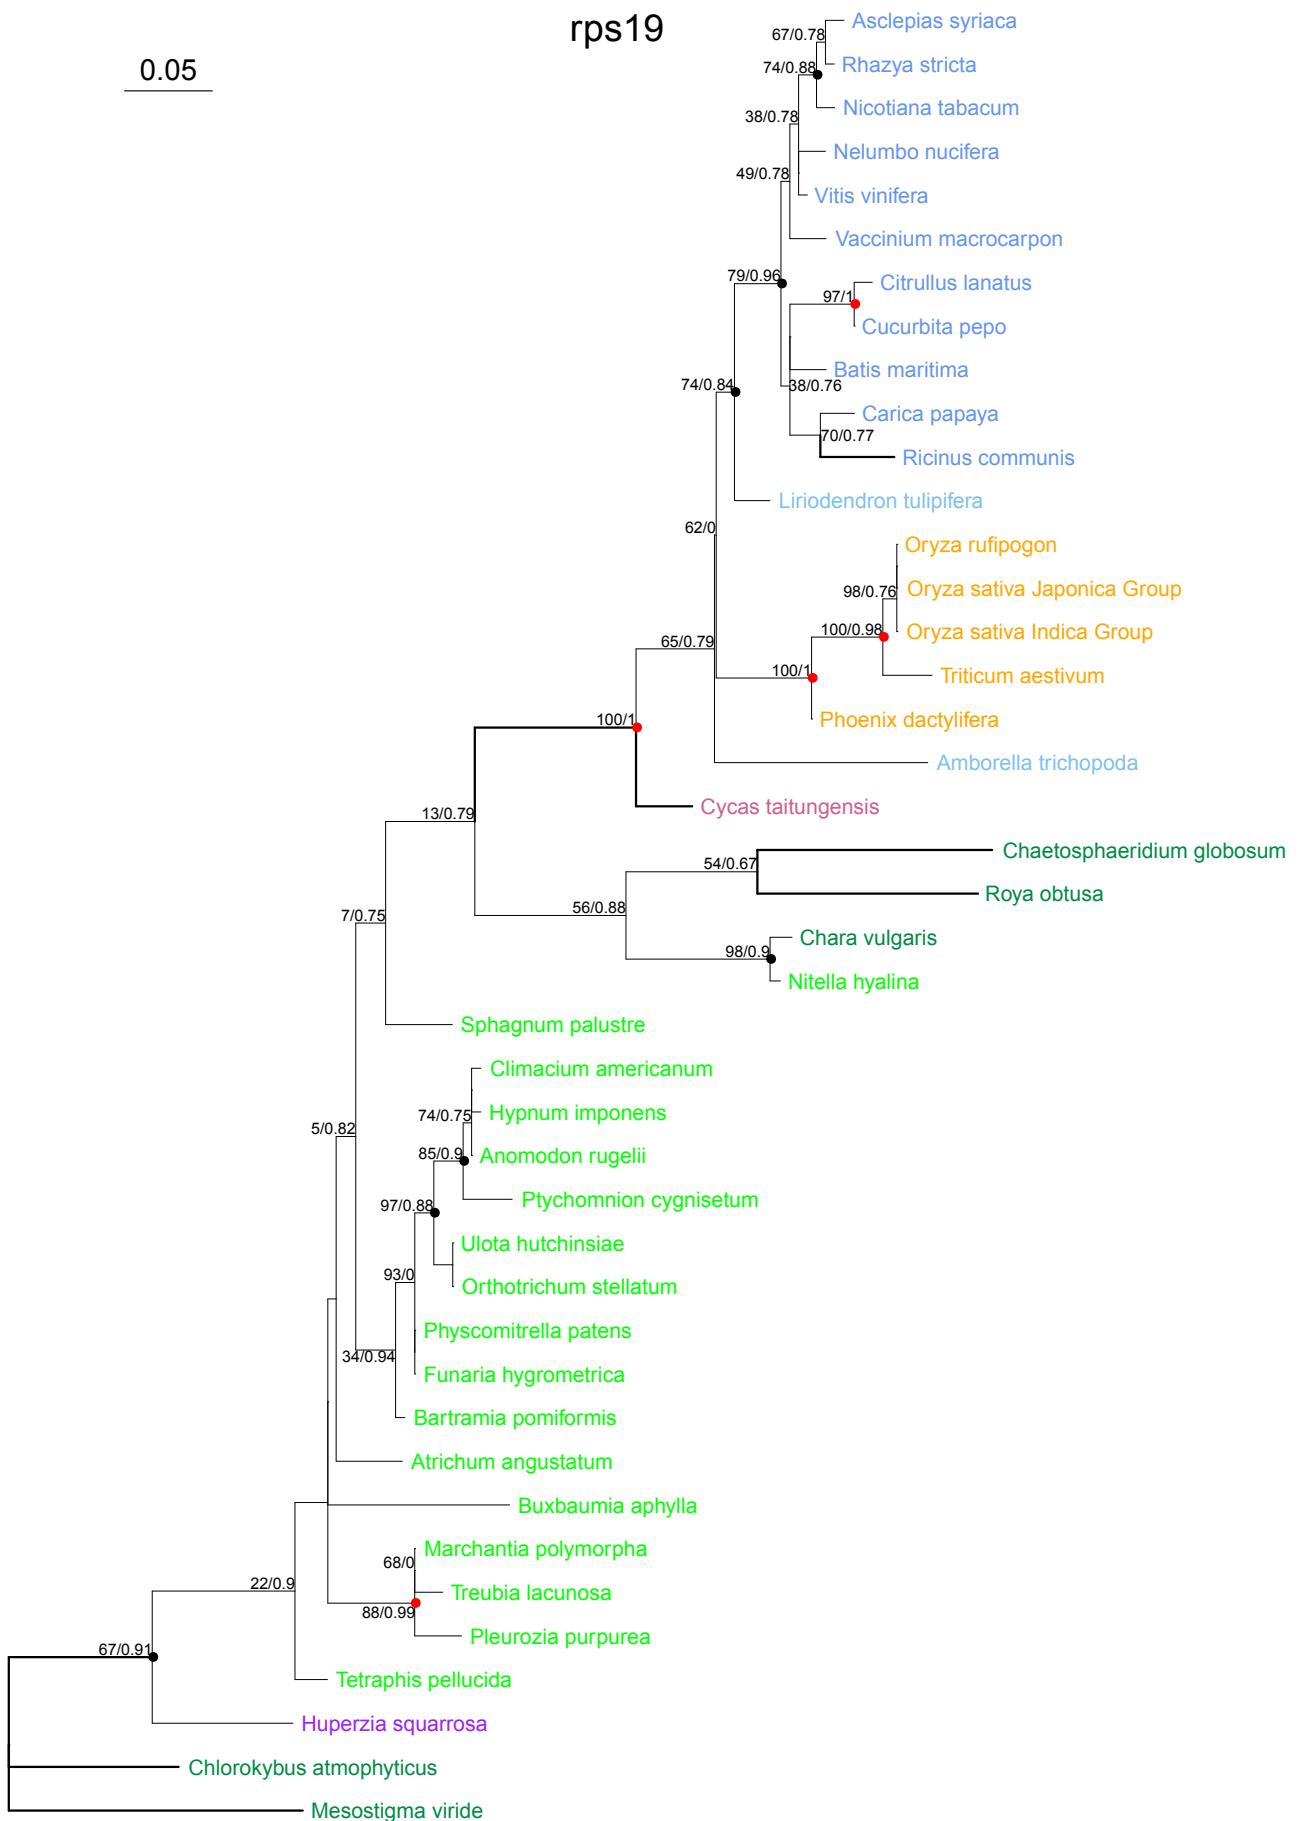

Figure S6 (continued)

sdh3

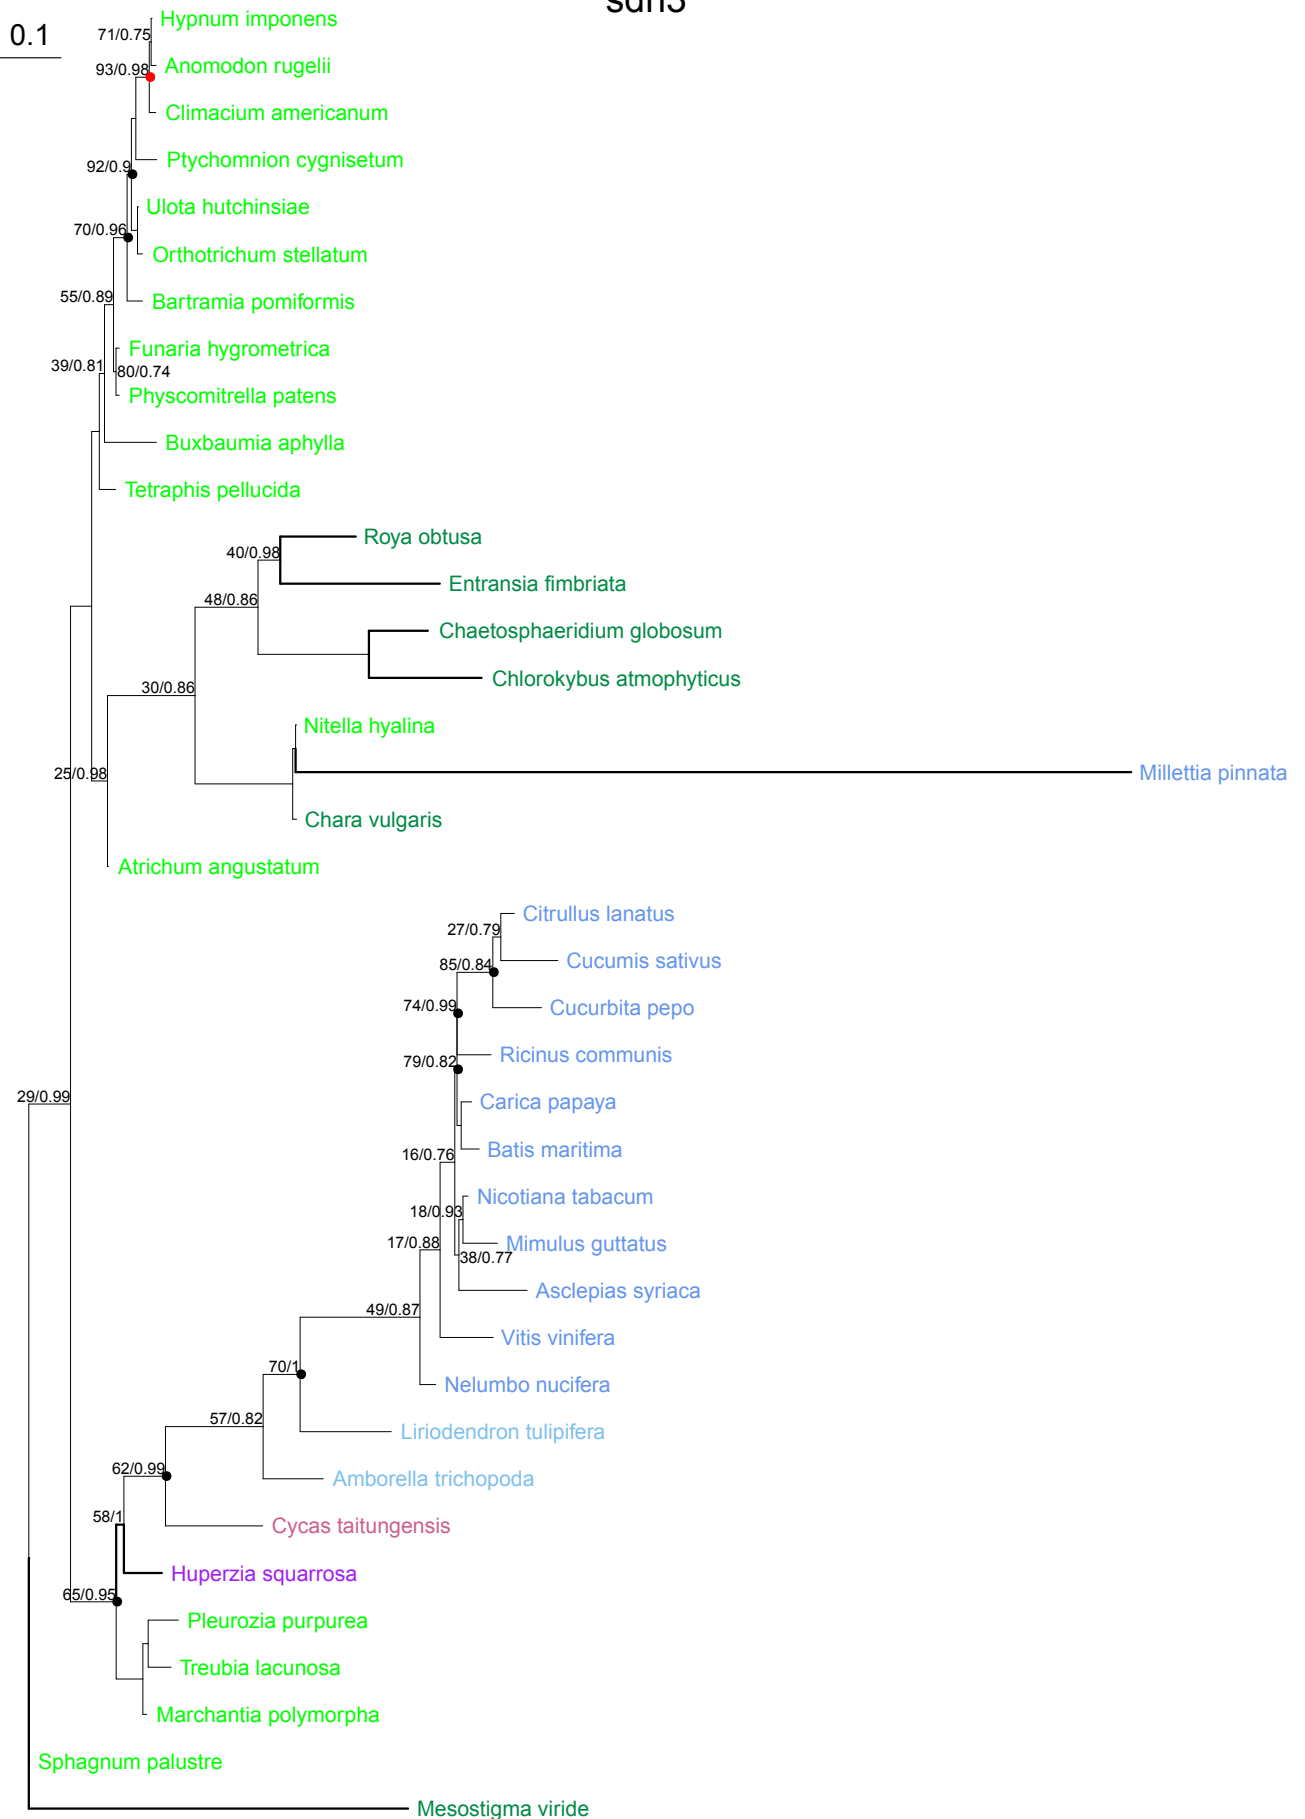

Figure S6 (continued)

sdh4

0.06

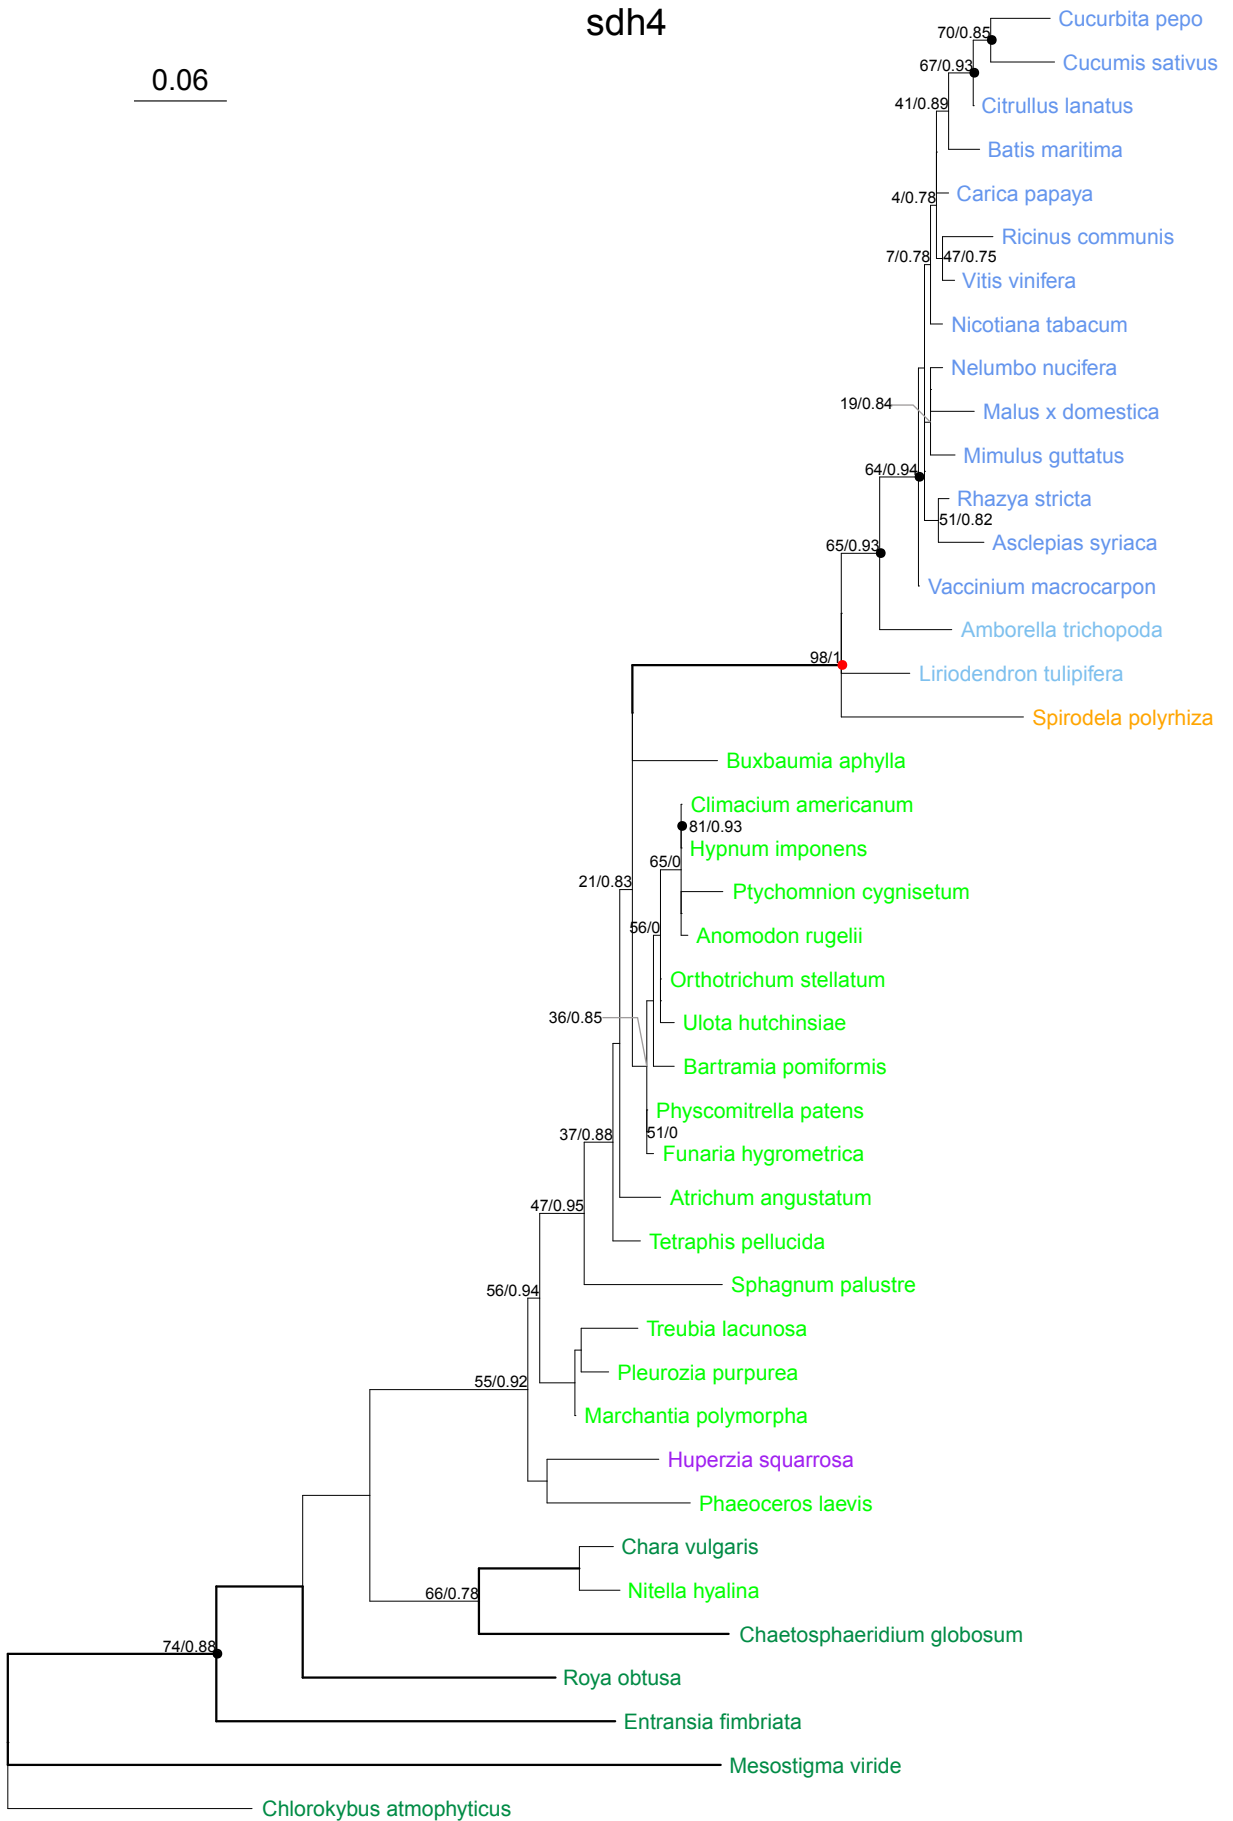

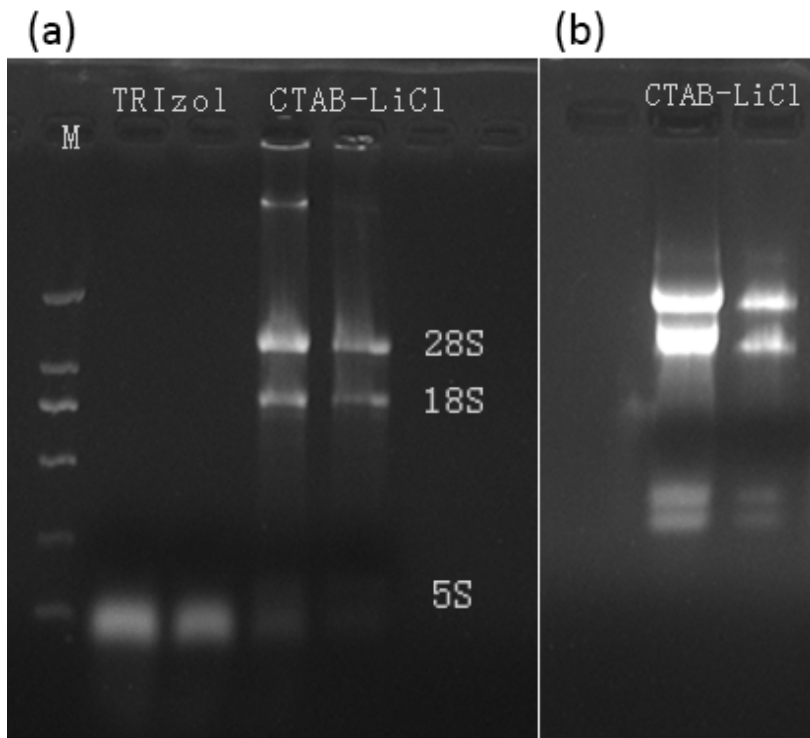

**Figure S7.** Total RNA isolation from *N. nucifera* using different methods. (a) Comparison of RNA isolation using TRIZOL and CTAB-LiCl methods. (b) The DNA-free RNA isolated using the CTAB-LiCl method.



**Table S1.** Primers used for verification of the assembly.

| Primers      | Sequences             | Position      | Length of Sanger Result (bp) * | Mismatch/ Indel                    |
|--------------|-----------------------|---------------|--------------------------------|------------------------------------|
| NnMt01F      | CGCGCTAGCCTATCACATCT  | 289866-289885 |                                |                                    |
| NnMt01R      | TCGATTTTCGATGCCCCGATT | 291118-291099 | 1,162                          | 0                                  |
| NnMt02F      | GGCCTGTCATCGAAGGATGT  | 20046-20065   |                                |                                    |
| NnMt02R      | AAAGCGACGTGTGTAGCTGA  | 21326-21307   | 1,184                          | 0                                  |
| NnMt03F      | GGTGGCACAAAAGCGTACAG  | 40063-40082   |                                |                                    |
| NnMt03R      | GGGAAGTGAAGGCGGAATGA  | 41196-41177   | 1,042                          | 0                                  |
| NnMt04F      | CTTTCCCCGATCGACCTAGC  | 50069-50088   |                                |                                    |
| NnMt04R      | GATGGGAACGGAGGCTGAAA  | 51389-51370   | 1,226                          | 0                                  |
| NnMt05F      | TGTCGTATGCCCTTGCCATT  | 60038-60057   |                                |                                    |
| NnMt05R      | GCTTCAACGGCAGCTCAAAA  | 61497-61478   | 1,367                          | 0                                  |
| NnMt06F      | CCACAATCAAGGTGGCAGGA  | 67011-67030   |                                |                                    |
| NnMt06R      | GCATGCAGTACCCGAGTCTT  | 68370-68351   | 1,262                          | 1 mismatch: A-T at position 68,132 |
| NnMt07F      | GCAAAGCTCGCAACTAGACG  | 110176-110195 |                                |                                    |
| NnMt07R      | AGTTTTCTCGCTTGCTCGGA  | 111271-111252 | 999                            | 0                                  |
| NnMt08F      | CTATTCGGGGAGGACTTCAGC | 130035-130055 |                                |                                    |
| NnMt08R      | ACCGTCAAGCGCTAGTGAAA  | 131256-131237 | 1,124                          | 0                                  |
| NnMt09F      | TCTTGAGGCCCAAAAATCG   | 150061-150080 |                                |                                    |
| NnMt09R      | TGGTGGGTGGGTAGGTAAA   | 151120-151101 | 960                            | 0                                  |
| NnMt10F      | TCGGTTGGACATTGGACTCG  | 230071-230090 |                                |                                    |
| NnMt10R      | CGGGAACAAAAGGAACAGCG  | 231384-231365 | 1,214                          | 0                                  |
| NnMt11F      | ATGGCATGGCAGTAAGCAGT  | 245112-245131 |                                |                                    |
| NnMt11R      | GTAGTGGTGCCTTCGACCACA | 246259-246240 | 1,046                          | 0                                  |
| NnMt12F      | CGAGAGAGCAGTGGATGGAC  | 260129-260148 |                                |                                    |
| NnMt12R      | ACCCGGTTTGTTCATTCG    | 261382-261363 | 1,151                          | 0                                  |
| NnMt13F      | GCTTGTGCGCTTATGCCCTT  | 360134-360153 |                                |                                    |
| NnMt13R      | GACTCTCCGGAGCCTAGA    | 361487-361468 | 1,265                          | 0                                  |
| NnMt14F      | AGCTTCCATCAACGCTCCAA  | 390058-390077 |                                |                                    |
| NnMt14R      | TAAAGATAGGCCGCTCTGCG  | 391082-391063 | 927                            | 0                                  |
| NnMt15F      | AGGATCAAACCGCTGCTGAA  | 410021-410040 |                                |                                    |
| NnMt15R      | GCTACCCCGAGGCGAAAATA  | 411176-411157 | 1,056                          | 0                                  |
| NnMt16F      | AAGTGACGGCTTTAGGCGAA  | 440089-440108 |                                |                                    |
| NnMt16R      | GCCGCCTTTGGTTGAATGTT  | 441089-441070 | 907                            | 0                                  |
| NnMt17F      | GCCTTAGTTCTTCCCCGCTT  | 465117-465136 |                                |                                    |
| NnMt17R      | CATCGCTCGGGATCAGAGAC  | 466239-466220 | 1,025                          | 0                                  |
| NnMt18F      | TCGCTCCTCCATCCAACCTA  | 500059-500078 |                                |                                    |
| NnMt18R      | AGCCAATAAGCTGGGGACAC  | 501408-501389 | 1,259                          | 0                                  |
| <b>Total</b> |                       |               | <b>20,176</b>                  | <b>1</b>                           |

\* PCR products were directly sequenced by ABI3730 sequencer, the primers (20 bp) and bases immediately following the primers (nearly 30 bp) were unable to be clearly sequenced, which makes the sequencing results nearly 100 bp shorter than PCR products.

**Table S2.** GC contents in whole genome and gene-coding regions of 79 plant mitochondrial genomes.

| Species                                | Whole genome  |        |             | Gene coding regions |        |             |
|----------------------------------------|---------------|--------|-------------|---------------------|--------|-------------|
|                                        | GC%           | GC No. | Length (bp) | GC%                 | GC No. | Length (bp) |
| <i>Brassica juncea</i>                 | 45.24%        | 99414  | 219766      | 44.19%              | 22327  | 50526       |
| <i>Brassica rapa subsp. campestris</i> | 45.24%        | 99413  | 219747      | 44.19%              | 22327  | 50526       |
| <i>Brassica oleracea</i>               | 45.20%        | 162839 | 360271      | 44.13%              | 21361  | 48408       |
| <i>Brassica napus</i>                  | 45.19%        | 100246 | 221853      | 44.09%              | 22560  | 51165       |
| <i>Brassica carinata</i>               | 45.33%        | 105268 | 232241      | 44.08%              | 20526  | 46569       |
| <i>Raphanus sativus</i>                | 45.21%        | 116844 | 258426      | 42.62%              | 13396  | 31434       |
| <i>Arabidopsis thaliana</i>            | 44.77%        | 164270 | 366924      | 44.14%              | 30431  | 68940       |
| <i>Batis maritima</i>                  | 45.41%        | 183433 | 403930      | 44.49%              | 27232  | 61209       |
| <i>Carica papaya</i>                   | 45.12%        | 215159 | 476890      | 43.18%              | 14669  | 33972       |
| <i>Ricinus communis</i>                | 44.98%        | 226159 | 502773      | 42.46%              | 13333  | 31398       |
| <i>Vigna angularis</i>                 | 45.19%        | 182769 | 404466      | 43.23%              | 10078  | 23313       |
| <i>Vigna radiata</i>                   | 45.11%        | 181015 | 401262      | 42.98%              | 12461  | 28992       |
| <i>Glycine max</i>                     | 45.03%        | 181275 | 402558      | 44.52%              | 24650  | 55365       |
| <i>Milletia pinnata</i>                | 45.00%        | 191586 | 425718      | 42.91%              | 14660  | 34164       |
| <i>Lotus japonicus</i>                 | 45.40%        | 172892 | 380861      | 43.09%              | 13508  | 31347       |
| <i>Cucurbita pepo</i>                  | 42.80%        | 420617 | 982833      | 43.24%              | 13941  | 32244       |
| <i>Cucumis sativus</i>                 | 44.27%        | 688858 | 1555935     | 43.26%              | 14079  | 32547       |
| <i>Citrullus lanatus</i>               | 45.08%        | 170955 | 379236      | 43.10%              | 14026  | 32544       |
| <i>Malus x domestica</i>               | 45.39%        | 180170 | 396947      | 43.08%              | 12723  | 29532       |
| <i>Ajuga reptans</i>                   | 45.10%        | 158773 | 352069      | 44.14%              | 12228  | 27702       |
| <i>Salvia miltiorrhiza</i>             | 44.39%        | 221599 | 499236      | 43.32%              | 33098  | 76401       |
| <i>Mimulus guttatus</i>                | 45.14%        | 237296 | 525671      | 42.30%              | 14979  | 35412       |
| <i>Boea hygrometrica</i>               | 43.27%        | 220910 | 510519      | 41.68%              | 13034  | 31272       |
| <i>Daucus carota subsp. sativus</i>    | 45.42%        | 127686 | 281132      | 44.43%              | 26105  | 58752       |
| <i>Helianthus annuus</i>               | 45.05%        | 135568 | 300945      | 43.45%              | 9802   | 22560       |
| <i>Rhazya stricta</i>                  | 43.68%        | 239616 | 548608      | 42.41%              | 16753  | 39504       |
| <i>Asclepias syriaca</i>               | 43.43%        | 296387 | 682498      | 42.51%              | 13138  | 30906       |
| <i>Nicotiana tabacum</i>               | 44.96%        | 193590 | 430597      | 44.50%              | 37108  | 83388       |
| <i>Vaccinium macrocarpon</i>           | 45.33%        | 208393 | 459678      | 42.72%              | 11702  | 27390       |
| <i>Beta vulgaris subsp. maritima</i>   | 43.91%        | 160240 | 364950      | 42.57%              | 42856  | 100683      |
| <i>Beta vulgaris subsp. vulgaris</i>   | 43.86%        | 161748 | 368801      | 42.60%              | 37957  | 89100       |
| <i>Beta macrocarpa</i>                 | 43.89%        | 169084 | 385220      | 42.60%              | 43533  | 102195      |
| <i>Silene latifolia</i>                | 42.56%        | 107849 | 253413      | 40.68%              | 12361  | 30387       |
| <i>Silene vulgaris</i>                 | 41.80%        | 178548 | 427138      | <b>45.44%</b>       | 18856  | 41492       |
| <i>Vitis vinifera</i>                  | 44.14%        | 341361 | 773279      | 42.45%              | 21005  | 49479       |
| <i>Nelumbo nucifera</i>                | <b>48.16%</b> | 252718 | 524797      | <b>46.12%</b>       | 22130  | 47979       |
| <i>Zea luxurians</i>                   | 43.93%        | 236964 | 539368      | 43.09%              | 13711  | 31818       |
| <i>Zea perennis</i>                    | 43.88%        | 250299 | 570354      | 42.88%              | 13441  | 31347       |
| <i>Zea mays subsp. mays</i>            | 43.93%        | 250256 | 569630      | 43.31%              | 42864  | 98976       |

Table S2. (continued)

|                                    |               |         |         |               |       |       |
|------------------------------------|---------------|---------|---------|---------------|-------|-------|
| <i>Zea mays subsp. parviglumis</i> | 43.88%        | 298643  | 680603  | 43.64%        | 16504 | 37818 |
| <i>Tripsacum dactyloides</i>       | 43.93%        | 309277  | 704100  | 43.36%        | 15098 | 34818 |
| <i>Sorghum bicolor</i>             | 43.73%        | 204917  | 468628  | 42.79%        | 13423 | 31368 |
| <i>Oryza rufipogon</i>             | 44.04%        | 246189  | 559045  | 44.12%        | 14372 | 32574 |
| <i>Oryza sativa Japonica Group</i> | 43.85%        | 215104  | 490520  | 43.86%        | 19659 | 44826 |
| <i>Oryza sativa Indica Group</i>   | 43.84%        | 215466  | 491515  | 43.64%        | 20077 | 46008 |
| <i>Triticum timopheevii</i>        | 44.35%        | 196659  | 443419  | 42.72%        | 14563 | 34089 |
| <i>Triticum aestivum</i>           | 44.35%        | 200705  | 452528  | 42.40%        | 15307 | 36099 |
| <i>Aegilops speltoides</i>         | 44.43%        | 211504  | 476091  | 42.76%        | 14075 | 32913 |
| <i>Phoenix dactylifera</i>         | 45.14%        | 322781  | 715001  | 44.12%        | 16879 | 38253 |
| <i>Butomus umbellatus</i>          | <b>49.10%</b> | 221355  | 450826  | 44.97%        | 12770 | 28395 |
| <i>Spirodela polyrhiza</i>         | 45.70%        | 104423  | 228493  | 43.27%        | 13320 | 30780 |
| <i>Liriodendron tulipifera</i>     | <b>47.70%</b> | 264146  | 553721  | 44.49%        | 15748 | 35397 |
| <i>Amborella trichopoda</i>        | 45.92%        | 1775336 | 3866039 | <b>48.99%</b> | 37895 | 77354 |
| <i>Cycas taitungensis</i>          | 46.92%        | 194668  | 414903  | 45.30%        | 15625 | 34494 |
| <i>Huperzia squarrosa</i>          | 44.16%        | 182632  | 413530  | 43.40%        | 30642 | 70599 |
| <i>Phaeoceros laevis</i>           | 44.60%        | 93438   | 209482  | 38.79%        | 9401  | 24237 |
| <i>Hypnum imponens</i>             | 40.91%        | 42481   | 103830  | 36.30%        | 11743 | 32346 |
| <i>Anomodon rugelii</i>            | 41.20%        | 42948   | 104239  | 37.77%        | 14249 | 37728 |
| <i>Climacium americanum</i>        | 41.05%        | 43124   | 105048  | 36.46%        | 11799 | 32361 |
| <i>Ptychomnion cygnisetum</i>      | 42.07%        | 43950   | 104480  | 37.56%        | 11928 | 31761 |
| <i>Orthotrichum stellatum</i>      | 39.84%        | 41482   | 104131  | 35.48%        | 11471 | 32328 |
| <i>Ulota hutchinsiae</i>           | 39.80%        | 41632   | 104608  | 35.46%        | 11462 | 32325 |
| <i>Bartramia pomiformis</i>        | 39.05%        | 41473   | 106198  | 34.92%        | 11290 | 32328 |
| <i>Physcomitrella patens</i>       | 40.57%        | 42734   | 105340  | 36.45%        | 13012 | 35703 |
| <i>Funaria hygrometrica</i>        | 40.39%        | 44267   | 109586  | 35.70%        | 11544 | 32337 |
| <i>Buxbaumia aphylla</i>           | 40.08%        | 40367   | 100725  | 36.30%        | 11286 | 31095 |
| <i>Tetraphis pellucida</i>         | 42.53%        | 45818   | 107730  | 37.99%        | 13200 | 34746 |
| <i>Atrichum angustatum</i>         | 40.51%        | 46647   | 115146  | 35.90%        | 11619 | 32367 |
| <i>Sphagnum palustre</i>           | 38.99%        | 55088   | 141276  | 35.15%        | 11408 | 32457 |
| <i>Marchantia polymorpha</i>       | 42.41%        | 79139   | 186609  | 40.66%        | 25708 | 63225 |
| <i>Pleurozia purpurea</i>          | 45.37%        | 76462   | 168526  | 41.42%        | 18282 | 44139 |
| <i>Treubia lacunosa</i>            | 43.38%        | 65928   | 151983  | 41.57%        | 21913 | 52710 |
| <i>Nitella hyalina</i>             | 40.83%        | 32744   | 80193   | 38.03%        | 15828 | 41625 |
| <i>Chara vulgaris</i>              | 40.90%        | 27704   | 67737   | 37.68%        | 14884 | 39504 |
| <i>Roya obtusa</i>                 | 26.83%        | 18637   | 69465   | 27.22%        | 8881  | 32622 |
| <i>Chaetosphaeridium globosum</i>  | 34.41%        | 19466   | 56574   | 31.84%        | 10016 | 31455 |
| <i>Entransia fimbriata</i>         | 42.70%        | 26325   | 61645   | 36.28%        | 10019 | 27618 |
| <i>Chlorokybus atmophyticus</i>    | 39.80%        | 80298   | 201763  | 36.24%        | 17387 | 47976 |
| <i>Mesostigma viride</i>           | 32.21%        | 13666   | 42424   | 31.31%        | 8694  | 27771 |

\* The top three GC content percentage in each column are highlighted in bold

**Table S3.** The SSR sites identified in the *N. nucifera* mitochondrial genome.

| SSR number | SSR type | SSR motif    | size | start  | end    |
|------------|----------|--------------|------|--------|--------|
| 1          | p5       | (GCGTA)3     | 15   | 5709   | 5723   |
| 2          | p5       | (AGCGA)3     | 15   | 5728   | 5742   |
| 3          | p3       | (AAC)4       | 12   | 5993   | 6004   |
| 4          | p2       | (TC)5        | 10   | 7867   | 7876   |
| 5          | p4       | (TAAT)3      | 12   | 7952   | 7963   |
| 6          | p4       | (GGCG)3      | 12   | 10892  | 10903  |
| 7          | p4       | (GAAA)3      | 12   | 11196  | 11207  |
| 8          | p4       | (CTTC)3      | 12   | 15712  | 15723  |
| 9          | p5       | (TCCTT)3     | 15   | 15964  | 15978  |
| 10         | p4       | (CTTC)3      | 12   | 16019  | 16030  |
| 11         | p4       | (TAGT)3      | 12   | 17181  | 17192  |
| 12         | p5       | (CAGTC)3     | 15   | 22845  | 22859  |
| 13         | p2       | (AG)5        | 10   | 23304  | 23313  |
| 14         | p3       | (CGC)4       | 12   | 28404  | 28415  |
| 15         | p4       | (GTTC)3      | 12   | 31082  | 31093  |
| 16         | p4       | (AGAC)3      | 12   | 31599  | 31610  |
| 17         | p4       | (CTTT)3      | 12   | 35249  | 35260  |
| 18         | p4       | (GTTC)3      | 12   | 36888  | 36899  |
| 19         | p4       | (GAAA)3      | 12   | 37046  | 37057  |
| 20         | p4       | (ATTC)3      | 12   | 40480  | 40491  |
| 21         | p3       | (GAT)4       | 12   | 47607  | 47618  |
| 22         | p4       | (TAGG)3      | 12   | 47819  | 47830  |
| 23         | p3       | (TTC)6       | 18   | 53520  | 53537  |
| 24         | p4       | (ATTA)3      | 12   | 55620  | 55631  |
| 25         | p2       | (AG)5        | 10   | 55706  | 55715  |
| 26         | p3       | (GTT)4       | 12   | 57579  | 57590  |
| 27         | p5       | (CTTCG)3     | 15   | 57839  | 57853  |
| 28         | p5       | (GCTAC)3     | 15   | 57858  | 57872  |
| 29         | p4       | (TTCC)3      | 12   | 64035  | 64046  |
| 30         | p5       | (TAGTA)3     | 15   | 64975  | 64989  |
| 31         | p3       | (CTA)4       | 12   | 67584  | 67595  |
| 32         | c*       | (ATA)5(AT)5* | 22   | 67904  | 67925  |
| 33         | p2       | (TA)5        | 10   | 67962  | 67971  |
| 34         | p2       | (AT)5        | 10   | 67996  | 68005  |
| 35         | p3       | (ATA)4       | 12   | 68037  | 68048  |
| 36         | p2       | (TA)6        | 12   | 68063  | 68074  |
| 37         | p3       | (ATT)7       | 21   | 68111  | 68131  |
| 38         | p1       | (T)11        | 11   | 69654  | 69664  |
| 39         | p5       | (CTAGT)3     | 15   | 72558  | 72572  |
| 40         | p4       | (AATG)5      | 20   | 73134  | 73153  |
| 41         | p6       | (AGTGGGA)3   | 18   | 78248  | 78265  |
| 42         | p5       | (GATGA)3     | 15   | 89952  | 89966  |
| 43         | p2       | (TA)6        | 12   | 90564  | 90575  |
| 44         | p4       | (TTCC)3      | 12   | 92607  | 92618  |
| 45         | p5       | (GGCCT)3     | 15   | 97282  | 97296  |
| 46         | p4       | (GAGC)3      | 12   | 100719 | 100730 |
| 47         | p4       | (GCTA)3      | 12   | 101821 | 101832 |
| 48         | p4       | (GGCC)3      | 12   | 104632 | 104643 |
| 49         | p1       | (T)11        | 11   | 104811 | 104821 |
| 50         | p6       | (AGAATA)3    | 18   | 104823 | 104840 |
| 51         | p2       | (AC)5        | 10   | 112192 | 112201 |
| 52         | p1       | (A)10        | 10   | 121227 | 121236 |
| 53         | p1       | (G)10        | 10   | 122197 | 122206 |
| 54         | p1       | (T)13        | 13   | 122724 | 122736 |
| 55         | p1       | (T)14        | 14   | 126309 | 126322 |
| 56         | p6       | (TTTCTA)6    | 36   | 127204 | 127239 |
| 57         | p4       | (GGCT)3      | 12   | 129078 | 129089 |
| 58         | p4       | (GAAA)3      | 12   | 129768 | 129779 |

**Table S3. (continued)**

|     |    |                |    |        |        |
|-----|----|----------------|----|--------|--------|
| 59  | p1 | (A)10          | 10 | 130021 | 130030 |
| 60  | p5 | (TGGT)3        | 15 | 132922 | 132936 |
| 61  | p5 | (CCTCT)3       | 15 | 137178 | 137192 |
| 62  | p2 | (TC)5          | 10 | 139250 | 139259 |
| 63  | p4 | (TATC)3        | 12 | 149305 | 149316 |
| 64  | p4 | (ATAA)3        | 12 | 153101 | 153112 |
| 65  | p1 | (A)10          | 10 | 153360 | 153369 |
| 66  | p5 | (ACAAA)3       | 15 | 153591 | 153605 |
| 67  | p4 | (GATA)3        | 12 | 154157 | 154168 |
| 68  | p1 | (T)10          | 10 | 154578 | 154587 |
| 69  | p4 | (AATC)3        | 12 | 159205 | 159216 |
| 70  | p4 | (GCCT)3        | 12 | 159599 | 159610 |
| 71  | p4 | (GGTA)3        | 12 | 164153 | 164164 |
| 72  | p2 | (TA)9          | 18 | 164779 | 164796 |
| 73  | p4 | (AGAA)3        | 12 | 164975 | 164986 |
| 74  | p4 | (GATT)3        | 12 | 170366 | 170377 |
| 75  | p1 | (A)13          | 13 | 170673 | 170685 |
| 76  | p5 | (GCGTA)3       | 15 | 175418 | 175432 |
| 77  | p5 | (AGCGA)3       | 15 | 175437 | 175451 |
| 78  | p3 | (AAC)4         | 12 | 175702 | 175713 |
| 79  | p2 | (TC)5          | 10 | 177576 | 177585 |
| 80  | p4 | (TAAT)3        | 12 | 177661 | 177672 |
| 81  | p3 | (AAG)6         | 18 | 179753 | 179770 |
| 82  | p4 | (TTAT)3        | 12 | 181362 | 181373 |
| 83  | p1 | (A)12          | 12 | 181463 | 181474 |
| 84  | p1 | (C)11          | 11 | 183465 | 183475 |
| 85  | p4 | (CAGC)3        | 12 | 185557 | 185568 |
| 86  | p2 | (CT)5          | 10 | 188771 | 188780 |
| 87  | c  | (T)11(G)10     | 21 | 193656 | 193676 |
| 88  | p2 | (AG)7          | 14 | 195622 | 195635 |
| 89  | p2 | (TG)5          | 10 | 196829 | 196838 |
| 90  | p3 | (CTC)5         | 15 | 202014 | 202028 |
| 91  | p6 | (AGAAAT)3      | 18 | 202393 | 202410 |
| 92  | p2 | (AT)5          | 10 | 202460 | 202469 |
| 93  | p2 | (CT)5          | 10 | 209274 | 209283 |
| 94  | p5 | (CCAAC)3       | 15 | 214712 | 214726 |
| 95  | p3 | (CTT)4         | 12 | 216983 | 216994 |
| 96  | p1 | (A)15          | 15 | 217263 | 217277 |
| 97  | p4 | (GGGA)3        | 12 | 219175 | 219186 |
| 98  | p3 | (ATG)4         | 12 | 220136 | 220147 |
| 99  | p1 | (T)16          | 16 | 224677 | 224692 |
| 100 | p4 | (AACA)3        | 12 | 225071 | 225082 |
| 101 | p4 | (AAAG)3        | 12 | 240213 | 240224 |
| 102 | p4 | (ATCT)3        | 12 | 242644 | 242655 |
| 103 | p4 | (ACTG)3        | 12 | 247120 | 247131 |
| 104 | p4 | (GACC)3        | 12 | 247677 | 247688 |
| 105 | c  | (AT)5(AAATAA)3 | 28 | 270952 | 270979 |
| 106 | p4 | (CGGC)3        | 12 | 271357 | 271368 |
| 107 | p4 | (ACAA)3        | 12 | 275595 | 275606 |
| 108 | p5 | (CGCTT)3       | 15 | 277934 | 277948 |
| 109 | p2 | (CT)5          | 10 | 278343 | 278352 |
| 110 | p4 | (CTTG)3        | 12 | 278901 | 278912 |
| 111 | p2 | (GA)5          | 10 | 282035 | 282044 |
| 112 | p2 | (CA)5          | 10 | 282417 | 282426 |
| 113 | p4 | (TAGC)3        | 12 | 282863 | 282874 |
| 114 | p4 | (TATC)3        | 12 | 283950 | 283961 |
| 115 | p5 | (CTATA)3       | 15 | 288367 | 288381 |
| 116 | p4 | (GGAA)3        | 12 | 289313 | 289324 |
| 117 | p5 | (GCGTA)3       | 15 | 295485 | 295499 |
| 118 | p5 | (AGCGA)3       | 15 | 295504 | 295518 |
| 119 | p3 | (AAC)4         | 12 | 295769 | 295780 |

**Table S3. (continued)**

|     |    |           |    |        |        |
|-----|----|-----------|----|--------|--------|
| 120 | p2 | (TC)5     | 10 | 297641 | 297650 |
| 121 | p4 | (TAAT)3   | 12 | 297726 | 297737 |
| 122 | p4 | (GGCG)3   | 12 | 300659 | 300670 |
| 123 | p4 | (GAAA)3   | 12 | 300961 | 300972 |
| 124 | p4 | (CTTC)3   | 12 | 305472 | 305483 |
| 125 | p5 | (TCCTT)3  | 15 | 305723 | 305737 |
| 126 | p4 | (CTTC)3   | 12 | 305778 | 305789 |
| 127 | p4 | (TAGT)3   | 12 | 306940 | 306951 |
| 128 | p4 | (TGTT)3   | 12 | 309065 | 309076 |
| 129 | p5 | (CAGTC)3  | 15 | 312580 | 312594 |
| 130 | p2 | (AG)5     | 10 | 313039 | 313048 |
| 131 | p3 | (CGC)4    | 12 | 318141 | 318152 |
| 132 | p4 | (GTTC)3   | 12 | 320819 | 320830 |
| 133 | p1 | (G)11     | 11 | 322854 | 322864 |
| 134 | p1 | (T)11     | 11 | 324730 | 324740 |
| 135 | p5 | (CATGG)3  | 15 | 330030 | 330044 |
| 136 | p4 | (TTTA)3   | 12 | 336196 | 336207 |
| 137 | p4 | (TCAG)4   | 16 | 342373 | 342388 |
| 138 | p4 | (TTCC)3   | 12 | 342400 | 342411 |
| 139 | p4 | (GACT)3   | 12 | 345847 | 345858 |
| 140 | p4 | (TTCT)3   | 12 | 351317 | 351328 |
| 141 | p5 | (TATAC)4  | 20 | 353793 | 353812 |
| 142 | p4 | (AAAG)5   | 20 | 354767 | 354786 |
| 143 | p4 | (TTTC)3   | 12 | 357135 | 357146 |
| 144 | p2 | (AG)5     | 10 | 368743 | 368752 |
| 145 | p2 | (TA)6     | 12 | 369498 | 369509 |
| 146 | p4 | (GTTT)4   | 16 | 369886 | 369901 |
| 147 | p5 | (ATAAG)3  | 15 | 370603 | 370617 |
| 148 | p4 | (GGAT)3   | 12 | 372541 | 372552 |
| 149 | p4 | (ATAC)3   | 12 | 372595 | 372606 |
| 150 | p4 | (AATG)3   | 12 | 374944 | 374955 |
| 151 | p3 | (CTC)5    | 15 | 381750 | 381764 |
| 152 | p3 | (TGC)4    | 12 | 383427 | 383438 |
| 153 | p4 | (AAAG)3   | 12 | 386627 | 386638 |
| 154 | p5 | (TTCCT)3  | 15 | 388165 | 388179 |
| 155 | p2 | (TC)6     | 12 | 391666 | 391677 |
| 156 | p1 | (G)14     | 14 | 396079 | 396092 |
| 157 | p4 | (GATT)3   | 12 | 397050 | 397061 |
| 158 | p1 | (T)17     | 17 | 409052 | 409068 |
| 159 | p5 | (TCTAC)3  | 15 | 410926 | 410940 |
| 160 | p4 | (TCTA)5   | 20 | 411210 | 411229 |
| 161 | p5 | (CTTTG)3  | 15 | 412972 | 412986 |
| 162 | p2 | (AG)6     | 12 | 419112 | 419123 |
| 163 | p4 | (CTTA)3   | 12 | 425024 | 425035 |
| 164 | p1 | (A)10     | 10 | 429414 | 429423 |
| 165 | p2 | (AT)6     | 12 | 431699 | 431710 |
| 166 | p4 | (GCCC)3   | 12 | 438917 | 438928 |
| 167 | p4 | (GGAA)3   | 12 | 440601 | 440612 |
| 168 | p1 | (T)10     | 10 | 449121 | 449130 |
| 169 | p5 | (TACTA)4  | 20 | 449470 | 449489 |
| 170 | p4 | (CCTT)3   | 12 | 451100 | 451111 |
| 171 | p1 | (G)11     | 11 | 454531 | 454541 |
| 172 | p6 | (ATCTAT)3 | 18 | 457210 | 457227 |
| 173 | p4 | (TCAT)3   | 12 | 457389 | 457400 |
| 174 | p4 | (TTCT)3   | 12 | 457574 | 457585 |
| 175 | p1 | (T)10     | 10 | 459544 | 459553 |
| 176 | p1 | (T)10     | 10 | 470235 | 470244 |
| 177 | p4 | (AGAT)3   | 12 | 471353 | 471364 |
| 178 | p4 | (AATA)4   | 16 | 471474 | 471489 |
| 179 | p3 | (ATT)5    | 15 | 471902 | 471916 |
| 180 | p1 | (A)12     | 12 | 472200 | 472211 |

**Table S3. (continued)**

|     |    |          |    |        |        |
|-----|----|----------|----|--------|--------|
| 181 | p1 | (T)10    | 10 | 472654 | 472663 |
| 182 | p4 | (CCAG)3  | 12 | 474591 | 474602 |
| 183 | p2 | (AG)5    | 10 | 475173 | 475182 |
| 184 | p1 | (G)12    | 12 | 475799 | 475810 |
| 185 | p2 | (TC)8    | 16 | 477336 | 477351 |
| 186 | p2 | (AG)7    | 14 | 477367 | 477380 |
| 187 | p3 | (GCA)4   | 12 | 478577 | 478588 |
| 188 | p3 | (TGT)4   | 12 | 479463 | 479474 |
| 189 | p4 | (GCAA)3  | 12 | 480237 | 480248 |
| 190 | p4 | (GCAG)3  | 12 | 489622 | 489633 |
| 191 | p1 | (G)11    | 11 | 489980 | 489990 |
| 192 | p2 | (AG)5    | 10 | 492660 | 492669 |
| 193 | p3 | (GAA)4   | 12 | 493663 | 493674 |
| 194 | p3 | (TGA)4   | 12 | 493719 | 493730 |
| 195 | p1 | (G)14    | 14 | 495210 | 495223 |
| 196 | p1 | (A)12    | 12 | 501527 | 501538 |
| 197 | p3 | (TAA)4   | 12 | 508454 | 508465 |
| 198 | p5 | (GTAAT)3 | 15 | 509392 | 509406 |
| 199 | p2 | (AC)6    | 12 | 510101 | 510112 |
| 200 | p4 | (TCGC)3  | 12 | 515551 | 515562 |
| 201 | p4 | (TTCT)3  | 12 | 523789 | 523800 |

---

**Table S4.** Relative synonymous codon usage for the protein-coding mitochondrial genes of *Nelumbo nucifera*.

| Codon         | Count <sup>1</sup> | RSCU <sup>2</sup> | Codon  | Count | RSCU | Codon                     | Count | RSCU | Codon                     | Count | RSCU |
|---------------|--------------------|-------------------|--------|-------|------|---------------------------|-------|------|---------------------------|-------|------|
| <b>UUU(F)</b> | 362                | 1.08              | UCU(S) | 245   | 1.37 | UAU(Y)                    | 248   | 1.52 | UGU(C)                    | 102   | 1.28 |
| <b>UUC(F)</b> | 307                | 0.92              | UCC(S) | 184   | 1.03 | UAC(Y)                    | 78    | 0.48 | UGC(C)                    | 57    | 0.72 |
| <b>UUA(L)</b> | 239                | 1.32              | UCA(S) | 203   | 1.14 | <b>UAA(*)<sup>3</sup></b> | 19    | 1.58 | <b>UGA(*)<sup>3</sup></b> | 11    | 0.92 |
| <b>UUG(L)</b> | 231                | 1.28              | UCG(S) | 160   | 0.9  | <b>UAG(*)<sup>3</sup></b> | 6     | 0.5  | UGG(W)                    | 155   | 1    |
| <b>CUU(L)</b> | 227                | 1.25              | CCU(P) | 239   | 1.4  | CAU(H)                    | 224   | 1.53 | CGU(R)                    | 163   | 1.2  |
| <b>CUC(L)</b> | 118                | 0.65              | CCC(P) | 135   | 0.79 | CAC(H)                    | 69    | 0.47 | CGC(R)                    | 85    | 0.63 |
| <b>CUA(L)</b> | 167                | 0.92              | CCA(P) | 197   | 1.15 | CAA(Q)                    | 242   | 1.48 | CGA(R)                    | 180   | 1.33 |
| <b>CUG(L)</b> | 105                | 0.58              | CCG(P) | 112   | 0.66 | CAG(Q)                    | 84    | 0.52 | CGG(R)                    | 97    | 0.71 |
| <b>AUU(I)</b> | 374                | 1.3               | ACU(T) | 203   | 1.37 | AAU(N)                    | 239   | 1.3  | AGU(S)                    | 175   | 0.98 |
| <b>AUC(I)</b> | 251                | 0.88              | ACC(T) | 156   | 1.05 | AAC(N)                    | 129   | 0.7  | AGC(S)                    | 105   | 0.59 |
| <b>AUA(I)</b> | 235                | 0.82              | ACA(T) | 139   | 0.94 | AAA(K)                    | 292   | 1.17 | AGA(R)                    | 195   | 1.44 |
| <b>AUG(M)</b> | 292                | 1                 | ACG(T) | 94    | 0.64 | AAG(K)                    | 208   | 0.83 | AGG(R)                    | 94    | 0.69 |
| <b>GUU(V)</b> | 199                | 1.16              | GCU(A) | 280   | 1.58 | GAU(D)                    | 259   | 1.4  | GGU(G)                    | 243   | 1.25 |
| <b>GUC(V)</b> | 129                | 0.75              | GCC(A) | 162   | 0.91 | GAC(D)                    | 110   | 0.6  | GGC(G)                    | 98    | 0.51 |
| <b>GUA(V)</b> | 199                | 1.16              | GCA(A) | 177   | 1    | GAA(E)                    | 314   | 1.35 | GGA(G)                    | 292   | 1.51 |
| <b>GUG(V)</b> | 158                | 0.92              | GCG(A) | 90    | 0.51 | GAG(E)                    | 150   | 0.65 | GGG(G)                    | 142   | 0.73 |

<sup>1</sup> Count means the numbers of codons used among the protein-coding mitochondrial genes

<sup>2</sup> RSCU represents the relative synonymous codon usage

<sup>3</sup> The codons in bold with asterisks represent stop codons



**Table S5** Collinearity analysis to identify conserved gene clusters among the 38 species.

| Gene clusters | Monocots       |              |         |       |         |           |            |          |          |         |           |       |             |           |       |        |      | Dicots   |        |           |          |           |        |          |            |       |       |          |            |           |          |        |         |        |        |           |       |       |    |
|---------------|----------------|--------------|---------|-------|---------|-----------|------------|----------|----------|---------|-----------|-------|-------------|-----------|-------|--------|------|----------|--------|-----------|----------|-----------|--------|----------|------------|-------|-------|----------|------------|-----------|----------|--------|---------|--------|--------|-----------|-------|-------|----|
|               | Nelumbo        | Liriodendron | Phoenix | Oryza | Sorghum | Tripsacum | Zea        | Aegilops | Triticum | Butomus | Spirodela | Ajuga | Arabidopsis | Asclepias | Batis | Beta   | Boea | Brassica | Carica | Citrullus | Cucumis  | Cucurbita | Daucus | Glycine  | Helianthus | Lotus | Malus | Milletia | Mimulus    | Nicotiana | Raphanus | Rhazya | Ricinus | Salvia | Silene | Vaccinium | Vigna | Vitis |    |
| 1             | rNAS18-1       | -            | -       | 88.5  | 30      | 54        | -          | 13.40    | 6.18     | 26      | 37        | 129   | -           | -         | -     | -      | 42   | 33       | 34.8   | 40        | 43       | 80        | -      | -        | -          | -     | 63    | 41       | -          | -         | -        | -      | 45      | -      | -      | -         | 17    | 45    |    |
|               | rNAS18-4       | -            | -       | -     | -       | -         | -          | -        | -        | 27      | 38        | 128   | -           | -         | -     | 3      | 41   | -        | 82     | 33        | -        | 12        | -      | -        | -          | 31    | -     | -        | 61         | 43        | -        | -      | -       | -      | -      | -         | -     | 46    |    |
|               | rRNA26-2       | -            | -       | 80    | 28      | 45        | -          | 71.2     | 1        | -       | -         | 3     | 60          | 79        | 61    | -      | -    | -        | -      | -         | 30.41    | 4         | -      | 54       | -          | 35    | 30    | 35       | 29.1       | -         | 21       | 5      | -       | -      | 34     | 23        | -     |       |    |
|               | nad6           | 28           | 13      | 17    | -       | 12        | 213        | 18       | -        | -       | -         | 44    | 28          | -         | -     | 65     | -    | -        | -      | 10        | 12       | 27        | -      | -        | -          | 40    | -     | -        | -          | 50        | 27       | 59     | -       | 9      | -      | 30        | -     |       |    |
|               | rRNA18_b-2     | -            | -       | -     | -       | -         | -          | -        | -        | -       | -         | -     | -           | -         | -     | -      | -    | -        | -      | -         | -        | -         | -      | -        | -          | -     | -     | -        | -          | -         | -        | -      | -       | -      | -      | -         | -     | -     |    |
| 2             | trnD (GTC)_ψ-2 | -            | -       | -     | -       | -         | -          | -        | -        | -       | -         | -     | -           | -         | -     | -      | -    | -        | -      | -         | -        | -         | -      | -        | -          | -     | -     | -        | -          | -         | -        | -      | -       | -      | -      | -         | -     |       |    |
|               | ccmFN-2        | -            | -       | 66    | 21      | 29        | -          | 38.3     | 16       | -       | 2         | 38    | -           | 73        | 17    | 12     | 23   | 61       | 34     | 15        | 21       | -         | 63,107 | -        | 52,15      | 13    | 9     | 64       | 52         | 6         | 1        | -      | -       | 12     | 7      | 40        | 23    | -     |    |
|               | nad1_exon4,5   | 10           | 12      | 2     | 1       | 8         | 21         | 17       | 4        | 5       | 22        | 2     | 53          | -         | 16    | 5      | 5    | 38       | 2      | 24        | 4        | 9         | 16     | -        | 2          | 16    | 5     | 5        | 60.4       | 12        | 24       | 1      | 1       | 33     | 43     | 3         | 3     |       |    |
|               | matR           | -            | 35      | 64    | -       | 31        | -          | 36       | 14       | 6       | -         | 33    | 54          | -         | 17    | 109    | 61   | 39       | 5      | 33        | -        | 27        | 17     | 93       | -          | 5     | 35    | -        | 13         | -         | 13       | 23     | 22      | 5      | 24     | -         | -     | -     |    |
|               | nad4L          | 14           | 19      | 61    | 40      | 38        | -          | 30       | 70       | -       | 34        | 31    | 67.7        | 68        | 30    | -      | 16   | 28       | -      | 61        | 61       | 22        | 77     | 57       | 6          | 17    | -     | 16       | 47         | -         | -        | 3      | 30      | -      | 47     | 12        | -     | 59    |    |
| 3             | atp4           | 15           | 18      | 4     | 45      | 15        | 64         | 64       | 35       | 46      | 35        | 30    | 67          | 49        | -     | 27     | -    | -        | -      | 60        | 14       | 23        | -      | 22       | -          | 16    | 61    | 17       | 46         | -         | -        | 2      | 31      | -      | 46     | 13        | -     | 60    |    |
|               | ccmC           | 68           | -       | 20    | 27      | 7         | 84         | 42       | 29       | 37,11   | 39        | 22    | 92          | 18        | 44    | 22     | 23   | 99       | 7      | 69        | 43       | 24        | -      | 2        | 44         | 53    | 11    | 45       | 13         | 32        | -        | 10     | -       | -      | -      | 37        | 69    |       |    |
|               | sdh3-b         | 26           | -       | -     | -       | -         | -          | -        | -        | -       | -         | -     | -           | 8         | -     | -      | -    | -        | -      | 12        | 40,7     | -         | 26     | -        | -          | 22    | -     | 59       | 30,182,133 | -         | -        | -      | -       | -      | -      | -         | 36    |       |    |
|               | nad1_exon2,3   | 10           | 12      | 2     | 1       | 8         | 21         | 17       | 4        | 5       | 22        | 2     | 53          | -         | 80    | 5      | 38   | 2        | 24     | 4         | 9        | 16        | -      | -        | 2          | 16    | 5     | 5        | 60.4       | 12        | 19       | 1      | 1       | 23     | 43     | 3         | 3     |       |    |
|               | rps13          | -            | -       | 5     | 16      | 9         | -          | 21       | 6        | -       | -         | 24    | -           | 61,29     | 1     | -      | -    | -        | 16     | 55        | 46       | 10        | 32     | -        | -          | 62    | -     | 39       | 33         | 61        | -        | 70     | 33      | 89     | -      | 9         | 83    |       |    |
| 4             | cox2           | 32           | 31      | 45    | 47      | 33        | 207        | 8        | 42       | -       | 59        | 17    | 120,17      | 36        | 65    | 80,106 | -    | 44,97    | 3      | 23        | 58       | 14        | -      | 97,97    | -          | 64    | 59    | 19       | 20         | 70        | -        | 44     | 50      | -      | 44     | -         | -     |       |    |
|               | rps4           | 70           | 27      | 51    | -       | 32        | 8          | 19       | 48       | -       | 43        | -     | 30          | 51        | 4,12  | 88     | -    | 11       | 11     | -         | 43       | -         | 38     | 64       | -          | 32    | -     | 47       | 49         | -         | 43       | 26     | 60      | 88     | -      | 17        | 34    |       |    |
|               | rps7           | -            | -       | 12    | 24      | -         | -          | 48       | 62       | 14      | -         | -     | 119         | 3         | 5     | 104,4  | -    | 32       | 15     | 48        | 9        | -         | 39     | -        | -          | 63    | -     | -        | 15         | 22        | -        | 22     | -       | 89     | -      | -         | 43    |       |    |
|               | atp1_ψ         | 7            | 21      | 42    | 2       | 35,13     | 190        | 3        | -        | 15      | 51        | -     | 116         | 17        | -     | -      | -    | -        | -      | -         | 52       | 20        | 37,19  | 99,48,68 | -          | 33    | 25    | 12       | 4          | -         | 38       | -      | 56      | 10     | 29     | 45        | -     | -     |    |
|               | rRNA18_ψ-1     | 62           | -       | 58    | 30      | -         | 184        | -        | 66,18    | 39      | 37        | -     | -           | -         | 21    | -      | 42   | 27       | 53     | 8         | 40       | 13        | 80     | -        | 21         | -     | 43    | 63       | 41         | 33        | -        | 3      | -       | 42     | -      | -         | 17    | 45    |    |
| 5             | atp6           | 31           | 2       | 48    | 48      | 26        | -          | 22       | 21       | 21      | 40        | 1     | 115         | 47        | 75    | 96     | 6    | 25       | -      | 6         | 49       | 18        | 5      | 101,27   | 43         | 21    | 49    | 51       | 34,22      | -         | 8        | 76     | 43      | -      | -      | -         | -     | 31    | 47 |
|               | rps2           | -            | 26      | -     | 10      | -         | 182        | 6        | 40       | -       | 49        | -     | -           | -         | -     | -      | -    | -        | -      | -         | -        | -         | -      | -        | -          | -     | -     | -        | -          | -         | -        | -      | -       | -      | -      | -         | -     |       |    |
|               | trnL(CAA)_ψ    | -            | -       | -     | -       | -         | -          | -        | -        | -       | -         | -     | -           | -         | -     | -      | -    | -        | -      | -         | -        | -         | -      | -        | -          | -     | -     | -        | -          | -         | -        | -      | -       | -      | -      | -         | -     |       |    |
|               | ccmFC          | 50           | 20      | 67    | -       | 21        | 36         | -        | 25       | 25      | 48        | 32    | -           | 37,60     | 31    | 18     | 51   | 48       | 4      | 44        | 3        | 32        | 29     | 26       | -          | 37    | 1     | -        | 42         | 139       | 27       | 65     | 21      | 95     | 31     | -         | 7     | 30    |    |
|               | cox1           | 41           | 8       | 72    | 37      | -         | 159        | 46       | 44       | -       | 1         | -     | -           | 25        | 32    | 108    | 66   | 83       | 24     | 1         | 2        | 2         | 80     | 24       | 19         | 1     | 4     | 2        | 40         | 53        | -        | 60     | 18      | 119    | 1      | 2         | -     | 40    |    |
| 6             | rps10          | 2            | -       | -     | -       | -         | -          | -        | -        | -       | -         | -     | -           | 72        | 33    | -      | -    | -        | -      | 65        | -        | 55        | -      | 23       | -          | 65    | -     | 18       | 41         | 54        | -        | 60     | 17      | 51     | -      | 10        | 52    | 94    |    |
|               | rps19-2        | 66           | -       | 60    | -       | -         | -          | 29       | 71       | -       | -         | -     | -           | 52        | 24    | -      | -    | -        | 6      | 3         | -        | 54        | -      | -        | -          | -     | -     | 67       | -          | -         | 81       | 39     | -       | -      | 11     | -         | -     |       |    |
|               | rps1           | 12           | 23      | 65    | 20      | 30        | -          | 37       | 15,1     | 38      | 6         | -     | -           | 30        | 64    | -      | -    | -        | 60     | -         | 53       | -         | 45,90  | 65       | -          | -     | 27    | 70       | -          | 60        | 83       | -      | 80      | 55     | -      | -         | 15    | 98    |    |
|               | mtb_ψ          | -            | -       | -     | -       | -         | -          | -        | -        | -       | -         | -     | -           | -         | -     | -      | -    | -        | -      | -         | -        | -         | -      | -        | -          | -     | -     | -        | -          | -         | -        | -      | -       | -      | -      | -         | -     |       |    |
|               | nad5_exon4,5   | 34           | 32      | -     | 18      | 43        | 87         | 15       | -        | 3       | 13        | -     | 7           | 11        | 41    | -      | -    | 21,60,21 | 9      | 43        | 1        | 5         | 1      | 66       | 20         | -     | 7     | 23       | 6          | -         | 4        | 73     | 2       | 15     | 11     | 1         | 1     | 1     |    |
| 7             | trnE(TTC)      | 35           | -       | 79    | 39      | 27        | 19         | 63       | -        | 30,36   | -         | 16    | -           | 39        | 55    | 41     | 26   | -        | 51     | -         | 59       | 15        | -      | -        | -          | 42    | -     | 58       | 56         | 150       | -        | 40     | 30      | 58     | -      | 33        | 53    | 9     | 52 |
|               | nad7           | 36           | 9       | 27    | 23      | 34        | 101        | 31       | 69       | -       | 14        | 3     | 52          | -         | 14    | 100    | 64   | 1        | 21     | 56        | 20       | 17        | 55     | 47       | -          | 4     | -     | 69       | -          | 165       | -        | 6      | 16      | -      | 37     | 56        | 46    | 24,48 |    |
|               | nad5_exon1,2   | 34           | 32      | -     | 18      | 43        | 87         | 15       | -        | 3       | 13        | -     | 7           | 11        | 15    | -      | -    | 21,60,21 | 9      | 43        | 1        | 5         | 1      | 66       | 20         | -     | 7     | 23       | 6          | -         | 4        | 18     | 2       | 15     | 11     | 1         | 1     | 1     |    |
|               | atp9           | 22           | 22      | 55    | 51      | 40        | -          | -        | 3        | -       | 32        | 7     | 110         | 6,31      | 6     | 30     | 31   | -        | 59     | 58        | 82       | 48        | 19     | 11       | -          | -     | -     | 12       | -          | 62        | 31,16    | 19     | 19      | 143    | 25     | 26        | 14,45 | -     |    |
|               | trnG(GCC)      | -            | -       | -     | -       | -         | -          | -        | -        | -       | -         | -     | -           | 77        | -     | -      | -    | -        | -      | -         | -        | -         | -      | -        | -          | -     | -     | -        | -          | -         | 61       | -      | -       | -      | -      | -         | -     |       |    |
| 8             | nad9           | 46           | 40      | -     | 20      | 40        | 5          | 38       | 9        | -       | 8         | 13    | 29          | -         | -     | 22     | 54   | 41       | 54     | 52        | -        | 76        | 41     | 44       | 45         | 29    | 37    | 153      | 5          | 64,78     | 15       | 21     | 7       | -      | -      | 32        | 67    |       |    |
|               | ccmFN-1        | 43           | 29      | 66    | 21      | 29        | -          | 3,38     | 16       | 43      | 2         | 38    | 85,98       | 66        | 73    | -      | 50   | 58,23    | 31     | 34        | 15       | 21        | 36     | 107,63   | -          | 52    | 13    | 9        | 64         | 52        | 30,6     | 1      | -       | 155    | 12     | 7         | 40    | -     |    |
|               | trnD(GTC)_ψ-1  | -            | -       | 30    | -       | -         | -          | -        | -        | -       | -         | -     | -           | -         | -     | -      | -    | -        | -      | -         | -        | 40        | 13     | 80       | -          | -     | -     | 30       | 43         | 67        | 63       | 41     | 33      | 84     | 3      | 45        | -     | 17    |    |
|               | rRNA18-2       | 62           | -       | -     | -       | -         | -          | 68,50,40 | 18,53,66 | 26      | -         | -     | -           | -         | -     | -      | -    | -        | -      | -         | -        | 42,42     | 27     | -        | 34         | 40    | 13    | 80       | -          | -         | -        | -      | -       | -      | -      | -         | -     | -     |    |
|               | rRNA5-2        | -            | -       | -     | -       | -         | -          | -        | -        | -       | -         | -     | -           | -         | -     | -      | -    | -        | -      | -         | -        | -         | -      | -        | -          | -     | -     | -        | -          | -         | -        | -      | -       | -      | -      | -         | -     | -     |    |
| 9             | rRNA26-1       | 29           | -       | 80    | 28      | 45        | -          | -        | -        | 23      | 45        | -     | 3           | 64        | 79    | 61,98  | 49   | 65       | 57     | 29        | 41,30,41 | 4         | 98     | 54       | 23         | -     | -     | 52,30    | 35         | 1         | -        | 37     | 21      | 5      | 32     | 36        | 34    | 23    |    |
|               | nad2_exon1,2   | 1            | -       | 85    | 34      | 16        | 141,47,23  | -        | -        | 1       | 3         | 12    | 7,1         | 1         | 45    | 32     | 7    | -        | -      | -         | 17       | 29        | 1      | 38       | -          | -     | -     | 23       | 1          | 6         | 92,120   | 44     | 14      | 26     | 58     | 16        | -     | 13    | 28 |
|               | rps12          | 38           | 43      | 80    | 9       | 30        | 139,108,27 | 39       | 38</     |         |           |       |             |           |       |        |      |          |        |           |          |           |        |          |            |       |       |          |            |           |          |        |         |        |        |           |       |       |    |

**Table S6.** RNA editing data obtained from 40 protein-coding genes and one pseudogene in the *Nelumbo nucifera* mitochondrial genome.

| Gene         | CDS length(bp) | Total edits | Edits/100 nt | Nonsyn <sup>a</sup> | Syn <sup>b</sup> |
|--------------|----------------|-------------|--------------|---------------------|------------------|
| <i>atp1</i>  | 1530           | 13          | 0.850        | 12                  | 1                |
| <i>atp4</i>  | 597            | 15          | 2.513        | 14                  | 1                |
| <i>atp6</i>  | 774            | 27          | 3.488        | 25                  | 2                |
| <i>atp8</i>  | 480            | 7           | 1.458        | 5                   | 2                |
| <i>atp9</i>  | 225            | 16          | 7.111        | 12                  | 4                |
| <i>ccmB</i>  | 621            | 43          | 6.924        | 40                  | 3                |
| <i>ccmC</i>  | 759            | 0           | 0.000        | 0                   | 0                |
| <i>ccmFC</i> | 1356           | 0           | 0.000        | 0                   | 0                |
| <i>ccmFN</i> | 1734           | 40          | 2.307        | 36                  | 4                |
| <i>cob</i>   | 1182           | 21          | 1.777        | 20                  | 1                |
| <i>cox1</i>  | 1584           | 15          | 0.947        | 13                  | 2                |
| <i>cox2</i>  | 783            | 24          | 3.065        | 21                  | 3                |
| <i>cox3</i>  | 798            | 20          | 2.506        | 20                  | 0                |
| <i>matR</i>  | 1968           | 19          | 0.965        | 18                  | 1                |
| <i>mttBψ</i> | 842            | 30          | 3.563        | ND <sup>c</sup>     | ND <sup>c</sup>  |
| <i>nad1</i>  | 978            | 39          | 3.988        | 34                  | 5                |
| <i>nad2</i>  | 1467           | 45          | 3.067        | 39                  | 6                |
| <i>nad3</i>  | 357            | 16          | 4.482        | 16                  | 0                |
| <i>nad4</i>  | 1488           | 68          | 4.570        | 65                  | 3                |
| <i>nad4L</i> | 303            | 13          | 4.290        | 13                  | 0                |
| <i>nad5</i>  | 2013           | 45          | 2.235        | 43                  | 2                |
| <i>nad6</i>  | 633            | 11          | 1.738        | 10                  | 1                |
| <i>nad7</i>  | 1185           | 40          | 3.376        | 38                  | 2                |
| <i>nad9</i>  | 573            | 16          | 2.792        | 16                  | 0                |
| <i>rpl16</i> | 516            | 12          | 2.326        | 8                   | 4                |
| <i>rpl2</i>  | 996            | 3           | 0.301        | 2                   | 1                |
| <i>rpl5</i>  | 561            | 12          | 2.139        | 12                  | 0                |
| <i>rps1</i>  | 606            | 7           | 1.155        | 7                   | 0                |
| <i>rps10</i> | 363            | 6           | 1.653        | 5                   | 1                |
| <i>rps11</i> | 444            | 5           | 1.126        | 4                   | 1                |
| <i>rps12</i> | 378            | 0           | 0.000        | 0                   | 0                |
| <i>rps13</i> | 351            | 6           | 1.709        | 6                   | 0                |
| <i>rps14</i> | 303            | 2           | 0.660        | 2                   | 0                |
| <i>rps19</i> | 285            | 5           | 1.754        | 4                   | 1                |
| <i>rps2</i>  | 663            | 10          | 1.508        | 9                   | 1                |
| <i>rps3</i>  | 1692           | 17          | 1.005        | 14                  | 3                |
| <i>rps4</i>  | 1059           | 25          | 2.361        | 23                  | 2                |
| <i>rps7</i>  | 447            | 3           | 0.671        | 3                   | 0                |
| <i>sdh3</i>  | 375            | 3           | 0.800        | 2                   | 1                |
| <i>sdh4</i>  | 450            | 1           | 0.222        | 1                   | 0                |
| Total        | 33719          | 700         | 2.076        | 612                 | 58               |

<sup>a</sup> Nonsynonymous edits;

<sup>b</sup> Synonymous edits;

<sup>c</sup> No data available, because *mttBψ* is a pseudogene;

**Table S7.** RNA editing sites of *Amborella trichopoda*, *Liriodendron tulipifera*, *Nelumbo nucifera*, *Oryza sativa* and *Vitis vinifera*.

| gene         | Amborella       | Liriodendron | Nelumbo         | Vitis | Oryza |
|--------------|-----------------|--------------|-----------------|-------|-------|
| <i>atp1</i>  | 11              | 14           | 13              | 8     | 5     |
| <i>atp4</i>  | 12              | 16           | 15              | 5     | 9     |
| <i>atp6</i>  | 23              | 29           | 27              | 21    | 16    |
| <i>atp8</i>  | 7               | 6            | 7               | 8     | 4     |
| <i>atp9</i>  | ND <sup>a</sup> | 15           | 16              | 4     | 8     |
| <i>ccmB</i>  | 49              | 49           | 43              | 6     | 35    |
| <i>ccmC</i>  | 41              | 41           | 0               | 18    | 35    |
| <i>ccmFC</i> | 37              | 24           | 0 <sup>b</sup>  | 7     | 27    |
| <i>ccmFN</i> | 47              | 34           | 40              | 13    | 31    |
| <i>cob</i>   | 26              | 30           | 21              | 25    | 19    |
| <i>cox1</i>  | 33              | 37           | 15              | 22    | 4     |
| <i>cox2</i>  | 21              | 14           | 24              | 21    | 19    |
| <i>cox3</i>  | 21              | 19           | 20              | 10    | 1     |
| <i>matR</i>  | 25              | 19           | 19              | 11    | ND    |
| <i>mttB</i>  | 53              | 58           | 30 <sup>c</sup> | ND    | 33    |
| <i>nad1</i>  | 37              | 33           | 39              | 12    | 23    |
| <i>nad2</i>  | 41              | 49           | 45              | 19    | 30    |
| <i>nad3</i>  | 19              | 21           | 16              | 5     | 15    |
| <i>nad4</i>  | 68              | 58           | 68              | 21    | 20    |
| <i>nad4L</i> | 13              | 13           | 13              | 8     | 10    |
| <i>nad5</i>  | 55              | 48           | 45              | 21    | 11    |
| <i>nad6</i>  | 20              | 25           | 11              | 9     | 18    |
| <i>nad7</i>  | 40              | 39           | 40              | 22    | 32    |
| <i>nad9</i>  | 16              | 14           | 16              | 8     | 12    |
| <i>rpl16</i> | 8               | 9            | 12              | 10    | 12    |
| <i>rpl2</i>  | 4               | 3            | 3               | 2     | 1     |
| <i>rpl5</i>  | 13              | 12           | 12              | 13    | 1     |
| <i>rps1</i>  | 3               | 5            | 7               | 7     | 3     |
| <i>rps10</i> | 3               | 6            | 6               | 7     | ND    |
| <i>rps11</i> | 5               | 8            | 5               | ND    | 4     |
| <i>rps12</i> | 9               | 9            | 0               | 9     | ND    |
| <i>rps13</i> | 5               | 7            | 6               | 6     | 8     |
| <i>rps14</i> | 2               | 2            | 2               | 3     | ND    |
| <i>rps19</i> | 4               | 5            | 5               | 8     | 6     |
| <i>rps2</i>  | ND              | ND           | 10              | ND    | 10    |
| <i>rps3</i>  | ND              | 17           | 17              | 10    | 10    |
| <i>rps4</i>  | 27              | ND           | 25              | 14    | 15    |
| <i>rps7</i>  | 3               | 4            | 3               | 3     | 2     |
| <i>sdh3</i>  | 10              | 10           | 3 <sup>d</sup>  | 1     | ND    |
| <i>sdh4</i>  | 7               | ND           | 1               | 6     | ND    |
| Total        | 818             | 802          | 700             | 403   | 489   |

<sup>a</sup> ND indicates no data available;

<sup>b</sup> The cDNA sequence of *ccmFC* mature mRNA was not acquired;

<sup>c</sup> *mttB* is a pseudogene in *Nelumbo Nucifera*;

<sup>d</sup> Indicates the edit information of either *sdh3a* or *sdh3b*;

**Table S8.** Positively selected sites in *Nelumbo nucifera* mitochondrial genes and parameter estimates in the branch-site model.

| Gene         | Parameters under null model                                   | Parameters under alternative model                                           | lnL0   | lnL1   | 2Δl     | d.f. | P-value   | Positively selected sites |
|--------------|---------------------------------------------------------------|------------------------------------------------------------------------------|--------|--------|---------|------|-----------|---------------------------|
| <i>atp1</i>  | P0 = 0.73411, ω0 = 0.04850, P1 = 0.10371, (P2a+P2b = 0.16219) | P0 = 0.73409, ω0 = 0.04850, P1 = 0.10371, ω2 = 1.00000, (P2a+P2b = 0.1622)   | 42287  | 42287  | 0       | 1    | 1         | 341 L 0.785               |
| <i>atp4</i>  | P0 = 0.58719, ω0 = 0.27211, P1 = 0.20703, (P2a+P2b = 0.20578) | P0 = 0.63816, ω0 = 0.27211, P1 = 0.22500, ω2 = 2.67083, (P2a+P2b = 0.13684)  | 105268 | 105269 | 2       | 1    | 0.1573    | none                      |
| <i>atp6</i>  | P0 = 0.84173, ω0 = 0.11281, P1 = 0.15827, (P2a+P2b = 0)       | P0 = 0.84173, ω0 = 0.11281, P1 = 0.15827, ω2 = 1.00000, (P2a+P2b = 0)        | 584570 | 584570 | 0       | 1    | 1         | none                      |
| <i>atp8</i>  | P0 = 0.49659, ω0 = 0.21112, P1 = 0.28227, (P2a+P2b = 0.22115) | P0 = 0.50674, ω0 = 0.21112, P1 = 0.28804, ω2 = 2.82118, (P2a+P2b = 0.20523)  | 196277 | 196280 | 6       | 1    | 0.01431   | none                      |
| <i>atp9</i>  | P0 = 0.33256, ω0 = 0.04649, P1 = 0.05655, (P2a+P2b = 0.61089) | P0 = 0.33255, ω0 = 0.04649, P1 = 0.05655, ω2 = 1.00000, (P2a+P2b = 0.6109)   | 283609 | 283609 | 0       | 1    | 1         | 27 L 0.910                |
| <i>ccmB</i>  | P0 = 0.41300, ω0 = 0.21071, P1 = 0.37844, (P2a+P2b = 0.20857) | P0 = 0.41715, ω0 = 0.21071, P1 = 0.38224, ω2 = 2.57537, (P2a+P2b = 0.20061)  | 705727 | 705732 | 10      | 1    | 0.001565  | none                      |
| <i>ccmC</i>  | P0 = 0.62823, ω0 = 0.15352, P1 = 0.37177, (P2a+P2b = 0)       | P0 = 0.62823, ω0 = 0.15352, P1 = 0.37177, ω2 = 1.00000, (P2a+P2b = 0)        | 89901  | 89901  | 0       | 1    | 1         | none                      |
| <i>ccmFC</i> | P0 = 0.00011, ω0 = 0.20196, P1 = 0.00011, (P2a+P2b = 0.99978) | P0 = 0.00003, ω0 = 0.20196, P1 = 0.00002, ω2 = 1.00000, (P2a+P2b = 0.99995)  | 630380 | 630379 | 2       | 1    | 0.1573    | 101 V 0.685;182 Y 0.601   |
| <i>ccmFN</i> | P0 = 0.47694, ω0 = 0.07410, P1 = 0.52306, (P2a+P2b = 0)       | P0 = 0.47694, ω0 = 0.07410, P1 = 0.52306, ω2 = 1.00000, (P2a+P2b = 0)        | 71409  | 71409  | 0       | 1    | 1         | none                      |
| <i>cob</i>   | P0 = 0.85629, ω0 = 0.08859, P1 = 0.09391, (P2a+P2b = 0.0498)  | P0 = 0.85650, ω0 = 0.08859, P1 = 0.09393, ω2 = 1.00000, (P2a+P2b = 0.04957)  | 499962 | 499961 | 2       | 1    | 0.1573    | none                      |
| <i>cox1</i>  | P0 = 0.86770, ω0 = 0.05271, P1 = 0.03245, (P2a+P2b = 0.09986) | P0 = 0.95686, ω0 = 0.05270, P1 = 0.03580, ω2 = 36.05381, (P2a+P2b = 0.00733) | 155053 | 710116 | 1110126 | 1    | 0         | 36 F 0.996**; 268 Y 0.778 |
| <i>cox2</i>  | P0 = 0.87395, ω0 = 0.08431, P1 = 0.07105, (P2a+P2b = 0.05499) | P0 = 0.91075, ω0 = 0.08428, P1 = 0.07367, ω2 = 5.22707, (P2a+P2b = 0.01558)  | 854782 | 835539 | 38486   | 1    | 0         | 117 H 0.681               |
| <i>cox3</i>  | P0 = 0.69291, ω0 = 0.06991, P1 = 0.15197, (P2a+P2b = 0.15512) | P0 = 0.71281, ω0 = 0.06991, P1 = 0.15634, ω2 = 3.39625, (P2a+P2b = 0.13085)  | 409672 | 409689 | 34      | 1    | 5.511E-09 | none                      |

**Table S8. (continued)**

|              |                                                                       |                                                                                               |        |        |         |   |        |                         |
|--------------|-----------------------------------------------------------------------|-----------------------------------------------------------------------------------------------|--------|--------|---------|---|--------|-------------------------|
| <i>matR</i>  | P0 = 0.53767, $\omega$ 0 = 0.25209, P1 = 0.46233, (P2a+P2b = 0)       | P0 = 0.52719, $\omega$ 0 = 0.25399, P1 = 0.46538, $\omega$ 2 = 999.00000, (P2a+P2b = 0.00742) | 616124 | 231991 | 768266  | 1 | 0      | 138 G 0.549;162 L 0.937 |
| <i>mttB</i>  | P0 = 0.62644, $\omega$ 0 = 0.22775, P1 = 0.37355, (P2a+P2b = 0)       | P0 = 0.00000, $\omega$ 0 = 0.22888, P1 = 0.00000, $\omega$ 2 = 69.56743, (P2a+P2b = 1)        | 997233 | 738385 | 517696  | 1 | 0      | 76 I 0.735              |
| <i>nad1</i>  | P0 = 0.85867, $\omega$ 0 = 0.08020, P1 = 0.14133, (P2a+P2b = 0)       | P0 = 0.85867, $\omega$ 0 = 0.08020, P1 = 0.14133, $\omega$ 2 = 1.00000, (P2a+P2b = 0)         | 556740 | 556739 | 2       | 1 | 0.1573 | none                    |
| <i>nad2</i>  | P0 = 0.85736, $\omega$ 0 = 0.13673, P1 = 0.14264, (P2a+P2b = 0)       | P0 = 0.85736, $\omega$ 0 = 0.13673, P1 = 0.14264, $\omega$ 2 = 1.00000, (P2a+P2b = 0)         | 254076 | 254076 | 0       | 1 | 1      | none                    |
| <i>nad3</i>  | P0 = 0.80260, $\omega$ 0 = 0.09334, P1 = 0.19740, (P2a+P2b = 0)       | P0 = 0.80260, $\omega$ 0 = 0.09334, P1 = 0.19740, $\omega$ 2 = 1.00000, (P2a+P2b = 0)         | 754754 | 754718 | 72      | 1 | 0      | none                    |
| <i>nad4</i>  | P0 = 0.63805, $\omega$ 0 = 0.10560, P1 = 0.12036, (P2a+P2b = 0.24159) | P0 = 0.79957, $\omega$ 0 = 0.10557, P1 = 0.15085, $\omega$ 2 = 8.14262, (P2a+P2b = 0.04958)   | 682983 | 444067 | 477832  | 1 | 0      | 101 F 0.666;282 Y 0.565 |
| <i>nad4L</i> | P0 = 0.88082, $\omega$ 0 = 0.05944, P1 = 0.11918, (P2a+P2b = 0)       | P0 = 0.88082, $\omega$ 0 = 0.05944, P1 = 0.11918, $\omega$ 2 = 1.00000, (P2a+P2b = 0)         | 211305 | 211305 | 0       | 1 | 1      | none                    |
| <i>nad5</i>  | P0 = 0.82512, $\omega$ 0 = 0.07890, P1 = 0.07877, (P2a+P2b = 0.09612) | P0 = 0.80601, $\omega$ 0 = 0.07890, P1 = 0.07694, $\omega$ 2 = 3.43304, (P2a+P2b = 0.11705)   | 614042 | 613569 | 946     | 1 | 0      | none                    |
| <i>nad6</i>  | P0 = 0.84264, $\omega$ 0 = 0.11946, P1 = 0.15736, (P2a+P2b = 0)       | P0 = 0.84264, $\omega$ 0 = 0.11946, P1 = 0.15736, $\omega$ 2 = 1.00000, (P2a+P2b = 0)         | 774622 | 774622 | 0       | 1 | 1      | none                    |
| <i>nad7</i>  | P0 = 0.75540, $\omega$ 0 = 0.04222, P1 = 0.11002, (P2a+P2b = 0.13459) | P0 = 0.86195, $\omega$ 0 = 0.04221, P1 = 0.12556, $\omega$ 2 = 14.34779, (P2a+P2b = 0.01249)  | 207648 | 137869 | 139558  | 1 | 0      | 80 L 0.576;107 F 0.741  |
| <i>nad9</i>  | P0 = 0.62737, $\omega$ 0 = 0.09905, P1 = 0.23389, (P2a+P2b = 0.13874) | P0 = 0.68082, $\omega$ 0 = 0.09903, P1 = 0.25383, $\omega$ 2 = 2.71673, (P2a+P2b = 0.06535)   | 33049  | 998902 | 1931706 | 1 | 0      | 132 Y 0.638             |
| <i>rpl10</i> | P0 = 0.57106, $\omega$ 0 = 0.17835, P1 = 0.42894, (P2a+P2b = 0)       | P0 = 0.57105, $\omega$ 0 = 0.17835, P1 = 0.42895, $\omega$ 2 = 1.00000, (P2a+P2b = 0)         | 7138   | 7138   | 0       | 1 | 1      | none                    |
| <i>rpl16</i> | P0 = 0.55834, $\omega$ 0 = 0.09571, P1 = 0.23094, (P2a+P2b = 0.21072) | P0 = 0.56564, $\omega$ 0 = 0.09571, P1 = 0.23396, $\omega$ 2 = 2.65551, (P2a+P2b = 0.20041)   | 843775 | 843776 | 2       | 1 | 0.1573 | none                    |
| <i>rpl2</i>  | P0 = 0.00000, $\omega$ 0 = 0.15937, P1 = 0.00000, (P2a+P2b = 1)       | P0 = 0.00000, $\omega$ 0 = 0.15937, P1 = 0.00000, $\omega$ 2 = 1.00000, (P2a+P2b = 1)         | 829899 | 829899 | 0       | 1 | 1      | 4 L 0.823               |

**Table S8. (continued)**

|              |                                                                       |                                                                                               |        |        |         |   |           |                                 |
|--------------|-----------------------------------------------------------------------|-----------------------------------------------------------------------------------------------|--------|--------|---------|---|-----------|---------------------------------|
| <i>rpl5</i>  | P0 = 0.56464, $\omega$ 0 = 0.17610, P1 = 0.37452, (P2a+P2b = 0.06084) | P0 = 0.47265, $\omega$ 0 = 0.17610, P1 = 0.31351, $\omega$ 2 = 2.96351, (P2a+P2b = 0.21384)   | 54906  | 54918  | 24      | 1 | 9.634E-07 | none                            |
| <i>rps1</i>  | P0 = 0.55354, $\omega$ 0 = 0.18225, P1 = 0.27408, (P2a+P2b = 0.17239) | P0 = 0.53602, $\omega$ 0 = 0.18225, P1 = 0.26540, $\omega$ 2 = 3.01608, (P2a+P2b = 0.19858)   | 348314 | 348313 | 2       | 1 | 0.1573    | none                            |
| <i>rps10</i> | P0 = 0.35619, $\omega$ 0 = 0.05030, P1 = 0.44551, (P2a+P2b = 0.1983)  | P0 = 0.34477, $\omega$ 0 = 0.05030, P1 = 0.43122, $\omega$ 2 = 3.26842, (P2a+P2b = 0.22401)   | 307202 | 307201 | 2       | 1 | 0.1573    | none                            |
| <i>rps11</i> | P0 = 0.44281, $\omega$ 0 = 0.10511, P1 = 0.12116, (P2a+P2b = 0.43603) | P0 = 0.75952, $\omega$ 0 = 0.10520, P1 = 0.20895, $\omega$ 2 = 92.52504, (P2a+P2b = 0.03153)  | 736647 | 212111 | 1049072 | 1 | 0         | 1 K 0.765;74 G 0.831;76 G 0.837 |
| <i>rps12</i> | P0 = 0.58893, $\omega$ 0 = 0.05371, P1 = 0.21901, (P2a+P2b = 0.19205) | P0 = 0.58100, $\omega$ 0 = 0.05371, P1 = 0.21607, $\omega$ 2 = 2.64459, (P2a+P2b = 0.20293)   | 246084 | 246090 | 12      | 1 | 0.000532  | none                            |
| <i>rps13</i> | P0 = 0.87942, $\omega$ 0 = 0.17068, P1 = 0.12058, (P2a+P2b = 0)       | P0 = 0.87942, $\omega$ 0 = 0.17068, P1 = 0.12058, $\omega$ 2 = 1.00000, (P2a+P2b = 0)         | 596898 | 596896 | 4       | 1 | 0.0455    | none                            |
| <i>rps14</i> | P0 = 0.60801, $\omega$ 0 = 0.17363, P1 = 0.23402, (P2a+P2b = 0.15797) | P0 = 0.58688, $\omega$ 0 = 0.17363, P1 = 0.22588, $\omega$ 2 = 3.08103, (P2a+P2b = 0.18724)   | 664893 | 664896 | 6       | 1 | 0.01431   | none                            |
| <i>rps19</i> | P0 = 0.76556, $\omega$ 0 = 0.08044, P1 = 0.23444, (P2a+P2b = 0)       | P0 = 0.76556, $\omega$ 0 = 0.08044, P1 = 0.23444, $\omega$ 2 = 1.00000, (P2a+P2b = 0)         | 593877 | 593877 | 0       | 1 | 1         | none                            |
| <i>rps2</i>  | P0 = 0.76802, $\omega$ 0 = 0.20018, P1 = 0.23198, (P2a+P2b = 0)       | P0 = 0.76802, $\omega$ 0 = 0.20018, P1 = 0.23198, $\omega$ 2 = 1.00000, (P2a+P2b = 0)         | 309356 | 309356 | 0       | 1 | 1         | none                            |
| <i>rps3</i>  | P0 = 0.69822, $\omega$ 0 = 0.13708, P1 = 0.30178, (P2a+P2b = 0)       | P0 = 0.69823, $\omega$ 0 = 0.13708, P1 = 0.30177, $\omega$ 2 = 1.00000, (P2a+P2b = 0)         | 540546 | 540544 | 4       | 1 | 0.0455    | none                            |
| <i>rps4</i>  | P0 = 0.00000, $\omega$ 0 = 0.00000, P1 = 1.00000, (P2a+P2b = 0)       | P0 = 0.00000, $\omega$ 0 = 0.00000, P1 = 1.00000, $\omega$ 2 = 2.65795, (P2a+P2b = 0)         | 724034 | 724034 | 0       | 1 | 1         | none                            |
| <i>rps7</i>  | P0 = 0.83338, $\omega$ 0 = 0.19230, P1 = 0.16662, (P2a+P2b = 0)       | P0 = 0.83338, $\omega$ 0 = 0.19230, P1 = 0.16662, $\omega$ 2 = 1.00000, (P2a+P2b = 0)         | 476124 | 476124 | 0       | 1 | 1         | none                            |
| <i>sdh3</i>  | P0 = 0.59158, $\omega$ 0 = 0.12753, P1 = 0.36021, (P2a+P2b = 0.0482)  | P0 = 0.60975, $\omega$ 0 = 0.12715, P1 = 0.37332, $\omega$ 2 = 999.00000, (P2a+P2b = 0.01693) | 613911 | 951482 | 675142  | 1 | 0         | 35 M 0.670;83 N 0.544           |
| <i>sdh4</i>  | P0 = 0.00000, $\omega$ 0 = 0.21987, P1 = 0.00000, (P2a+P2b = 1)       | P0 = 0.00000, $\omega$ 0 = 0.21998, P1 = 0.00000, $\omega$ 2 = 999.00000, (P2a+P2b = 1)       | 427328 | 517181 | 179706  | 1 | 0         | 25 I 0.961*;31 L 0.956*         |

**Table S9.** The homologs in 78 species of chloroplast-derived fragments in *Nelumbo nucifera* mtDNA.

| Position                               | 469237-471234 | 523411-524797 | 516533-517761                  | 451200-452196 | 471275-471895 | 230963-231283 | 452532-452828 | 181488-181698 | 29058-29263 | 318795-319000 | 523258-523402 | 472035-472175 | 285719-285805 | 426801-426884 | 505480-505560 | 123420-123497 | 413440-413496 | 91514-91569 | 342137-342190 |
|----------------------------------------|---------------|---------------|--------------------------------|---------------|---------------|---------------|---------------|---------------|-------------|---------------|---------------|---------------|---------------|---------------|---------------|---------------|---------------|-------------|---------------|
| Genes Contained                        | petN psbM     | ycf3          | petL, petG traW(CCA) traP(TGG) | psbC          | trnD(GTC)     | psbC          | psbD psbC     | ndhD          | ycf2        | ycf2          | ycf3          | trnT(GGT)     | ycf2          | trnN(GTT)     | trnH(GTG)     | trnM(CAT)     | ndhE          | trnI(GGT)   | trnA(TGC)     |
| SP_name                                | Length(bp)    |               |                                |               |               |               |               |               |             |               |               |               |               |               |               |               |               |             |               |
|                                        | 1998          | 1387          | 1229                           | 997           | 621           | 321           | 297           | 211           | 206         | 206           | 145           | 141           | 87            | 84            | 81            | 78            | 57            | 56          | 54            |
| <i>Brassica rapa subsp. campestris</i> | 0             | 0             | 0                              | 0             | 0             | 0             | 0             | 0             | 0           | 0             | 0             | 0             | 0             | 1             | 1             | 1             | 0             | 0           | 0             |
| <i>Brassica juncea</i>                 | 0             | 0             | 0                              | 0             | 0             | 0             | 0             | 0             | 0           | 0             | 0             | 0             | 0             | 1             | 1             | 1             | 0             | 0           | 0             |
| <i>Brassica oleracea</i>               | 0             | 0             | 0                              | 0             | 0             | 0             | 0             | 0             | 0           | 0             | 0             | 0             | 0             | 1             | 1             | 1             | 0             | 0           | 0             |
| <i>Brassica napus</i>                  | 0             | 0             | 0                              | 0             | 0             | 0             | 0             | 0             | 0           | 0             | 0             | 0             | 0             | 1             | 1             | 1             | 0             | 0           | 0             |
| <i>Brassica carinata</i>               | 0             | 0             | 0                              | 0             | 0             | 0             | 0             | 0             | 0           | 0             | 0             | 0             | 0             | 1             | 1             | 1             | 0             | 0           | 0             |
| <i>Raphanus sativus</i>                | 0             | 0             | 0                              | 0             | 0             | 0             | 0             | 0             | 0           | 0             | 0             | 0             | 0             | 1             | 1             | 1             | 0             | 0           | 0             |
| <i>Arabidopsis thaliana</i>            | 0             | 0             | 0                              | 0             | 0             | 0             | 0             | 0             | 0           | 0             | 0             | 0             | 0             | 1             | 1             | 1             | 0             | 0           | 0             |
| <i>Batis maritima</i>                  | 0             | 0             | 0                              | 0             | 0             | 0             | 0             | 0             | 0           | 0             | 0             | 0             | 0             | 1             | 1             | 1             | 0             | 0           | 0             |
| <i>Carica papaya</i>                   | 0             | 0             | 0                              | 0             | 1             | 0             | 0             | 1             | 1           | 1             | 0             | 0             | 0             | 1             | 1             | 1             | 0             | 0           | 0             |
| <i>Ricinus communis</i>                | 0             | 1             | 0                              | 0             | 0             | 0             | 0             | 0             | 0           | 0             | 1             | 0             | 0             | 1             | 1             | 1             | 0             | 0           | 0             |
| <i>Vigna radiata</i>                   | 0             | 0             | 0                              | 0             | 0             | 0             | 0             | 0             | 0           | 0             | 0             | 0             | 0             | 1             | 1             | 1             | 0             | 0           | 0             |
| <i>Vigna angularis</i>                 | 0             | 0             | 0                              | 0             | 0             | 0             | 0             | 0             | 0           | 0             | 0             | 0             | 0             | 1             | 1             | 1             | 0             | 0           | 0             |
| <i>Glycine max</i>                     | 0             | 0             | 0                              | 0             | 0             | 0             | 0             | 0             | 0           | 0             | 0             | 0             | 0             | 1             | 1             | 1             | 0             | 0           | 0             |
| <i>Milletia pinnata</i>                | 0             | 0             | 0                              | 0             | 0             | 0             | 0             | 0             | 0           | 0             | 0             | 0             | 0             | 1             | 1             | 1             | 0             | 0           | 0             |
| <i>Lotus japonicus</i>                 | 0             | 0             | 0                              | 0             | 0             | 0             | 0             | 0             | 0           | 0             | 0             | 0             | 0             | 1             | 1             | 1             | 0             | 0           | 0             |
| <i>Cucurbita pepo</i>                  | 0             | 0             | 0                              | 0             | 0             | 0             | 0             | 1             | 1           | 1             | 1             | 0             | 0             | 1             | 1             | 1             | 0             | 0           | 0             |
| <i>Cucumis sativus</i>                 | 0             | 0             | 0                              | 0             | 0             | 0             | 0             | 0             | 1           | 1             | 0             | 0             | 0             | 0             | 0             | 1             | 0             | 0           | 0             |
| <i>Citrullus lanatus</i>               | 0             | 0             | 0                              | 0             | 0             | 0             | 0             | 0             | 0           | 0             | 0             | 0             | 0             | 1             | 1             | 1             | 0             | 0           | 0             |
| <i>Malus x domestica</i>               | 0             | 0             | 0                              | 0             | 0             | 0             | 0             | 0             | 0           | 0             | 0             | 0             | 0             | 0             | 1             | 1             | 0             | 0           | 0             |
| <i>Salvia miltiorrhiza</i>             | 0             | 0             | 0                              | 0             | 0             | 0             | 1             | 0             | 1           | 1             | 0             | 0             | 0             | 0             | 1             | 1             | 1             | 0           | 0             |
| <i>Ajuga reptans</i>                   | 0             | 0             | 0                              | 0             | 0             | 0             | 0             | 0             | 0           | 0             | 0             | 0             | 0             | 0             | 1             | 0             | 1             | 0           | 0             |
| <i>Mimulus guttatus</i>                | 0             | 0             | 0                              | 0             | 0             | 0             | 0             | 0             | 0           | 0             | 0             | 0             | 0             | 1             | 1             | 1             | 0             | 0           | 0             |
| <i>Boea hygrometrica</i>               | 0             | 0             | 0                              | 1             | 0             | 1             | 1             | 0             | 1           | 1             | 0             | 0             | 0             | 0             | 1             | 1             | 1             | 0           | 0             |
| <i>Daucus carota subsp. sativus</i>    | 0             | 0             | 0                              | 0             | 0             | 0             | 0             | 0             | 0           | 0             | 0             | 0             | 0             | 1             | 1             | 1             | 0             | 0           | 0             |
| <i>Helianthus annuus</i>               | 0             | 0             | 0                              | 0             | 0             | 0             | 0             | 0             | 0           | 0             | 0             | 0             | 0             | 1             | 1             | 1             | 0             | 0           | 0             |
| <i>Asclepias syriaca</i>               | 0             | 0             | 0                              | 0             | 0             | 0             | 0             | 0             | 0           | 0             | 0             | 0             | 0             | 0             | 1             | 1             | 1             | 0           | 0             |
| <i>Rhazya stricta</i>                  | 0             | 1             | 0                              | 0             | 0             | 0             | 0             | 0             | 0           | 0             | 1             | 0             | 0             | 0             | 1             | 0             | 0             | 0           | 0             |
| <i>Nicotiana tabacum</i>               | 0             | 0             | 1                              | 0             | 0             | 0             | 0             | 0             | 0           | 0             | 0             | 0             | 0             | 1             | 1             | 1             | 0             | 0           | 0             |
| <i>Vaccinium macrocarpon</i>           | 0             | 0             | 0                              | 0             | 0             | 0             | 0             | 1             | 0           | 0             | 0             | 0             | 0             | 1             | 1             | 0             | 1             | 0           | 0             |
| <i>Beta vulgaris subsp. vulgaris</i>   | 0             | 0             | 0                              | 0             | 0             | 0             | 0             | 0             | 0           | 0             | 0             | 0             | 0             | 0             | 1             | 1             | 1             | 0           | 0             |
| <i>Beta vulgaris subsp. maritima</i>   | 0             | 0             | 0                              | 0             | 0             | 0             | 0             | 0             | 0           | 0             | 0             | 0             | 0             | 0             | 1             | 1             | 1             | 0           | 0             |
| <i>Beta macrocarpa</i>                 | 0             | 0             | 0                              | 0             | 0             | 0             | 0             | 0             | 0           | 0             | 0             | 0             | 0             | 0             | 1             | 1             | 1             | 0           | 0             |
| <i>Silene vulgaris</i>                 | 0             | 0             | 0                              | 1             | 0             | 0             | 1             | 0             | 0           | 0             | 0             | 0             | 0             | 0             | 1             | 0             | 0             | 0           | 0             |
| <i>Silene latifolia</i>                | 0             | 0             | 0                              | 0             | 0             | 0             | 0             | 0             | 0           | 0             | 0             | 0             | 0             | 0             | 1             | 1             | 0             | 0           | 0             |
| <i>Vitis vinifera</i>                  | 0             | 0             | 1                              | 1             | 0             | 1             | 1             | 0             | 0           | 0             | 1             | 0             | 0             | 1             | 1             | 1             | 0             | 0           | 0             |
| <i>Zea luxurians</i>                   | 0             | 0             | 0                              | 0             | 0             | 0             | 0             | 0             | 0           | 0             | 0             | 0             | 0             | 0             | 1             | 1             | 1             | 0           | 0             |
| <i>Zea perennis</i>                    | 0             | 0             | 0                              | 0             | 0             | 0             | 0             | 0             | 0           | 0             | 0             | 0             | 0             | 0             | 1             | 1             | 1             | 0           | 0             |
| <i>Zea mays subsp. mays</i>            | 0             | 0             | 0                              | 0             | 0             | 0             | 0             | 0             | 0           | 0             | 0             | 0             | 0             | 0             | 1             | 1             | 1             | 0           | 0             |
| <i>Zea mays subsp. parviglumis</i>     | 0             | 0             | 0                              | 0             | 0             | 0             | 0             | 0             | 0           | 0             | 0             | 0             | 0             | 0             | 1             | 1             | 1             | 0           | 0             |
| <i>Tripsacum dactyloides</i>           | 0             | 0             | 0                              | 0             | 0             | 0             | 0             | 0             | 0           | 0             | 0             | 0             | 0             | 0             | 1             | 1             | 1             | 0           | 0             |
| <i>Sorghum bicolor</i>                 | 0             | 0             | 0                              | 0             | 0             | 0             | 0             | 0             | 0           | 0             | 0             | 0             | 0             | 0             | 1             | 1             | 1             | 0           | 0             |
| <i>Oryza sativa Japonica Group</i>     | 0             | 0             | 0                              | 0             | 0             | 0             | 0             | 0             | 0           | 0             | 0             | 0             | 0             | 0             | 1             | 1             | 1             | 0           | 0             |
| <i>Oryza rufipogon</i>                 | 0             | 0             | 0                              | 0             | 0             | 0             | 0             | 0             | 0           | 0             | 0             | 0             | 0             | 0             | 1             | 1             | 1             | 0           | 0             |
| <i>Oryza sativa Indica Group</i>       | 0             | 0             | 0                              | 0             | 0             | 0             | 0             | 0             | 0           | 0             | 0             | 0             | 0             | 0             | 1             | 1             | 1             | 0           | 0             |
| <i>Triticum timopheevii</i>            | 0             | 0             | 0                              | 0             | 0             | 0             | 0             | 0             | 0           | 0             | 0             | 0             | 0             | 0             | 1             | 0             | 1             | 0           | 0             |
| <i>Triticum aestivum</i>               | 0             | 0             | 0                              | 0             | 0             | 0             | 0             | 0             | 0           | 0             | 0             | 0             | 0             | 0             | 1             | 0             | 1             | 0           | 0             |
| <i>Aegilops speltoides</i>             | 0             | 0             | 0                              | 0             | 0             | 0             | 0             | 0             | 0           | 0             | 0             | 0             | 0             | 0             | 1             | 0             | 1             | 0           | 0             |
| <i>Phoenix dactylifera</i>             | 0             | 0             | 0                              | 0             | 0             | 0             | 0             | 0             | 0           | 0             | 0             | 0             | 0             | 0             | 1             | 1             | 1             | 0           | 0             |
| <i>Butomus umbellatus</i>              | 0             | 0             | 0                              | 0             | 0             | 0             | 0             | 0             | 0           | 0             | 0             | 0             | 0             | 0             | 0             | 1             | 0             | 0           | 0             |
| <i>Spirodela polyrhiza</i>             | 0             | 0             | 0                              | 1             | 0             | 0             | 0             | 0             | 0           | 0             | 0             | 0             | 0             | 0             | 1             | 1             | 1             | 0           | 0             |
| <i>Liriodendron tulipifera</i>         | 1             | 0             | 1                              | 1             | 1             | 1             | 1             | 1             | 0           | 0             | 0             | 0             | 0             | 1             | 1             | 1             | 1             | 0           | 0             |
| <i>Amborella trichopoda</i>            | 0             | 0             | 0                              | 1             | 0             | 1             | 1             | 1             | 0           | 1             | 1             | 0             | 0             | 1             | 1             | 1             | 1             | 0           | 0             |
| <i>Cycas taitungensis</i>              | 0             | 0             | 0                              | 0             | 0             | 0             | 0             | 0             | 0           | 0             | 0             | 0             | 0             | 0             | 0             | 1             | 1             | 0           | 0             |
| <i>Huperzia squarrosa</i>              | 0             | 0             | 0                              | 0             | 0             | 0             | 0             | 0             | 0           | 0             | 0             | 0             | 0             | 0             | 0             | 0             | 0             | 0           | 0             |
| <i>Pleurozia purpurea</i>              | 0             | 0             | 0                              | 0             | 0             | 0             | 0             | 0             | 0           | 0             | 0             | 0             | 0             | 0             | 0             | 0             | 0             | 0           | 0             |
| <i>Anomodon rugelii</i>                | 0             | 0             | 0                              | 0             | 0             | 0             | 0             | 0             | 0           | 0             | 0             | 0             | 0             | 0             | 0             | 0             | 0             | 0           | 0             |
| <i>Hypnum imponens</i>                 | 0             | 0             | 0                              | 0             | 0             | 0             | 0             | 0             | 0           | 0             | 0             | 0             | 0             | 0             | 0             | 0             | 0             | 0           | 0             |
| <i>Climacium americanum</i>            | 0             | 0             | 0                              | 0             | 0             | 0             | 0             | 0             | 0           | 0             | 0             | 0             | 0             | 0             | 0             | 0             | 0             | 0           | 0             |
| <i>Psychomnion cygnisetum</i>          | 0             | 0             | 0                              | 0             | 0             | 0             | 0             | 0             | 0           | 0             | 0             | 0             | 0             | 0             | 0             | 0             | 0             | 0           | 0             |
| <i>Ulota hutchinsiae</i>               | 0             | 0             | 0                              | 0             | 0             | 0             | 0             | 0             | 0           | 0             | 0             | 0             | 0             | 0             | 0             | 0             | 0             | 0           | 0             |
| <i>Orhlotrichum stellatum</i>          | 0             | 0             | 0                              | 0             | 0             | 0             | 0             | 0             | 0           | 0             | 0             | 0             | 0             | 0             | 0             | 0             | 0             | 0           | 0             |
| <i>Bartramia pomiformis</i>            | 0             | 0             | 0                              | 0             | 0             | 0             | 0             | 0             | 0           | 0             | 0             | 0             | 0             | 0             | 0             | 0             | 0             | 0           | 0             |
| <i>Physcomitrella patens</i>           | 0             | 0             | 0                              | 0             | 0             | 0             | 0             | 0             | 0           | 0             | 0             | 0             | 0             | 0             | 0             | 0             | 0             | 0           | 0             |
| <i>Funaria hygrometrica</i>            | 0             | 0             | 0                              | 0             | 0             | 0             | 0             | 0             | 0           | 0             | 0             | 0             | 0             | 0             | 0             | 0             | 0             | 0           | 0             |
| <i>Buxbaumia aphylla</i>               | 0             | 0             | 0                              | 0             | 0             | 0             | 0             | 0             | 0           | 0             | 0             | 0             | 0             | 0             | 0             | 0             | 0             | 0           | 0             |
| <i>Atrichum angustatum</i>             | 0             | 0             | 0                              | 0             | 0             | 0             | 0             | 0             | 0           | 0             | 0             | 0             | 0             | 0             | 0             | 0             | 0             | 0           | 0             |
| <i>Tetraphis pellucida</i>             | 0             | 0             | 0                              | 0             | 0             | 0             | 0             | 0             | 0           | 0             | 0             | 0             | 0             | 0             | 0             | 0             | 0             | 0           | 0             |
| <i>Sphagnum palustre</i>               | 0             | 0             | 0                              | 0             | 0             | 0             | 0             | 0             | 0           | 0             | 0             | 0             | 0             | 0             | 0             | 0             | 0             | 0           | 0             |
| <i>Phaeoceros laevis</i>               | 0             | 0             | 0                              | 0             | 0             | 0             | 0             | 0             | 0           | 0             | 0             | 0             | 0             | 0             | 0             | 0             | 0             | 0           | 0             |
| <i>Marchantia polymorpha</i>           | 0             | 0             | 0                              | 0             | 0             | 0             | 0             | 0             | 0           | 0             | 0             | 0             | 0             | 0             | 0             | 0             | 0             | 0           | 0             |
| <i>Trebouxia lacunosa</i>              | 0             | 0             | 0                              | 0             | 0             | 0             | 0             | 0             | 0           | 0             | 0             | 0             | 0             | 0             | 0             | 0             | 0             | 0           | 0             |
| <i>Nitella hyalina</i>                 | 0             | 0             | 0                              | 0             | 0             | 0             | 0             | 0             | 0           | 0             | 0             | 0             | 0             | 0             | 0             | 0             | 0             | 0           | 0             |
| <i>Chara vulgaris</i>                  | 0             | 0             | 0                              | 0             | 0             | 0             | 0             | 0             | 0           | 0             | 0             | 0             | 0             | 0             | 0             | 0             | 0             | 0           | 0             |
| <i>Roya obtusa</i>                     | 0             | 0             | 0                              | 0             | 0             | 0             | 0             | 0             | 0           | 0             | 0             | 0             | 0             | 0             | 0             | 0             | 0             | 0           | 0             |
| <i>Chaetosphaeridium globosum</i>      | 0             | 0             | 0                              | 0             | 0             | 0             | 0             | 0             | 0           | 0             | 0             | 0             | 0             | 0             | 0             | 0             | 0             | 0           | 0             |
| <i>Entransia fimbriata</i>             | 0             | 0             | 0                              | 0             | 0             | 0             | 0             | 0             | 0           | 0             | 0             | 0             | 0             | 0             | 0             | 0             | 0             | 0           | 0             |
| <i>Chlorokybus atmophyticus</i>        | 0             | 0             | 0                              | 0             | 0             | 0             | 0             | 0             | 0           | 0             | 0             | 0             | 0             | 0             | 0             | 0             | 0             | 0           | 0             |
| <i>Mesostigma viride</i>               | 0             | 0             | 0                              | 0             | 0             | 0             | 0             | 0             | 0           | 0             | 0             | 0             | 0             | 0             | 0             | 0             | 0             | 0           | 0             |

\*Blocks numbered as "1" and marked as green were homologs of chloroplast-derived fragments in *Nelumbo nucifera* mtDNA.

**Table S10.** The primers used to amplify the cDNA of the protein coding genes of the *N. nucifera* mitochondrial genome.

| Gene                                      | Forward Primer        | Reverse Primer        | Predicted Product sizes |
|-------------------------------------------|-----------------------|-----------------------|-------------------------|
| <i>matR</i>                               | GAAGTTTAGACCGCTCACA   | AGCAGACAACCTAACGCAAGC | 2096                    |
| <i>nad5</i>                               | TTTGGTTGTCTGATTACA    | CTCCTCCAGTTCGATTAT    | 2057                    |
| <i>ccmFN</i>                              | CAGAAATTTTAAATGAGCACG | AACCAGCCCAGCAATAAG    | 1777                    |
| <i>rps3</i>                               | AAAAGTAAAGTCTAAGCG    | ACTACATCTGCCTTACG     | 1738                    |
| <i>cox1</i>                               | AGGAAACGAAATAATCTCA   | TTAGGTTCTTAGTAGCAGTC  | 1645                    |
| <i>atp1</i>                               | CCCTTGACTCTATCCTATT   | AGTCCACATTATTCCTTTC   | 1577                    |
| <i>nad4</i>                               | TTCAATGTTGATTCTACT    | TTCTTTGCTGATTCTCT     | 1526                    |
| <i>nad2</i>                               | GCAGAATTAGTTCGGATC    | ACCTTGCAATGATCGAA     | 1512                    |
| <i>ccmFC</i>                              | AATCGAACGGATAGAGCA    | CGCAGCCACTACTTTGAC    | 1398                    |
| <i>cob</i>                                | CAAGAGTTGTCACGATAG    | TGGTGTAACTCACTCG      | 1259                    |
| <i>nad7</i>                               | ATTTCTGCCTTTCTTTCC    | TCGAGCAACTAGTAGTCC    | 1221                    |
| <i>rps4</i>                               | TACGCGATGTGGCGAAAA    | GTCCCTATGAGCGACTAC    | 1114                    |
| <i>rpl2</i>                               | TCGAATGATTACGAGATACA  | CTGTGTGAACAAGGTCTTG   | 1037                    |
| <i>nad1</i>                               | TGAGTGAATAGAAAATCG    | ACTTCCTGGCACATACAT    | 1016                    |
| <i>mttB<math>\psi</math></i> <sup>1</sup> | CAATCCTATTTGTTTTGTTC  | GTGACTTTGCCAGGTTCT    | 896                     |
| <i>cox3</i>                               | ACAACCGAGGCAAAAGTGG   | TCCACTGATTTCGTTCTT    | 836                     |
| <i>cox2</i>                               | AAGAATGAACCAAAACCAA   | TTTTCCCTCACCTACTC     | 831                     |
| <i>atp6</i>                               | GGGATTAATGAAAAGTG     | CGCTTTGTTCATTATA      | 830                     |
| <i>ccmC</i>                               | CCATGCTTTCTTGTTCACTAG | GAGAATCAAGCAACTTGCC   | 811                     |
| <i>rps2</i>                               | TAACCACCTGAGCCAAC     | CCCCTAGCTTGGTATTG     | 734                     |
| <i>nad6</i>                               | TTCAGGGAAGGACGACG     | GAGCGAGTGTCCCCTGGT    | 672                     |
| <i>ccmB</i>                               | GGAACGAAGAAGTAAGGA    | AGGCTTTTCAATGACTTG    | 663                     |
| <i>rps1</i>                               | GAAGAGGAGGAATACAAA    | TGTTTGATCTGCCGCTGT    | 652                     |
| <i>atp4</i>                               | ATGCTGATAACGTTTCTAA   | TAGCATGAACATGAATTAGAT | 638                     |
| <i>nad9</i>                               | GCGGAACTACAAGAAAGC    | CTGGACCTATTCTGATTCTG  | 626                     |
| <i>rpl5</i>                               | GGAAAAGAAAAGCCAAC     | TTCGCTTCTCCGACATCT    | 597                     |
| <i>rpl16</i>                              | TGTATTTAACAGAAAATAG   | TCCCCACTAACCAATTAC    | 558                     |
| <i>rpl10</i>                              | TTCTTTGAAGATCGAGGA    | CTTCCCGACCTATTTTAC    | 553                     |
| <i>atp8</i>                               | TCTGGAGGGAATCATT      | CCGAACGACCAAGTCATA    | 535                     |
| <i>sdh4</i>                               | CATCACGTTGGCTTTGAA    | TCTCAGTCTCAGCCTCCA    | 496                     |
| <i>rps7</i>                               | TTGCTCGGAAATCTTAG     | GCTCTTATGTGGTCTCA     | 489                     |
| <i>rps11</i>                              | GGGCAGGAGTTTCAAATC    | GGAGAACTTCTTGGAAC     | 483                     |
| <i>rps10</i>                              | CCAAAAGAAACACCACC     | TTTGATCCCCTTTTCTC     | 424                     |
| <i>rps12</i>                              | GAAGACAAAGGAAAGAGC    | AACAAGTTCAAGAGGCAT    | 422                     |
| <i>sdh3a</i> <sup>2</sup>                 | TGAGCATCCATCAACAAC    | GAGAAGCACAAGCAGTGA    | 419                     |
| <i>nad3</i>                               | AGAACGAAGTGGGCTGTG    | TTTTGCCCTATCACTAGT    | 398                     |
| <i>rps13</i>                              | TAGTCCAAGGAAGGATCA    | TACCAAGGGCTTTCGGTA    | 398                     |
| <i>sdh3b</i> <sup>2</sup>                 | GAACATCCATCAACAACA    | TACAGTCATTCCATCTT     | 360                     |
| <i>nad4L</i>                              | CTTTACATTCCACGTTT     | CTTCGTATTTGTAACTC     | 358                     |
| <i>rps14</i>                              | GATGAGGGGAAACTCAGT    | CCTTGTCTATTGGTTTGG    | 350                     |
| <i>rps19</i>                              | GGGAAACGCAGAAATTAG    | GCCATATGCGTTAGACT     | 324                     |
| <i>atp9</i>                               | GGAAAAGCGTGACGAGAA    | AGAGGTTAAAATCAAAACT   | 284                     |

<sup>1</sup> *mttB $\psi$*  represents a pseudogene.

<sup>2</sup> *sdh3a* and *sdh3b* are two different copies of gene *sdh3*.



**Table S11.** Accession numbers of the species used in the present study.

| Species                                | Accession No.     | Species                          | Accession   |
|----------------------------------------|-------------------|----------------------------------|-------------|
| <i>Aegilops speltoides</i>             | NC_022666.1       | <i>Marchantia polymorpha</i>     | NC_001660.1 |
| <i>Ajuga reptans</i>                   | NC_023103.1       | <i>Mesostigma viride</i>         | NC_008240.1 |
| <i>Amborella trichopoda</i>            | KF754799-KF754803 | <i>Milletia pinnata</i>          | NC_016742.1 |
| <i>Anomodon rugelii</i>                | NC_016121.1       | <i>Mimulus guttatus</i>          | NC_018041.1 |
| <i>Arabidopsis thaliana</i>            | NC_001284.2       | <i>Nicotiana tabacum</i>         | NC_006581.1 |
| <i>Asclepias syriaca</i>               | NC_022796.1       | <i>Nitella hyalina</i>           | NC_017598.1 |
| <i>Atrichum angustatum</i>             | NC_024520.1       | <i>Orthotrichum stellatum</i>    | NC_024522.1 |
| <i>Bartramia pomiformis</i>            | NC_024519.1       | <i>Oryza rufipogon</i>           | NC_013816.1 |
| <i>Batis maritima</i>                  | NC_024429.1       | <i>Oryza sativa Indica Group</i> | NC_007886.1 |
| <i>Beta macrocarpa</i>                 | NC_015994.1       | <i>Oryza sativa Japonica</i>     | NC_011033.1 |
| <i>Beta vulgaris subsp. maritima</i>   | NC_015099.1       | <i>Phaeoceros laevis</i>         | NC_013765.1 |
| <i>Beta vulgaris subsp. vulgaris</i>   | NC_002511.2       | <i>Phoenix dactylifera</i>       | NC_016740.1 |
| <i>Boea hygrometrica</i>               | NC_016741.1       | <i>Physcomitrella patens</i>     | NC_007945.1 |
| <i>Brassica carinata</i>               | NC_016120.1       | <i>Pleurozia purpurea</i>        | NC_013444.1 |
| <i>Brassica juncea</i>                 | NC_016123.1       | <i>Ptychomnion cygnisetum</i>    | NC_024514.1 |
| <i>Brassica napus</i>                  | NC_008285.1       | <i>Raphanus sativus</i>          | NC_018551.1 |
| <i>Brassica oleracea</i>               | NC_016118.1       | <i>Rhazya stricta</i>            | NC_024293.1 |
| <i>Brassica rapa subsp. campestris</i> | NC_016125.1       | <i>Ricinus communis</i>          | NC_015141.1 |
| <i>Butomus umbellatus</i>              | NC_021399.1       | <i>Roya obtusa</i>               | NC_022863.1 |
| <i>Buxbaumia aphylla</i>               | NC_024518.1       | <i>Salvia miltiorrhiza</i>       | NC_023209.1 |
| <i>Carica papaya</i>                   | NC_012116.1       | <i>Silene latifolia</i>          | NC_014487.1 |
| <i>Chaetosphaeridium globosum</i>      | NC_004118.1       | <i>Silene vulgaris</i>           | NC_016406.1 |
| <i>Chara vulgaris</i>                  | NC_005255.1       | <i>Sorghum bicolor</i>           | NC_008360.1 |
| <i>Chlorokybus atmophyticus</i>        | NC_009630.1       | <i>Sphagnum palustre</i>         | NC_024521.1 |
| <i>Citrullus lanatus</i>               | NC_014043.1       | <i>Spirodela polyrhiza</i>       | NC_017840.1 |
| <i>Climacium americanum</i>            | NC_024515.1       | <i>Tetraphis pellucida</i>       | NC_024290.1 |
| <i>Cucumis sativus</i>                 | NC_016005.1       | <i>Treubia lacunosa</i>          | NC_016122.1 |
| <i>Cucurbita pepo</i>                  | NC_014050.1       | <i>Tripsacum dactyloides</i>     | NC_008362.1 |
| <i>Cycas taitungensis</i>              | NC_010303.1       | <i>Triticum aestivum</i>         | NC_007579.1 |
| <i>Daucus carota subsp. sativus</i>    | NC_017855.1       | <i>Triticum timopheevii</i>      | NC_022714.1 |
| <i>Entransia fimbriata</i>             | NC_022861.1       | <i>Ulotia hutchinsiae</i>        | NC_024517.1 |
| <i>Funaria hygrometrica</i>            | NC_024523.1       | <i>Vaccinium macrocarpon</i>     | NC_023338.1 |
| <i>Glycine max</i>                     | NC_020455.1       | <i>Vigna angularis</i>           | NC_021092.1 |
| <i>Helianthus annuus</i>               | NC_023337.1       | <i>Vigna radiata</i>             | NC_015121.1 |
| <i>Huperzia squarrosa</i>              | NC_017755.1       | <i>Vitis vinifera</i>            | NC_012119.1 |
| <i>Hypnum imponens</i>                 | NC_024516.1       | <i>Zea luxurians</i>             | NC_008333.1 |
| <i>Liriodendron tulipifera</i>         | NC_021152.1       | <i>Zea mays subsp. mays</i>      | NC_007982.1 |
| <i>Lotus japonicus</i>                 | NC_016743.2       | <i>Zea mays subsp.</i>           | NC_008332.1 |
| <i>Malus x domestica</i>               | NC_018554.1       | <i>Zea perennis</i>              | NC_008331.1 |

**Method S1.** The method for isolating the *N. nucifera* mitochondrial genome.

The round ends of the mature *N. nucifera* seed shell were cut open carefully in the premise of embryo intactness. Then, the seeds were rinsed with sterile water twice and germinated in a dark environment in the incubator at room temperature. When the green embryos became completely yellow, 250 g leaves were cut and homogenized in a Waring blender (2×10 second pulses and 2×5 second pulses, respectively) in chilled homogenization buffer (0.4 M Sucrose, 50 mM Tris-HCl, 3 mM EDTA<sub>2</sub>Na, 0.5% BSA, 1% PVP-40. Add 0.5% β-mercaptoethanol immediately before use, pH 7.5) at a 1:4 (w/v) ratio. After filtration through four layers of miracloth, the extract was centrifuged at 1,000 g for 15 min to eliminate large cell fragments. To sediment the mitochondria, the supernatant was recentrifuged at 3,000 g for 15 min to eliminate plastids, and the resulting supernatant was then centrifuged at 18,000 g for 20 min. To purify the mitochondria, the crude mitochondrial pellet was resuspended in wash buffer A (0.4 M Sucrose, 50 mM Tris-HCl, pH7.5), adding MgCl<sub>2</sub> and DNase I to final concentrations of 10 mM and 50 μg/ml, separately. The result was mixed gently but well and incubated for 1 h on ice with occasional swirling. The suspension was centrifuged at 18,000 g for 20 min at 4°C. The pellet was resuspended in wash buffer B (0.4 M Sucrose, 50 mM Tris-HCl, 25 mM EDTA<sub>2</sub>Na, pH 7.5) and layered on a discontinuous sucrose density gradient that consisted of 0.6/1.2/1.6/2.0 M sucrose solutions (pH 7.5) that contained 10 mM EDTA<sub>2</sub>Na. The gradient was placed in a SW-627 rotor and centrifuged at 80,000 g for 45 min. Purified mitochondria were removed from the 1.6 M-1.2 M interphase and washed with wash buffer B (0.4 M Sucrose, 50 mM Tris-HCl, 25 mM EDTA<sub>2</sub>Na, pH 7.5) and centrifuged at 18,000 g for 20 min. The pellet was resuspended in 2 ml wash buffer B (0.4 M Sucrose, 50 mM Tris-HCl, 25 mM EDTA<sub>2</sub>Na, pH7.5). One-fifth volume of lysis buffer (5% SDS, 50 mM Tris-HCl, 25 mM EDTA<sub>2</sub>Na) and Proteinase K (final concentration of 200 μg/ml) were gently added to the mitochondria solutions. Then, the tube was gently inverted and mixed once for every 15 min during a period of 30 min at 37°C, 30 min at 50°C and 30 min at 65°C in water bath. After cold NH<sub>4</sub>Ac to 0.8 M final concentration was added, the nucleic acids were extracted with an equal volume of Tris-saturated phenol/chloroform/isoamyl alcohol (PCI, 25:24:1) once and chloroform/isoamyl alcohol once (CI, 24:1), separately. The mtDNA were precipitated in 2 volumes of 100% ethanol overnight at -20°C and centrifuged at 18,000 g for 20 min. The crude DNA was washed twice with 70% ethanol and resuspended in TE buffer with RNase digestion for 30 min at 37°C.

We designed three pairs of primers that specifically corresponded to the loci of the nuclear *β-actin* gene (*β-actin*\_F: 5'-CCTGATGGGCAAGTGATT-3', *β-actin*\_R: 5'-GCTCAT-ACGGTCAGCAATA-3'), the mitochondrial *rps3* (ribosomal protein S3) gene (*rps3*\_F: 5'-CAAGCATCCGAAATACGC-3', *rps3*\_R: 5'-TACTTCCGCAGGAGCATA-3') and the chloroplast *rbcL* (the ribulose 1, 5-bisphosphate carboxylase) gene (*rbcL*\_F: 5'-GCTGCCGAATCTTCTACTGG-3', *rbcL*\_R: 5'-CCAAGGGTGTCC TAAAGT-3'). The purity of the mtDNA was evaluated by the semi-quantitative PCR technique with these specific primers.
